# Supplementary material for: Formal [5 + 2] cycloaddition of ortho-indolizinyl anilines with cyclopentenediones: access to planar indolizine-fused azepines
Source: Royal Society of Chemistry journal article supplement (doi:10.1039/d3qo00266g), 2023-01-01

## Content

|                                                                                |    |
|--------------------------------------------------------------------------------|----|
| 1. General information .....                                                   | 2  |
| 2. General procedure for the preparation of 2-(2-aminophenyl)indolizines. .... | 2  |
| 3. General procedure for the preparation of cyclopentene-1,3-diones.....       | 3  |
| 4. General procedure for the formal [5+2] cycloaddition .....                  | 3  |
| 5. Large-scale synthesis of the product <b>3aa</b> .....                       | 4  |
| 6. Procedure for the late-stage functionalizations of <b>3aa</b> . ....        | 4  |
| 7. ESI-MS spectrum.....                                                        | 5  |
| 8. Analytical data .....                                                       | 6  |
| 9. X-ray crystallographic analysis.....                                        | 15 |
| 10. Photophysical properties .....                                             | 16 |
| 11. Copies of NMR spectroscopy .....                                           | 19 |

## 1. General information

The products were purified by column chromatography on silica gel (200-300 mesh). For thin-layer chromatography (TLC) analysis, silica gel plates (HSGF254) were used. Visualization of the developed TLC plates was performed with ultraviolet irradiation (254 nm) or staining potassium permanganate solution followed by heating using a heat gun. High resolution mass spectra on a Bruker Apex IV RTMS spectrometer.  $^1\text{H}$  and  $^{13}\text{C}$  NMR spectra were recorded on Bruker AVANCE-400 (400 MHz) spectrometer and Bruker AVANCE-500 (500 MHz) spectrometer. Chemical shifts were reported in parts per million (ppm), and the residual solvent peak was used as an internal reference: proton (chloroform  $\delta$  7.26), carbon (chloroform  $\delta$  77.0) or tetramethylsilane (TMS  $\delta$  0.00) was used as a reference. Multiplicity was indicated as follows: s (singlet), d (doublet), t (triplet), q (quartet), m (multiplet), dd (doublet of doublet), bs (broad singlet). Coupling constants were reported in Hertz (Hz). Melting points were determined on a SGW X-4 melting apparatus. UV-visible absorption and fluorescence emission spectra were recorded on commercial spectrophotometers (Shimadzu UV-2450 and Edinburgh FS5 spectrometers, 190-900 nm scan range). Fluorescence emission spectra were recorded on a Hitachi F-4600 FL Spectrophotometer. Quantum yields were determined on an absolute PL quantum yield Spectrometer (Hamamatsu Quantaaurus-QY C11347).

## 2. General procedure for the preparation of 2-(2-aminophenyl)indolizines.

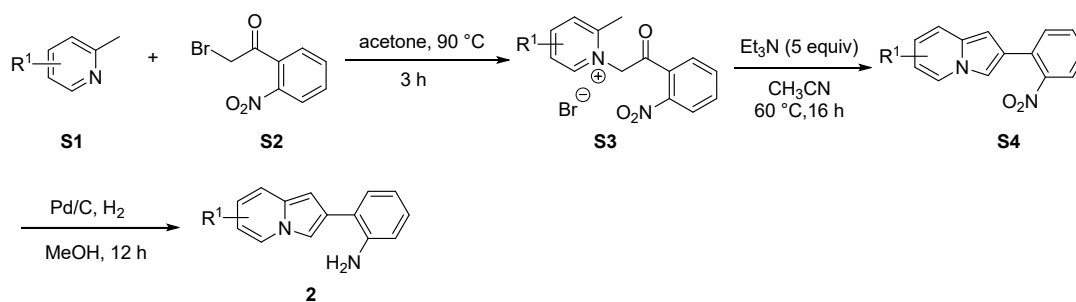

To a mixture of 2-bromo-2'-nitroacetophenone **S2** (2.00 mmol) in acetone (10 mL), 2-methyl pyridine **S1** (2.40 mmol) was added. Then, the reaction mixture stirred at 90 °C for 3 h. After cooled to room temperature, the reaction mixture was suction-filtered and washed with CH<sub>2</sub>Cl<sub>2</sub> (10 mL). The solid was used directly for the next step without further purification. To a mixture of indolizinium salt **S3** (1.50 mmol) and Et<sub>3</sub>N (5.0 equiv) in CH<sub>3</sub>CN (15 mL) was stirred at 60 °C for 16 h. After cooling to room temperature, the solvent was removed under reduced pressure. The residue was purified by flash chromatography on silica gel (petroleum ether/ethyl acetate 10:1) to afford 2-(2-nitrophenyl)indolizines **S4**. To the solution of **S4** in MeOH (10 mL) was added Pd/C (10 mol%) under hydrogen atmosphere. The reaction mixture was stirred at room temperature. The reaction was monitored by TLC until **S4** was consumed completely. After that, filtration to remove solids, then the solvent was removed under reduced pressure, and the crude product was purified by silica gel column chromatography (silica flash, 10~40% ethyl acetate in petroleum ether) to give the corresponding **2**.

### 3. General procedure for the preparation of cyclopentene-1,3-diones.

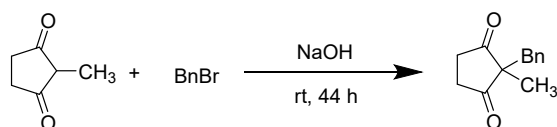

2-Methylcyclopentane-1,3-dione (1.0 equiv) was stirred with 1 M NaOH solution (aq., 1.0 equiv) at room temperature for 10 min. To this suspension was added benzyl bromide (2.0 equiv) at once and the resulting bi-phasic solution was stirred vigorously. After being stirred for 48 hours, the reaction mixture was diluted with EtOAc (10 mL). The aqueous phase was back-extracted with EtOAc twice (10 mL $\times$ 2). The combined organic phase was dried over anhydrous Na<sub>2</sub>SO<sub>4</sub> and concentrated under reduced pressure. The residue was purified by flash chromatography (silica gel, 15% EtOAc in petroleum ether) to obtain a white solid. (Note: Reactions were performed at room temperature for all liquid alkyl bromides and the reactions with solid alkyl bromides were carried out at the temperature slightly above melting point).

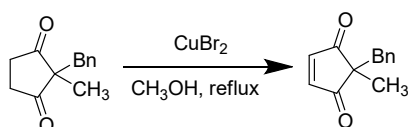

To a solution of 2,2-disubstituted cyclopentane-1,3-dione (8.00 mmol, 1.0 equiv) in MeOH (50 mL, 0.16 M) under argon atmosphere was added copper(II) bromide (3.93 g, 17.60 mmol, 2.2 equiv) and the resulting brown solution was stirred under reflux for 1 hour. The reaction mixture was cooled to room temperature and then added the following solution in sequence: 10 mL of H<sub>2</sub>O, 10 mL of HCl (aq., 1 M), and 20 mL of DCM. The aqueous phase was separated and extracted for 2 times with DCM. The collected organic phase was dried over MgSO<sub>4</sub>, filtered and concentrated under reduced pressure.

### 4. General procedure for the formal [5+2] cycloaddition

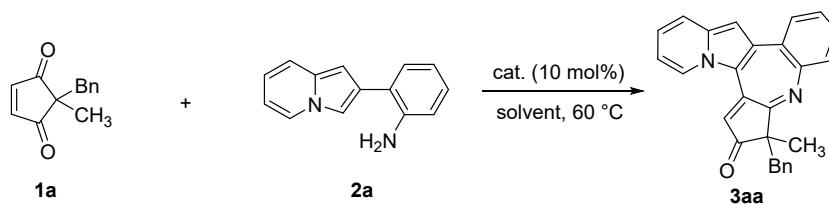

To a 4 mL vial was added cyclopentene-1,3-diones **1a** (0.10 mmol, 1.0 equiv.), indolizine **2a** (0.12 mmol, 1.2 equiv.) and *p*-NO<sub>2</sub>BzOH (0.01 mmol, 10 mol%) in 1.0 mL *o*-xylene. The mixture was stirred at 60 °C and monitored by TLC until completion of the reaction. The solvent was removed by a rotary evaporator and the residue was directly purified by flash chromatography on silica gel (petroleum ether/ethyl acetate 5:1) to afford the product **3aa**.

## 5. Large-scale synthesis of the product **3aa**.

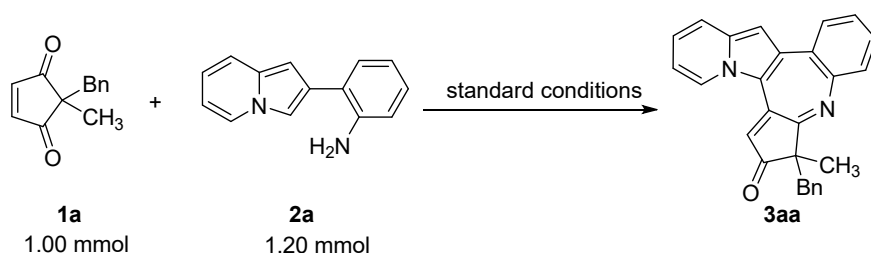

To a flask was added cyclopentene-1,3-diones **1a** (200.2 mg, 1.00 mmol, 1.0 equiv.), indolizine **2a** (249.9 mg, 1.20 mmol, 1.2 equiv.) and *p*-NO<sub>2</sub>BzOH (16.7 mg, 0.10 mmol, 10 mol%) in 10 mL *o*-xylene. The mixture was stirred at 60 °C and monitored by TLC until completion of the reaction. The solvent was removed by a rotary evaporator and the residue was directly purified by flash chromatography on silica gel (petroleum ether/ethyl acetate 5:1) to afford the product **3aa** in 236.0 mg (61% yield).

## 6. Procedure for the late-stage functionalizations of **3aa**.

### a. Procedure for the bromination of **3aa**.

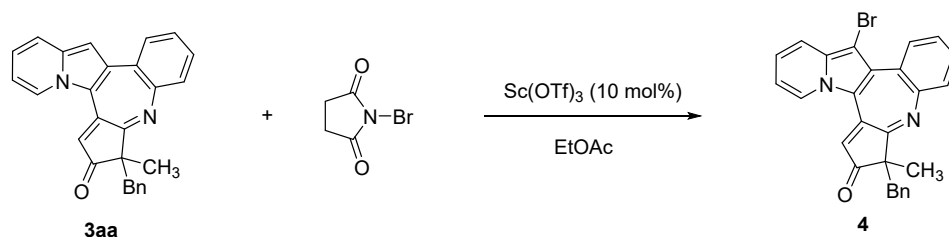

To a 4 mL vial was added **3aa** (19.4 mg, 0.05 mmol, 1.0 equiv.), NBS (10.7 mg, 0.06 mmol, 1.2 equiv.) and Sc(OTf)<sub>3</sub> (2.5 mg, 0.005 mmol, 10 mol%) in 2 mL EtOAc. The mixture was stirred at room temperature (20 °C) and monitored by TLC until completion of the reaction. The solvent was removed by a rotary evaporator and the residue was directly purified by flash chromatography on silica gel (petroleum ether/ethyl acetate 2:1) to afford the product **4** (20.0 mg, 86% yield).

### b. Procedure for the reduction of **3aa**.

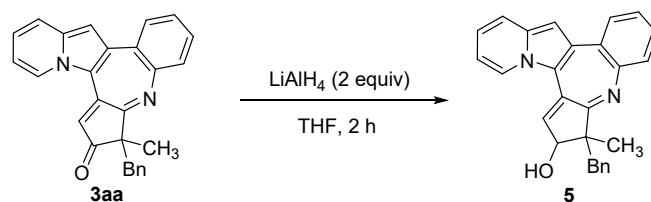

Compound **3aa** (38.8 mg, 0.10 mmol) was dissolved in THF (2.0 mL), LiAlH<sub>4</sub> (1 M in THF, 0.2 mL, 0.20 mmol, 2.0 equiv) was added slowly at 0 °C. The reaction mixture was then allowed to stir at room temperature (20 °C). The reaction system was monitored by TLC until **3aa** was consumed completely. Then, the reaction mixture was quenched by a drop of water and directly purified by column chromatography on silica gel (petroleum ether/ethyl acetate 8:1) to provide compound **5** as a yellow solid (14.3 mg, 37% yield).

### c. Procedure for the sulfuration of **3aa**.

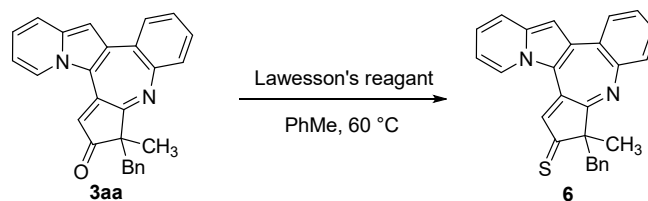

Compound **3aa** (38.8 mg, 0.10 mmol) was dissolved in dry toluene (2.0 mL), and Lawesson's reagent (48.5 mg, 1.2 equiv) was added into the solution. The reaction mixture was then allowed to stir at 60 °C. The reaction system was monitored by TLC until **3aa** was consumed completely. Then, the solvent was removed by a rotary evaporator and the residue was directly purified by column chromatography on silica gel (petroleum ether/ethyl acetate 10:1) to provide compound **6** (12.7 mg, 63% yield).

## 7. ESI-MS spectrum

The model reaction was performed under the optimal condition. Retrieve the sample at different time intervals for the ESI-MS test. Figure S1a shown the result on the reaction after 1 hour, indicating the formation of the intermediate of  $m/z$  409. After the reaction for 12 h, the intermediate of  $m/z$  409 disappeared from Figure S1b and another intermediate of  $m/z$  407 was formed.

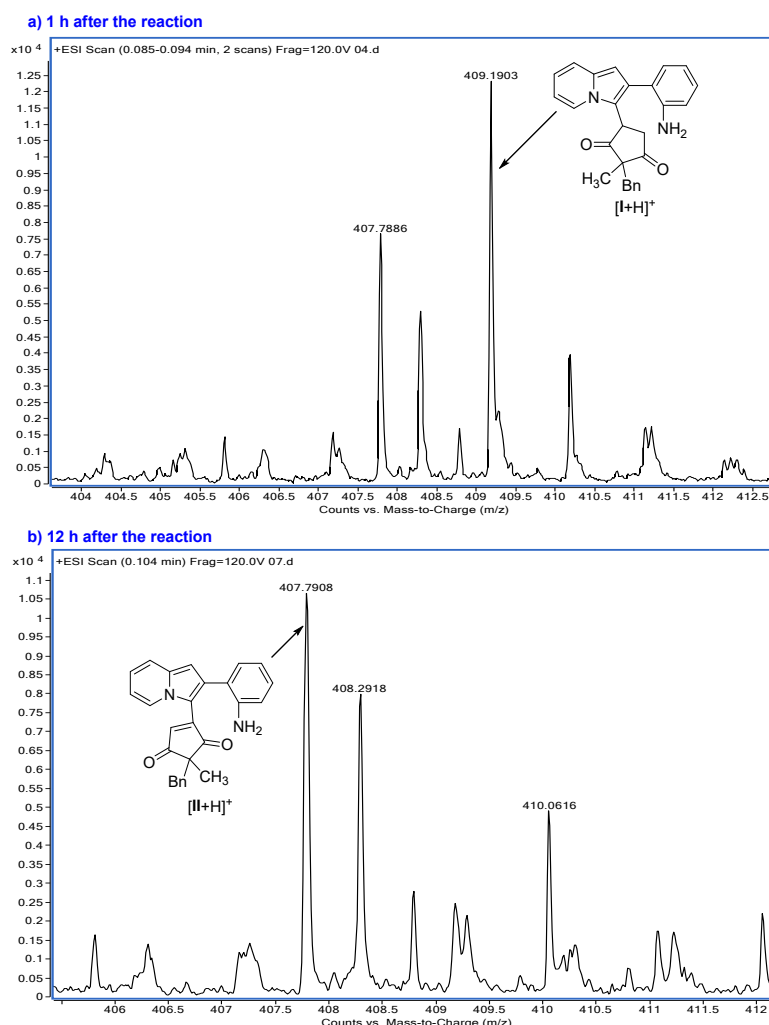

Figure S1. ESI-(+)-MS spectrum after 1 h (a) and 12 h (b).

## 8. Analytical data

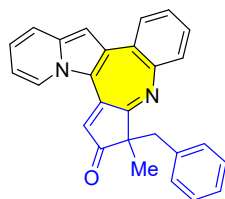

The compound **3aa** was obtained as a yellow solid (30.3 mg, 78% yield).

Melting point 221-223 °C.

$^1\text{H NMR}$  (400 MHz, Chloroform-*d*)  $\delta$  8.10 (dd,  $J = 7.3, 1.0$  Hz, 1H), 8.06 (dd,  $J = 8.0, 1.5$  Hz, 1H), 7.90 (dd,  $J = 7.9, 1.5$  Hz, 1H), 7.54 (td,  $J = 7.6, 1.5$  Hz, 1H), 7.49 (dt,  $J = 8.9, 1.3$  Hz, 1H), 7.44 (ddd,  $J = 8.5, 7.2, 1.6$  Hz, 1H), 7.14 (s, 1H),

7.04 (ddd,  $J = 8.9, 6.6, 0.9$  Hz, 1H), 6.99 (dd,  $J = 7.4, 2.3$  Hz, 2H), 6.92 – 6.85 (m, 3H), 6.70 (td,  $J = 6.9, 1.4$  Hz, 1H), 6.41 (s, 1H), 3.27 – 3.12 (m, 2H), 1.48 (s, 3H).

$^{13}\text{C NMR}$  (101 MHz, Chloroform-*d*)  $\delta$  206.7, 170.5, 147.4, 142.5, 139.5, 137.5, 135.2, 133.3, 129.9, 129.5, 128.6, 128.0, 127.5, 126.3, 126.2, 125.7, 123.3, 120.2, 119.1, 117.4, 113.0, 101.1, 55.0, 43.4, 21.6.

HRMS (ESI-TOF)  $m/z$  :  $[\text{M}+\text{H}]^+$  Calcd for  $\text{C}_{27}\text{H}_{21}\text{N}_2\text{O}^+$  389.1649; Found: 389.1652.

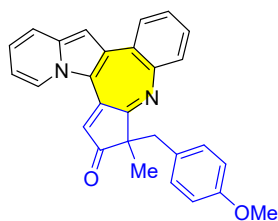

The compound **3ba** was obtained as a yellow solid (28.1 mg, 67% yield).

Melting point 248-255 °C.

$^1\text{H NMR}$  (400 MHz, Chloroform-*d*)  $\delta$  8.07 (dd,  $J = 15.6, 7.6$  Hz, 2H), 7.89 (d,  $J = 9.1$  Hz, 1H), 7.59 – 7.47 (m, 2H), 7.43 (t,  $J = 7.7$  Hz, 1H), 7.14 (s, 1H), 7.08 – 7.01 (m, 1H), 6.89 (d,  $J = 8.5$  Hz, 2H), 6.70 (t,  $J = 6.9$  Hz, 1H), 6.44 – 6.36 (m, 3H), 3.47 (s, 3H), 3.20 – 3.05 (m, 2H), 1.46 (s, 3H).

$^{13}\text{C NMR}$  (101 MHz, Chloroform-*d*)  $\delta$  206.8, 170.8, 157.9, 147.5, 142.6, 139.5, 135.1, 133.2, 130.8, 129.6, 129.4, 128.5, 128.1, 126.3, 125.5, 123.3, 120.5, 119.1, 117.5, 112.9, 112.9, 101.1, 55.4, 54.9, 42.8, 21.3.

HRMS (ESI-TOF)  $m/z$  :  $[\text{M}+\text{H}]^+$  Calcd for  $\text{C}_{28}\text{H}_{23}\text{N}_2\text{O}_2^+$  419.1754; Found: 419.1752.

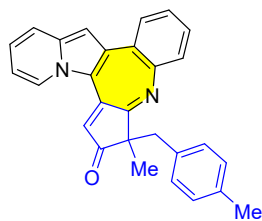

The compound **3ca** was obtained as a yellow solid (32.4 mg, 80% yield).

Melting point 220-235 °C.

$^1\text{H NMR}$  (400 MHz, Chloroform-*d*)  $\delta$  8.09 – 7.97 (m, 2H), 7.89 (dd,  $J = 8.0, 1.5$  Hz, 1H), 7.58 – 7.47 (m, 2H), 7.43 (s, 1H), 7.13 (s, 1H), 7.09 – 7.01 (m, 1H), 6.88 – 6.81 (m, 2H), 6.74 – 6.62 (m, 3H), 6.37 (s, 1H), 3.22 – 3.07 (m, 2H), 1.97 (s, 3H), 1.47 (s, 3H).

$^{13}\text{C NMR}$  (101 MHz, Chloroform-*d*)  $\delta$  206.7, 170.7, 147.6, 142.6, 139.4, 135.7, 135.0, 134.3, 133.2, 129.7, 129.4, 128.5, 128.2, 128.1, 126.7, 125.5, 123.2, 120.6, 119.1, 117.5, 112.8, 101.1, 55.5, 43.3, 21.3, 20.8.

HRMS (ESI-TOF)  $m/z$  :  $[\text{M}+\text{H}]^+$  Calcd for  $\text{C}_{28}\text{H}_{23}\text{N}_2\text{O}^+$  403.1802; Found: 403.1812.

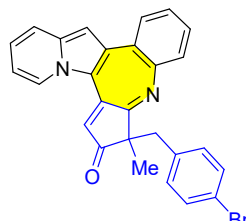

The compound **3da** was obtained as a yellow solid (29.8 mg, 64% yield).

Melting point 311-319 °C.

$^1\text{H NMR}$  (500 MHz, Chloroform-*d*)  $\delta$  8.18 (d,  $J = 7.3$  Hz, 1H), 8.09 (dd,  $J = 7.8, 1.5$  Hz, 1H), 7.89 (dd,  $J = 7.7, 1.6$  Hz, 1H), 7.58 – 7.52 (m, 2H), 7.48 – 7.43 (m, 1H), 7.19 (s, 1H), 7.11 (dd,  $J = 8.8, 6.6$  Hz, 1H), 7.00 (d,  $J = 8.2$  Hz, 2H), 6.87 (d,  $J = 8.3$  Hz, 2H), 6.79 (t,  $J = 6.8$  Hz, 1H), 6.43 (s, 1H), 3.20 –

3.07 (m, 2H), 1.47 (s, 3H).

$^{13}\text{C}$  NMR (125 MHz, Chloroform-*d*)  $\delta$  206.7, 170.5, 155.3, 142.8, 140.1, 136.9, 135.5, 133.8, 132.0, 131.0, 129.9, 129.1, 128.5, 126.8, 125.9, 124.1, 120.7, 120.3, 119.6, 117.8, 113.8, 101.7, 55.2, 42.9, 22.2.

HRMS (ESI-TOF)  $m/z$  :  $[\text{M}+\text{H}]^+$  Calcd for  $\text{C}_{27}\text{H}_{19}\text{BrN}_2\text{O}^+$  467.0754; Found: 467.0763.

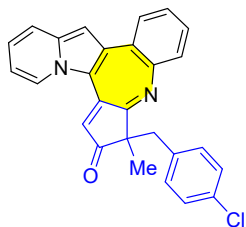

The compound **3ea** was obtained as a yellow solid (27.4 mg, 65% yield).

Melting point 301-303 °C.

$^1\text{H}$  NMR (400 MHz, Chloroform-*d*)  $\delta$  8.20 (d,  $J = 3.6$  Hz, 1H), 8.09 (dd,  $J = 8.0, 1.5$  Hz, 1H), 7.89 (dd,  $J = 7.9, 1.5$  Hz, 1H), 7.58 – 7.52 (m, 2H), 7.46 (ddd,  $J = 8.0, 7.2, 1.6$  Hz, 1H), 7.19 (s, 1H), 7.12 – 7.08 (m, 1H), 6.92 (d,  $J = 8.5$  Hz, 2H), 6.85 (d,  $J = 8.5$  Hz, 2H), 6.83 – 6.76 (m, 1H), 6.44 (s, 1H), 3.22

– 3.09 (m, 2H), 1.47 (s, 3H).

$^{13}\text{C}$  NMR (101 MHz, Chloroform-*d*)  $\delta$  206.7, 170.5, 147.8, 140.1, 136.4, 135.5, 133.8, 132.5, 131.6, 129.9, 129.1, 128.5, 128.0, 126.7, 125.9, 124.0, 120.4, 119.6, 118.1, 113.7, 108.1, 101.7, 53.8, 42.8, 22.2.

HRMS (ESI-TOF)  $m/z$  :  $[\text{M}+\text{H}]^+$  Calcd for  $\text{C}_{27}\text{H}_{20}\text{ClN}_2\text{O}^+$  423.1259; Found: 423.1249.

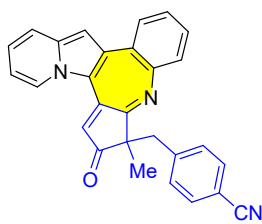

The compound **3fa** was obtained as a yellow solid (36.0 mg, 87% yield).

Melting point 275-280 °C.

$^1\text{H}$  NMR (400 MHz, Chloroform-*d*)  $\delta$  8.23 (d,  $J = 7.2$  Hz, 1H), 8.10 (d,  $J = 9.5$  Hz, 1H), 7.89 (d,  $J = 7.8$  Hz, 1H), 7.61 – 7.52 (m, 2H), 7.47 (t,  $J = 6.8$  Hz, 1H), 7.20 (d,  $J = 8.3$  Hz, 3H), 7.12 (d,  $J = 8.2$  Hz, 3H), 6.82 (t,  $J = 7.6$  Hz, 1H), 6.45 (s, 1H), 3.34 – 3.14 (m, 2H), 1.49 (s, 3H).

$^{13}\text{C}$  NMR (101 MHz, Chloroform-*d*)  $\delta$  205.8, 169.4, 147.2, 143.3, 142.2, 139.9, 135.2, 133.7, 131.3, 130.8, 129.7, 129.0, 128.2, 126.3, 125.6, 124.0, 119.4, 119.4, 118.9, 117.3, 113.6, 110.1, 101.6, 54.6, 42.7, 22.3.

HRMS (ESI-TOF)  $m/z$  :  $[\text{M}+\text{H}]^+$  Calcd for  $\text{C}_{28}\text{H}_{20}\text{N}_3\text{O}^+$  414.1601; Found: 414.1600.

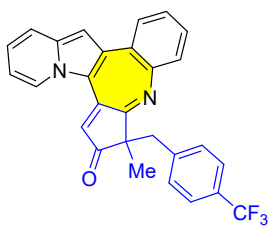

The compound **3ga** was obtained as a yellow solid (28.2 mg, 62% yield).

Melting point 246-250 °C.

$^1\text{H}$  NMR (400 MHz, Chloroform-*d*)  $\delta$  8.14 (d,  $J = 7.3$  Hz, 1H), 8.08 (dd,  $J = 8.0, 1.5$  Hz, 1H), 7.90 (dd,  $J = 7.9, 1.5$  Hz, 1H), 7.55 (td,  $J = 7.6, 1.5$  Hz, 1H), 7.51 (dd,  $J = 8.8, 1.3$  Hz, 1H), 7.49 – 7.42 (m, 1H), 7.16 (d,  $J = 7.4$  Hz, 3H), 7.14 – 7.08 (m, 2H), 7.08 – 7.04 (m, 1H), 6.41 (s, 1H), 3.34 – 3.14 (m,

2H), 1.49 (s, 3H).

$^{13}\text{C}$  NMR (101 MHz, Chloroform-*d*)  $\delta$  206.1, 169.8, 147.3, 142.3, 141.7, 139.8, 135.2, 133.4, 130.2, 129.6, 128.8, 128.1, 126.3, 125.5, 124.5, 124.5, 124.4, 124.4, 123.8, 119.7, 119.2, 117.3, 113.4, 101.4, 54.8, 42.7, 22.0.

$^{19}\text{F}$  NMR (376 MHz,  $\text{CDCl}_3$ )  $\delta$  -61.9.

HRMS (ESI-TOF)  $m/z$  :  $[\text{M}+\text{H}]^+$  Calcd for  $\text{C}_{28}\text{H}_{20}\text{F}_3\text{N}_2\text{O}^+$  457.1522; Found: 457.1531.

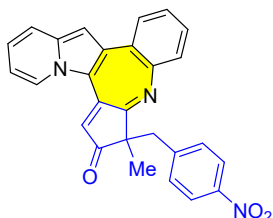

The compound **3ha** was obtained as a yellow solid (26.4 mg, 61% yield).

Melting point 273-278 °C.

$^1\text{H}$  NMR (500 MHz, Chloroform-*d*)  $\delta$  8.25 (d,  $J$  = 7.3 Hz, 1H), 8.11 (d,  $J$  = 8.1 Hz, 1H), 7.91 (d,  $J$  = 7.7 Hz, 1H), 7.77 (d,  $J$  = 8.4 Hz, 2H), 7.61 – 7.52 (m, 2H), 7.48 (t,  $J$  = 7.5 Hz, 1H), 7.21 (s, 1H), 7.18 (d,  $J$  = 8.3 Hz, 2H), 7.14 – 7.07 (m, 1H), 6.78 (t,  $J$  = 6.9 Hz, 1H), 6.47 (s, 1H), 3.37 – 3.20 (m, 2H), 1.51 (s, 3H).

$^{13}\text{C}$  NMR (125 MHz, Chloroform-*d*)  $\delta$  206.2, 169.6, 147.6, 146.9, 145.9, 142.5, 140.4, 135.5, 134.1, 131.2, 130.1, 129.4, 128.6, 126.7, 126.0, 124.4, 123.2, 119.8, 119.6, 117.7, 113.9, 102.0, 55.0, 42.6, 22.8.

HRMS (ESI-TOF)  $m/z$  :  $[\text{M}+\text{H}]^+$  Calcd for  $\text{C}_{27}\text{H}_{20}\text{N}_3\text{O}_3^+$  434.1499; Found: 434.1511.

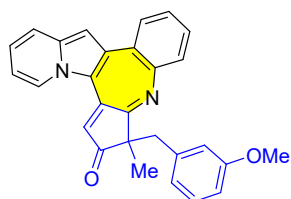

The compound **3ia** was obtained as a yellow solid (26.2 mg, 63% yield).  
Melting point 175-181 °C.

$^1\text{H}$  NMR (400 MHz, Chloroform-*d*)  $\delta$  8.08 (d,  $J$  = 7.3 Hz, 1H), 8.04 (d,  $J$  = 8.1 Hz, 1H), 7.90 (d,  $J$  = 8.0 Hz, 1H), 7.56 – 7.50 (m, 1H), 7.48 (d,  $J$  = 10.1 Hz, 1H), 7.42 (t,  $J$  = 6.8 Hz, 1H), 7.11 (s, 1H), 7.08 – 7.00 (m, 1H), 6.86 (t,  $J$  = 7.8 Hz, 1H), 6.70 (t,  $J$  = 6.9 Hz, 1H), 6.66 – 6.59 (m, 1H), 6.48 (s, 1H), 6.45 – 6.40 (m, 1H), 6.39 (s, 1H), 3.28 (s, 3H), 3.25 – 3.11 (m, 2H), 1.48 (s, 3H).

$^{13}\text{C}$  NMR (101 MHz, Chloroform-*d*)  $\delta$  206.6, 170.7, 158.7, 147.4, 142.5, 139.5, 139.0, 135.1, 133.2, 129.4, 128.6, 128.1, 126.4, 125.7, 123.4, 122.4, 120.4, 119.1, 117.4, 114.5, 113.0, 112.7, 101.1, 55.2, 54.6, 43.6, 29.7, 21.6.

HRMS (ESI-TOF)  $m/z$  :  $[\text{M}+\text{H}]^+$  Calcd for  $\text{C}_{28}\text{H}_{23}\text{N}_2\text{O}_2^+$  419.1754; Found: 419.1747.

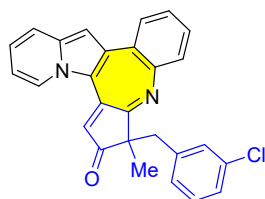

The compound **3ja** was obtained as a yellow solid (36.1 mg, 85% yield).  
Melting point 207-216 °C.

$^1\text{H}$  NMR (400 MHz, Chloroform-*d*)  $\delta$  8.13 (s, 1H), 8.05 (d,  $J$  = 9.6 Hz, 1H), 7.89 (d,  $J$  = 6.5 Hz, 1H), 7.54 (t,  $J$  = 6.8 Hz, 1H), 7.50 (d,  $J$  = 8.8 Hz, 1H), 7.44 (t,  $J$  = 7.6 Hz, 1H), 7.14 (s, 1H), 7.10 – 7.03 (m, 1H), 7.00 (s, 1H), 6.88 (d,  $J$  = 4.7 Hz, 1H), 6.84 (d,  $J$  = 5.4 Hz, 2H), 6.74 (t,  $J$  = 6.9 Hz, 1H), 6.42 (s, 1H), 3.15 (q,  $J$  = 12.7 Hz, 2H), 1.47 (s, 3H).

$^{13}\text{C}$  NMR (101 MHz, Chloroform-*d*)  $\delta$  206.2, 170.0, 147.4, 142.4, 139.7, 139.6, 135.1, 133.5, 133.3, 129.9, 129.5, 128.8, 128.7, 128.2, 128.1, 126.4, 126.3, 125.6, 123.6, 119.9, 119.2, 117.3, 113.2, 101.3, 54.9, 42.8, 21.8.

HRMS (ESI-TOF)  $m/z$  :  $[\text{M}+\text{H}]^+$  Calcd for  $\text{C}_{27}\text{H}_{20}\text{ClN}_2\text{O}^+$  423.1259; Found: 423.1257.

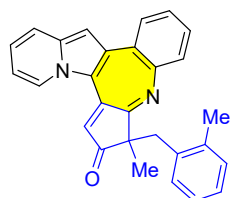

The compound **3ka** was obtained as a yellow solid (27.8 mg, 69% yield).  
Melting point 192-195 °C.

$^1\text{H}$  NMR (400 MHz, Chloroform-*d*)  $\delta$  8.01 (d,  $J$  = 8.0 Hz, 1H), 7.94 (d,  $J$  = 7.3 Hz, 1H), 7.88 (d,  $J$  = 7.9 Hz, 1H), 7.53 (t,  $J$  = 6.8 Hz, 1H), 7.48 – 7.38 (m, 2H), 7.07 (s, 1H), 3.23 – 3.07 (m, 2H), 1.79 (s, 3H), 1.49 (s, 3H).

$^{13}\text{C}$  NMR (101 MHz, Chloroform-*d*)  $\delta$  206.5, 170.8, 147.5, 142.6, 139.4, 137.4, 137.0, 135.0, 133.1, 130.5, 129.4, 128.5, 128.1, 127.5, 127.1, 126.8, 126.4, 125.5, 123.2, 120.5, 119.0, 117.4, 112.8, 101.0, 55.5, 43.9, 21.2, 20.8.

HRMS (ESI-TOF)  $m/z$  :  $[\text{M}+\text{H}]^+$  Calcd for  $\text{C}_{28}\text{H}_{23}\text{N}_2\text{O}^+$  403.1805; Found: 403.1801.



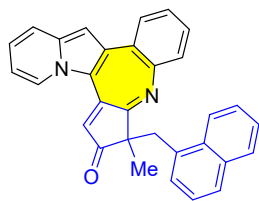

The compound **3la** was obtained as a yellow solid (24.7 mg, 56% yield).

Melting point 241-252 °C.

$^1\text{H NMR}$  (400 MHz, Chloroform-*d*)  $\delta$  8.03 (d,  $J = 9.4$  Hz, 1H), 7.92 (d,  $J = 8.0$  Hz, 1H), 7.85 (d,  $J = 9.4$  Hz, 1H), 7.53 – 7.48 (m, 1H), 7.39 (d,  $J = 8.0$  Hz, 1H), 7.35 (d,  $J = 8.9$  Hz, 1H), 7.32 (d,  $J = 7.6$  Hz, 2H), 7.29 (d,  $J = 8.2$

Hz, 1H), 7.17 (d,  $J = 7.1$  Hz, 1H), 7.07 – 7.02 (m, 2H), 7.00 (d,  $J = 7.1$  Hz, 1H), 6.98 – 6.93 (m, 1H), 6.92 (s, 1H), 3.75 – 3.59 (m, 2H), 1.62 (s, 3H).

$^{13}\text{C NMR}$  (101 MHz, Chloroform-*d*)  $\delta$  206.3, 170.7, 147.4, 142.4, 139.1, 134.9, 134.1, 133.3, 132.9, 132.0, 129.2, 128.3, 128.2, 128.1, 127.6, 127.1, 126.5, 125.2, 125.1, 125.0, 124.7, 123.0, 120.6, 118.8, 117.0, 112.5, 100.7, 56.4, 40.9, 20.6.

HRMS (ESI-TOF)  $m/z$  :  $[\text{M}+\text{H}]^+$  Calcd for  $\text{C}_{31}\text{H}_{23}\text{N}_2\text{O}^+$  439.1805; Found: 439.1795.

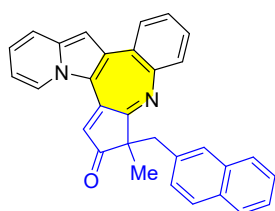

The compound **3ma** was obtained as a yellow solid (22.3 mg, 51% yield).

Melting point 248-255 °C.

$^1\text{H NMR}$  (400 MHz, Chloroform-*d*)  $\delta$  8.00 (d,  $J = 9.5$  Hz, 1H), 7.94 (d,  $J = 7.9$  Hz, 1H), 7.60 (d,  $J = 7.2$  Hz, 1H), 7.56 (t,  $J = 7.5$  Hz, 1H), 7.47 (d,  $J = 8.1$  Hz, 1H), 7.46 – 7.40 (m, 1H), 7.39 (s, 1H), 7.37 – 7.32 (m, 2H), 7.30 (d,  $J = 7.3$  Hz, 1H), 7.21 – 7.15 (m, 1H), 7.15 – 7.09 (m, 2H), 7.02 (s, 1H),

6.91 – 6.84 (m, 1H), 6.31 (t,  $J = 6.9$  Hz, 1H), 6.22 (s, 1H), 3.43 – 3.27 (m, 2H), 1.55 (s, 3H).

$^{13}\text{C NMR}$  (101 MHz, Chloroform-*d*)  $\delta$  205.3, 169.6, 146.5, 141.5, 138.3, 134.0, 133.9, 132.1, 131.8, 131.0, 128.3, 127.4, 127.1, 126.1, 126.1, 125.9, 125.4, 124.4, 124.0, 123.7, 122.2, 119.2, 117.8, 116.2, 111.7, 100.0, 54.7, 42.9, 20.3.

HRMS (ESI-TOF)  $m/z$  :  $[\text{M}+\text{H}]^+$  Calcd for  $\text{C}_{31}\text{H}_{23}\text{N}_2\text{O}^+$  439.1805; Found: 439.1805.

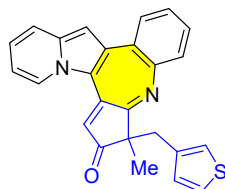

The compound **3na** was obtained as a yellow solid (14.2 mg, 36% yield).

Melting point 224-228 °C.

$^1\text{H NMR}$  (400 MHz, Chloroform-*d*)  $\delta$  8.27 (d,  $J = 7.3$  Hz, 1H), 8.09 (d,  $J = 8.0$  Hz, 1H), 7.89 (d,  $J = 7.9$  Hz, 1H), 7.53 (d,  $J = 8.7$  Hz, 2H), 7.44 (t,  $J = 7.6$  Hz, 1H), 7.18 (s, 1H), 7.07 (dd,  $J = 8.9, 6.6$  Hz, 1H), 6.85 (dd,  $J = 5.0, 3.0$  Hz, 1H),

6.82 – 6.73 (m, 2H), 6.69 (d,  $J = 4.9$  Hz, 1H), 6.49 (s, 1H), 3.34 – 3.14 (m, 2H), 1.45 (s, 3H).

$^{13}\text{C NMR}$  (101 MHz, Chloroform-*d*)  $\delta$  205.9, 169.6, 146.2, 141.5, 138.6, 136.7, 134.2, 132.3, 128.5, 128.4, 127.6, 127.0, 125.3, 124.8, 123.2, 122.4, 121.7, 119.0, 118.2, 116.4, 112.1, 100.2, 53.4, 36.3, 20.6.

HRMS (ESI-TOF)  $m/z$  :  $[\text{M}+\text{H}]^+$  Calcd for  $\text{C}_{25}\text{H}_{19}\text{N}_2\text{OS}^+$  395.1213; Found: 395.1213.

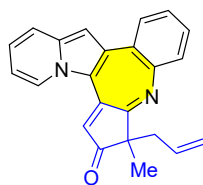

The compound **3oa** was obtained as a yellow solid (24.8 mg, 73% yield). Melting point 200-207 °C.

$^1\text{H NMR}$  (400 MHz, Chloroform-*d*)  $\delta$  8.63 (d,  $J = 7.2$  Hz, 1H), 8.12 (d,  $J = 9.6$  Hz, 1H), 7.84 (dd,  $J = 7.9, 1.5$  Hz, 1H), 7.60 (dt,  $J = 8.9, 1.3$  Hz, 1H), 7.52 (td,  $J = 7.6, 1.6$  Hz, 1H), 7.45 (ddd,  $J = 8.7, 7.2, 1.6$  Hz, 1H), 7.26 (s, 1H), 7.14 (ddd,  $J = 8.9,$

6.6, 0.9 Hz, 1H), 6.89 (td,  $J = 6.9, 1.4$  Hz, 1H), 6.75 (s, 1H), 5.66 (ddt,  $J = 17.4, 10.1, 7.4$  Hz, 1H), 5.03 (ddt,  $J = 17.0, 2.5, 1.3$  Hz, 1H), 4.93 – 4.83 (m, 1H), 2.75 – 2.56 (m, 2H), 1.38 (s, 3H).

$^{13}\text{C NMR}$  (101 MHz, Chloroform-*d*)  $\delta$  207.2, 170.5, 146.8, 142.5, 139.7, 135.4, 133.7, 133.5, 129.5, 128.6, 127.9, 126.2, 126.0, 123.5, 119.4, 119.4, 118.0, 117.6, 113.4, 101.3, 52.5, 41.1, 21.6.

HRMS (ESI-TOF)  $m/z$  :  $[M+H]^+$  Calcd for  $C_{23}H_{19}N_2O^+$  339.1492; Found: 339.1482.

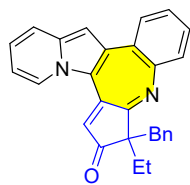

The compound **3pa** was obtained as a yellow solid (23.5 mg, 58% yield). Melting point 189-192 °C.

$^1H$  NMR (400 MHz, Chloroform-*d*)  $\delta$  8.09 (d,  $J = 7.2$  Hz, 1H), 8.04 (d,  $J = 9.5$  Hz, 1H), 7.91 (d,  $J = 7.9$  Hz, 1H), 7.54 (t,  $J = 7.5$  Hz, 1H), 7.48 – 7.39 (m, 2H), 7.11 (s, 1H), 7.05 – 6.95 (m, 3H), 6.88 (d,  $J = 7.0$  Hz, 3H), 6.68 (d,  $J = 6.9$  Hz, 1H), 6.48 (s, 1H), 3.26 – 3.09 (m, 2H), 2.16 – 1.98 (m, 2H), 0.77 (t,  $J = 7.4$  Hz, 3H).

$^{13}C$  NMR (101 MHz, Chloroform-*d*)  $\delta$  206.4, 169.7, 148.8, 142.5, 139.5, 137.3, 135.3, 133.3, 130.0, 129.5, 128.6, 128.0, 127.5, 126.2, 126.2, 125.7, 123.3, 121.9, 119.1, 117.3, 112.9, 101.1, 59.8, 43.1, 29.3, 9.0.

HRMS (ESI-TOF)  $m/z$  :  $[M+H]^+$  Calcd for  $C_{28}H_{23}N_2O^+$  403.1805; Found: 403.1805.

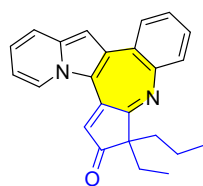

The compound **3qa** was obtained as a yellow solid (6.2 mg, 18% yield). Melting point 201-210 °C.

$^1H$  NMR (400 MHz, Chloroform-*d*)  $\delta$  8.64 (d,  $J = 7.2$  Hz, 1H), 8.12 (d,  $J = 8.0$  Hz, 1H), 7.83 (d,  $J = 9.5$  Hz, 1H), 7.59 (d,  $J = 8.9$  Hz, 1H), 7.51 (t,  $J = 7.5$  Hz, 1H), 7.43 (t,  $J = 7.6$  Hz, 1H), 7.17 – 7.08 (m, 1H), 6.88 (t,  $J = 7.7$  Hz, 1H), 6.85 (s, 1H),

2.01 – 1.75 (m, 4H), 1.12 (dddd,  $J = 26.4, 19.3, 9.9, 4.6$  Hz, 2H), 0.79 (t,  $J = 7.3$  Hz, 3H), 0.70 (t,  $J = 7.4$  Hz, 3H).

$^{13}C$  NMR (101 MHz, Chloroform-*d*)  $\delta$  208.1, 170.6, 148.4, 142.6, 139.7, 135.6, 133.7, 129.5, 128.5, 127.9, 126.1, 123.5, 121.5, 119.4, 117.4, 113.4, 101.3, 57.3, 39.1, 29.7, 17.8, 14.6, 8.8.

HRMS (ESI-TOF)  $m/z$  :  $[M+H]^+$  Calcd for  $C_{24}H_{23}N_2O^+$  355.1805; Found: 355.1804.

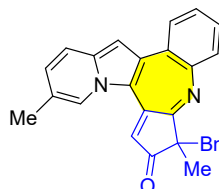

The compound **3ab** was obtained as a yellow solid (27.6 mg, 68% yield).

Melting point 214-219 °C.

$^1H$  NMR (400 MHz, Chloroform-*d*)  $\delta$  7.98 (dd,  $J = 8.1, 1.5$  Hz, 1H), 7.88 (dd,  $J = 7.9, 1.5$  Hz, 1H), 7.82 (s, 1H), 7.54 – 7.47 (m, 1H), 7.39 (td,  $J = 7.7, 7.2, 1.5$  Hz, 1H), 7.32 (dd,  $J = 9.0, 0.9$  Hz, 1H), 7.01 (d,  $J = 5.1$  Hz, 3H), 6.89 (dd,  $J =$

6.9, 1.2 Hz, 3H), 6.85 (dd,  $J = 8.9, 1.3$  Hz, 1H), 6.40 (s, 1H), 3.29 – 3.12 (m, 2H), 2.22 (s, 3H), 1.48 (s, 3H).

$^{13}C$  NMR (101 MHz, Chloroform-*d*)  $\delta$  206.8, 170.3, 147.4, 142.3, 138.4, 137.6, 135.2, 132.8, 129.9, 129.2, 128.5, 127.9, 127.5, 126.6, 126.4, 126.2, 123.6, 122.7, 119.9, 118.4, 117.2, 100.9, 55.1, 43.4, 21.7, 18.6.

HRMS (ESI-TOF)  $m/z$  :  $[M+H]^+$  Calcd for  $C_{28}H_{23}N_2O^+$  403.1805; Found: 403.1807.

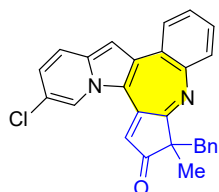

The compound **3ac** was obtained as a yellow solid (25.6 mg, 62% yield).

Melting point 212-218 °C.

$^1H$  NMR (400 MHz, Chloroform-*d*)  $\delta$  8.08 (d,  $J = 7.3$  Hz, 1H), 8.05 (d,  $J = 8.1$  Hz, 1H), 7.90 (d,  $J = 9.5$  Hz, 1H), 7.58 – 7.50 (m, 1H), 7.48 (d,  $J = 8.8$  Hz, 1H), 7.43 (t,  $J = 6.8$  Hz, 1H), 7.12 (s, 1H), 7.04 (d,  $J = 6.6$  Hz, 1H), 7.00 (dd,  $J = 7.4,$

2.5 Hz, 2H), 6.92 – 6.85 (m, 3H), 6.69 (t,  $J = 7.6$  Hz, 1H), 6.41 (s, 1H), 3.28 – 3.12 (m, 2H), 1.48 (s, 3H).

$^{13}\text{C}$  NMR (101 MHz, Chloroform-*d*)  $\delta$  206.8, 170.5, 147.4, 142.5, 139.5, 137.5, 135.2, 133.3, 129.9, 129.5, 128.6, 128.0, 127.6, 126.3, 126.2, 125.7, 123.4, 120.2, 119.1, 117.4, 113.0, 101.1, 55.0, 43.4, 21.7.

HRMS (ESI-TOF)  $m/z$  :  $[\text{M}+\text{H}]^+$  Calcd for  $\text{C}_{27}\text{H}_{20}\text{ClN}_2\text{O}^+$  423.1259; Found: 423.1284.

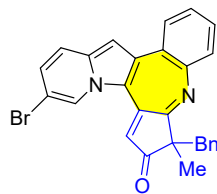

The compound **3ad** was obtained as a yellow solid (33.6 mg, 72% yield).

Melting point 216-221 °C.

$^1\text{H}$  NMR (400 MHz, Chloroform-*d*)  $\delta$  8.08 (d,  $J$  = 7.2 Hz, 1H), 8.04 (d,  $J$  = 6.5 Hz, 1H), 7.90 (d,  $J$  = 6.4 Hz, 1H), 7.57 – 7.50 (m, 1H), 7.47 (d,  $J$  = 8.8 Hz, 1H), 7.45 – 7.38 (m, 1H), 7.11 (s, 1H), 7.03 (d,  $J$  = 8.9 Hz, 1H), 7.00 (d,  $J$  = 7.6 Hz, 2H), 6.93 – 6.86 (m, 3H), 6.68 (t,  $J$  = 7.0 Hz, 1H), 6.40 (s, 1H), 3.27 – 3.12 (m, 2H), 1.48 (s, 3H).

$^{13}\text{C}$  NMR (101 MHz, Chloroform-*d*)  $\delta$  206.8, 170.5, 147.4, 142.5, 139.5, 137.5, 135.2, 133.3, 129.9, 129.5, 128.6, 128.0, 127.6, 126.3, 126.2, 125.7, 123.4, 120.2, 119.1, 117.4, 113.0, 101.1, 55.0, 43.4, 21.7.

HRMS (ESI-TOF)  $m/z$  :  $[\text{M}+\text{H}]^+$  Calcd for  $\text{C}_{27}\text{H}_{20}\text{BrN}_2\text{O}^+$  467.0754; Found: 467.0755.

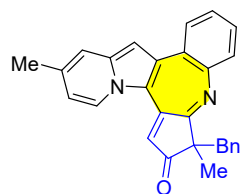

The compound **3ae** was obtained as a yellow solid (26.0 mg, 65% yield).

Melting point 214-219 °C.

$^1\text{H}$  NMR (400 MHz, Chloroform-*d*)  $\delta$  8.06 – 7.95 (m, 2H), 7.89 (d,  $J$  = 7.9 Hz, 1H), 7.57 – 7.49 (m, 1H), 7.46 – 7.38 (m, 1H), 7.20 (s, 1H), 7.01 (d,  $J$  = 5.7 Hz, 2H), 6.97 (s, 1H), 6.95 – 6.86 (m, 3H), 6.51 (d,  $J$  = 7.4 Hz, 1H), 6.34 (s, 1H), 3.27 – 3.11 (m, 2H), 2.33 (s, 3H), 1.47 (s, 3H).

$^{13}\text{C}$  NMR (101 MHz, Chloroform-*d*)  $\delta$  206.6, 170.5, 147.1, 142.5, 140.1, 137.6, 135.2, 134.6, 133.6, 129.9, 129.4, 128.5, 128.0, 127.5, 126.4, 126.2, 125.3, 119.1, 117.5, 117.0, 115.7, 99.9, 54.9, 43.3, 21.8, 21.1.

HRMS (ESI-TOF)  $m/z$  :  $[\text{M}+\text{H}]^+$  Calcd for  $\text{C}_{28}\text{H}_{23}\text{N}_2\text{O}^+$  403.1805; Found: 403.1801.

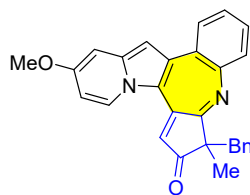

The compound **3af** was obtained as a yellow solid (32.6 mg, 78% yield).

Melting point 195-200 °C.

$^1\text{H}$  NMR (400 MHz, Chloroform-*d*)  $\delta$  7.98 (d,  $J$  = 7.8 Hz, 2H), 7.89 (d,  $J$  = 7.9 Hz, 1H), 7.57 – 7.48 (m, 1H), 7.41 (t,  $J$  = 6.8 Hz, 1H), 7.01 (dd,  $J$  = 6.5, 3.1 Hz, 2H), 6.94 – 6.87 (m, 4H), 6.68 (d,  $J$  = 2.6 Hz, 1H), 6.40 (dd,  $J$  = 7.8, 2.7 Hz, 1H), 6.25 (s, 1H), 3.86 (s, 3H), 3.28 – 3.09 (m, 2H), 1.47 (s, 3H).

$^{13}\text{C}$  NMR (101 MHz, Chloroform-*d*)  $\delta$  206.3, 170.8, 156.5, 146.8, 142.6, 141.6, 137.6, 135.2, 134.4, 130.0, 129.5, 128.5, 127.9, 127.5, 127.2, 126.2, 126.2, 117.8, 116.7, 107.7, 99.5, 95.9, 55.6, 54.9, 43.3, 21.9.

HRMS (ESI-TOF)  $m/z$  :  $[\text{M}+\text{H}]^+$  Calcd for  $\text{C}_{28}\text{H}_{23}\text{N}_2\text{O}_2^+$  419.1754; Found: 419.1751.

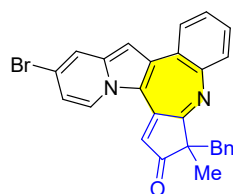

The compound **3ag** was obtained as a yellow solid (24.2 mg, 52% yield).

Melting point 210-223 °C.

$^1\text{H}$  NMR (500 MHz, Chloroform-*d*)  $\delta$  8.10 (d,  $J$  = 7.2 Hz, 1H), 8.07 (d,  $J$  = 8.0 Hz, 1H), 7.90 (s, 1H), 7.54 (t,  $J$  = 7.5 Hz, 1H), 7.50 (d,  $J$  = 8.8 Hz, 1H), 7.45 (d,  $J$  = 7.7 Hz, 1H), 7.15 (s, 1H), 7.05 (dd,  $J$  = 8.8, 6.6 Hz, 1H), 6.99 (dd,  $J$  = 7.2,

2.3 Hz, 2H), 6.89 (d,  $J = 6.3$  Hz, 3H), 6.70 (t,  $J = 6.9$  Hz, 1H), 6.41 (s, 1H), 3.27 – 3.12 (m, 2H), 1.48 (s, 3H).

$^{13}\text{C}$  NMR (126 MHz, Chloroform- $d$ )  $\delta$  207.1, 170.9, 147.8, 142.9, 139.9, 137.9, 135.6, 133.6, 130.3, 129.8, 129.0, 128.4, 127.9, 126.7, 126.6, 126.1, 123.7, 120.6, 119.5, 117.8, 113.3, 101.5, 55.4, 43.8, 22.0.

HRMS (ESI-TOF)  $m/z$  :  $[\text{M}+\text{H}]^+$  Calcd for  $\text{C}_{27}\text{H}_{20}\text{BrN}_2\text{O}^+$  467.0754; Found: 467.0764.

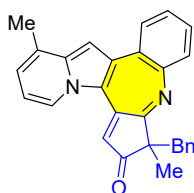

The compound **3ah** was obtained as a yellow solid (18.6 mg, 46% yield). Melting point 214-221 °C.

$^1\text{H}$  NMR (400 MHz, Chloroform- $d$ )  $\delta$  8.09 (d,  $J = 8.0$  Hz, 1H), 7.96 (d,  $J = 7.2$  Hz, 1H), 7.90 (d,  $J = 6.4$  Hz, 1H), 7.53 (t,  $J = 7.6$  Hz, 1H), 7.43 (t,  $J = 8.3$  Hz, 1H), 7.10 (s, 1H), 7.00 (d,  $J = 6.7$  Hz, 2H), 6.89 (d,  $J = 5.4$  Hz, 3H), 6.83 (d,  $J = 6.7$  Hz, 1H), 6.62 (t,  $J = 7.0$  Hz, 1H), 6.39 (s, 1H), 3.28 – 3.12 (m, 2H), 2.48 (s, 3H), 1.48 (s, 3H).

$^{13}\text{C}$  NMR (101 MHz, Chloroform- $d$ )  $\delta$  206.7, 170.6, 147.6, 142.5, 140.3, 137.5, 135.2, 132.8, 129.9, 129.4, 128.5, 128.2, 128.0, 127.6, 126.4, 126.2, 123.7, 122.7, 120.2, 117.9, 113.0, 99.5, 55.0, 43.4, 21.7, 18.1.

HRMS (ESI-TOF)  $m/z$  :  $[\text{M}+\text{H}]^+$  Calcd for  $\text{C}_{28}\text{H}_{23}\text{N}_2\text{O}^+$  403.1805; Found: 403.1800.

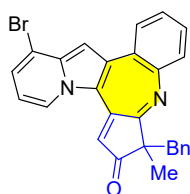

The compound **3aj** was obtained as a yellow solid (35.0 mg, 75% yield). Melting point 204-212 °C.

$^1\text{H}$  NMR (400 MHz, Chloroform- $d$ )  $\delta$  8.08 (d,  $J = 7.2$  Hz, 1H), 8.04 (d,  $J = 8.1$  Hz, 1H), 7.90 (d,  $J = 7.9$  Hz, 1H), 7.59 – 7.50 (m, 1H), 7.47 (d,  $J = 8.8$  Hz, 1H), 7.44 (s, 1H), 7.12 (s, 1H), 7.04 (d,  $J = 6.6$  Hz, 1H), 7.00 (d,  $J = 7.5$  Hz, 2H), 6.89 (d,  $J = 5.4$  Hz, 3H), 6.68 (t,  $J = 7.6$  Hz, 1H), 6.41 (s, 1H), 3.28 – 3.11 (m, 2H), 1.48 (s, 3H).

$^{13}\text{C}$  NMR (101 MHz, Chloroform- $d$ )  $\delta$  206.8, 170.5, 147.4, 142.5, 139.5, 137.5, 135.2, 133.3, 129.9, 129.5, 128.6, 128.0, 127.6, 126.3, 126.2, 125.7, 123.4, 120.2, 119.1, 117.4, 113.0, 101.1, 55.0, 43.4, 21.7.

HRMS (ESI-TOF)  $m/z$  :  $[\text{M}+\text{H}]^+$  Calcd for  $\text{C}_{27}\text{H}_{20}\text{BrN}_2\text{O}^+$  467.0754; Found: 467.0763.

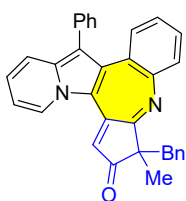

The compound **3ak** was obtained as a yellow solid (38.6mg, 83% yield). Melting point 193-194 °C.

$^1\text{H}$  NMR (400 MHz, Chloroform- $d$ )  $\delta$  7.95 (d,  $J = 7.2$  Hz, 1H), 7.77 (d,  $J = 6.4$  Hz, 1H), 7.52 – 7.44 (m, 3H), 7.40 (d,  $J = 7.9$  Hz, 1H), 7.37 (d,  $J = 7.8$  Hz, 3H), 7.32 (d,  $J = 8.1$  Hz, 1H), 7.04 (dd,  $J = 9.0, 6.6$  Hz, 1H), 6.95 (d,  $J = 7.1$  Hz, 3H), 6.72 (t,  $J = 8.3$  Hz, 3H), 6.67 (d,  $J = 5.8$  Hz, 1H), 6.30 (s, 1H), 3.26 – 3.12 (m, 2H), 1.53 (s, 3H).

$^{13}\text{C}$  NMR (101 MHz, Chloroform- $d$ )  $\delta$  206.1, 172.0, 147.7, 144.0, 139.3, 137.3, 134.8, 132.8, 132.3, 130.7, 129.7, 129.6, 129.2, 128.7, 127.3, 127.2, 126.7, 126.3, 125.9, 124.4, 123.5, 121.4, 118.7, 118.1, 117.3, 113.7, 56.2, 44.3, 21.0.

HRMS (ESI-TOF)  $m/z$  :  $[\text{M}+\text{H}]^+$  Calcd for  $\text{C}_{33}\text{H}_{25}\text{N}_2\text{O}^+$  465.1962; Found: 469.1952.

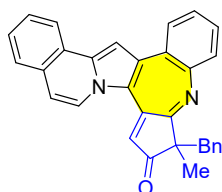

The compound **3al** was obtained as a yellow solid (21.9mg, 50% yield).

Melting point 124-136 °C.

$^1\text{H}$  NMR (400 MHz, Chloroform- $d$ )  $\delta$  8.06 (dd,  $J = 8.0, 1.6$  Hz, 2H), 7.91 (dd,  $J = 7.9, 1.5$  Hz, 1H), 7.70 (d,  $J = 7.7$  Hz, 1H), 7.59 – 7.47 (m, 6H), 7.44 (td,  $J =$

7.6, 1.7 Hz, 1H), 7.06 – 6.99 (m, 2H), 6.91 (dd,  $J = 8.9, 6.9$  Hz, 3H), 6.76 (d,  $J = 7.6$  Hz, 1H), 6.36 (s, 1H), 3.29 – 3.14 (m, 2H), 1.50 (s, 3H).

$^{13}\text{C}$  NMR (101 MHz, Chloroform-*d*)  $\delta$  206.6, 170.5, 147.7, 142.6, 137.5, 137.5, 135.3, 132.1, 129.9, 129.3, 128.6, 128.3, 128.0, 127.8, 127.6, 127.0, 126.8, 126.4, 126.4, 124.5, 123.4, 122.7, 121.1, 119.3, 112.6, 100.6, 55.3, 43.6, 21.5.

HRMS (ESI-TOF)  $m/z$  :  $[\text{M}+\text{H}]^+$  Calcd for  $\text{C}_{31}\text{H}_{23}\text{N}_2\text{O}^+$  439.1805; Found: 439.1808.

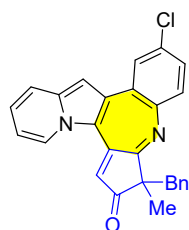

The compound **3am** was obtained as a yellow solid (20.0 mg, 47% yield). Melting point 233-237 °C.

$^1\text{H}$  NMR (400 MHz, Chloroform-*d*)  $\delta$  8.07 (d,  $J = 6.1$  Hz, 1H), 7.96 (d,  $J = 2.4$  Hz, 1H), 7.81 (d,  $J = 8.5$  Hz, 1H), 7.50 – 7.43 (m, 2H), 7.07 – 7.03 (m, 2H), 6.98 (d,  $J = 5.8$  Hz, 2H), 6.90 (d,  $J = 6.8$  Hz, 3H), 6.72 (d,  $J = 8.5$  Hz, 1H), 6.41 (s, 1H), 3.24 – 3.12 (m, 2H), 1.46 (s, 3H).

$^{13}\text{C}$  NMR (101 MHz, Chloroform-*d*)  $\delta$  206.6, 170.8, 147.1, 141.0, 139.5, 137.4, 136.6, 134.1, 131.7, 129.9, 129.9, 129.3, 127.8, 127.6, 127.6, 126.3, 125.7, 123.5, 120.7, 119.3, 117.4, 113.3, 101.3, 55.0, 43.4, 21.7.

HRMS (ESI-TOF)  $m/z$  :  $[\text{M}+\text{H}]^+$  Calcd for  $\text{C}_{27}\text{H}_{20}\text{ClN}_2\text{O}^+$  423.1259; Found: 423.1261.

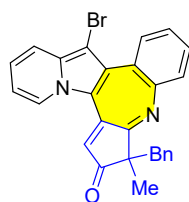

The compound **4** was obtained as a yellow solid (40.1 mg, 86% yield). Melting point 205-211 °C.

$^1\text{H}$  NMR (400 MHz, Chloroform-*d*)  $\delta$  8.54 (dd,  $J = 7.9, 1.6$  Hz, 1H), 7.77 (dd,  $J = 7.9, 1.6$  Hz, 1H), 7.68 (dt,  $J = 8.9, 1.2$  Hz, 1H), 7.55 (td,  $J = 7.5, 1.6$  Hz, 1H), 7.47 (td,  $J = 7.6, 1.6$  Hz, 1H), 7.21 (ddd,  $J = 8.9, 6.7, 1.0$  Hz, 1H), 6.91 – 6.85 (m, 2H), 6.77 (ddd,  $J = 14.1, 7.7, 6.0$  Hz, 3H), 6.66 (td,  $J = 6.9, 1.4$  Hz, 1H), 6.34 (d,  $J = 6.9$  Hz, 1H), 3.19 (s, 2H), 1.58 (s, 3H).

$^{13}\text{C}$  NMR (101 MHz, Chloroform-*d*)  $\delta$  198.1, 171.2, 147.3, 144.4, 137.3, 136.9, 132.9, 130.5, 129.7, 129.3, 129.2, 129.1, 127.7, 127.4, 127.3, 125.2, 123.8, 118.9, 117.4, 116.4, 112.1, 90.2, 58.2, 44.9, 20.8.

HRMS (ESI-TOF)  $m/z$  :  $[\text{M}+\text{H}]^+$  Calcd for  $\text{C}_{27}\text{H}_{20}\text{BrN}_2\text{O}^+$  467.0754; Found: 467.0767.

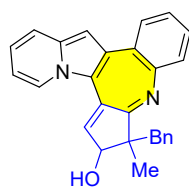

The compound **5** was obtained as a yellow solid (14.3 mg, 36% yield). Melting point 233-237 °C.

$^1\text{H}$  NMR (400 MHz, Chloroform-*d*)  $\delta$  7.89 (d,  $J = 7.2$  Hz, 1H), 7.85 (dd,  $J = 7.9, 1.7$  Hz, 1H), 7.57 – 7.51 (m, 1H), 7.41 (d,  $J = 8.9$  Hz, 1H), 7.30 (dd,  $J = 7.7, 1.7$  Hz, 2H), 7.25 (s, 2H), 7.03 – 6.95 (m, 3H), 6.89 (s, 1H), 6.79 (dd,  $J = 8.9, 6.5$  Hz, 1H), 6.55 – 6.49 (m, 1H), 6.44 (d,  $J = 2.9$  Hz, 1H), 4.80 – 4.58 (m, 1H), 3.33 – 2.96 (m, 2H), 1.33 (s, 3H).

$^{13}\text{C}$  NMR (101 MHz, Chloroform-*d*)  $\delta$  174.6, 143.0, 139.3, 136.2, 133.8, 133.6, 131.4, 130.5, 129.9, 128.3, 128.2, 128.1, 128.0, 127.6, 127.6, 127.2, 126.0, 123.4, 119.4, 118.9, 116.5, 111.4, 98.8, 56.2, 40.7, 23.2.

HRMS (ESI-TOF)  $m/z$  :  $[\text{M}+\text{H}]^+$  Calcd for  $\text{C}_{27}\text{H}_{23}\text{N}_2\text{O}^+$  391.1805; Found: 391.1797.

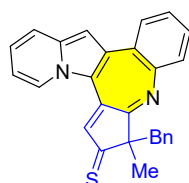

The compound **6** was obtained as a yellow solid (24.6 mg, 61% yield). Melting point 206-212 °C.

$^1\text{H}$  NMR (400 MHz, Chloroform-*d*)  $\delta$  8.18 (d,  $J = 7.2$  Hz, 1H), 8.09 (dd,  $J = 8.1, 1.5$  Hz, 1H), 7.96 (dd,  $J = 7.9, 1.5$  Hz, 1H), 7.59 (td,  $J = 7.5, 1.5$  Hz, 1H), 7.54 –

7.45 (m, 2H), 7.20 (d,  $J = 3.8$  Hz, 2H), 7.14 (dd,  $J = 8.9, 6.6$  Hz, 1H), 6.98 – 6.91 (m, 2H), 6.84 – 6.79 (m, 3H), 6.73 (td,  $J = 6.9, 1.4$  Hz, 1H), 3.44 – 3.20 (m, 2H), 1.60 (s, 3H).

$^{13}\text{C}$  NMR (101 MHz, Chloroform-*d*)  $\delta$  234.2, 172.5, 141.3, 141.3, 139.3, 136.4, 134.6, 134.0, 133.4, 128.9, 128.8, 127.7, 126.9, 126.2, 125.6, 125.2, 125.2, 123.5, 118.2, 116.8, 112.4, 101.2, 62.8, 45.4, 23.7.

HRMS (ESI-TOF)  $m/z$  :  $[\text{M}+\text{H}]^+$  Calcd for  $\text{C}_{27}\text{H}_{21}\text{N}_2\text{S}^+$  405.1420; Found: 405.1429.

## 9. X-ray crystallographic analysis

Single crystals of **3ah** suitable for X-ray analysis were obtained by diffusion method of *n*-hexane/DCM.

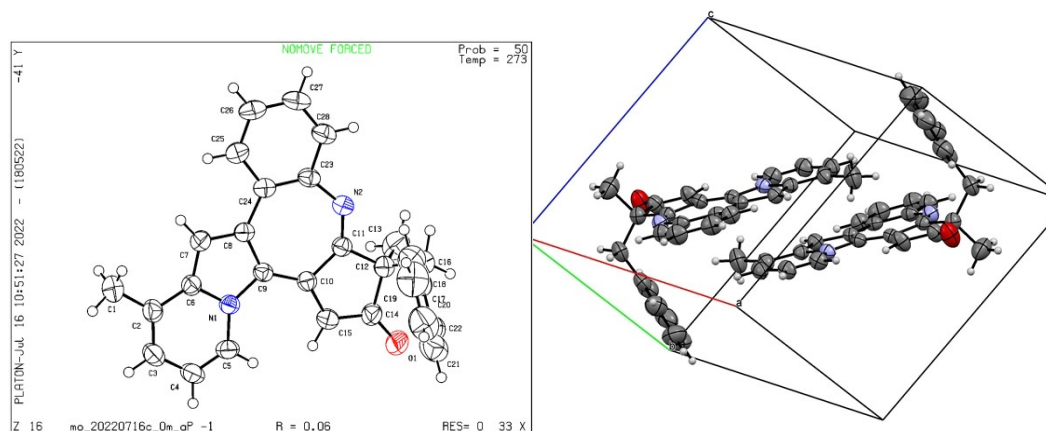

Figure S2. X-ray structure (at 50% probability level) and packing structure of **3ah**.

Bond precision: C-C = 0.0038 Å

Wavelength=0.71073

Cell: a=9.820(4) b=10.002(5) c=11.566(5)

$\alpha$ =74.516(14)  $\beta$ =81.314(13)  $\gamma$ =76.320(13)

Temperature: 273 K

| Calculated             | Reported                                                     |                                                  |
|------------------------|--------------------------------------------------------------|--------------------------------------------------|
| Volume                 | 1059.0(8)                                                    | 1059.1(8)                                        |
| Space group            | P -1                                                         | P -1                                             |
| Hall group             | -P 1                                                         | -P 1                                             |
| Moiety formula         | C <sub>28</sub> H <sub>22</sub> N <sub>2</sub> O [+ solvent] | C <sub>28</sub> H <sub>22</sub> N <sub>2</sub> O |
| Sum formula            | C <sub>28</sub> H <sub>22</sub> N <sub>2</sub> O [+ solvent] | C <sub>28</sub> H <sub>21</sub> N <sub>2</sub> O |
| Mr                     | 402.48                                                       | 401.47                                           |
| Dx, g/cm <sup>3</sup>  | 1.262                                                        | 1.259                                            |
| Z                      | 2                                                            | 2                                                |
| Mu (mm <sup>-1</sup> ) | 0.077                                                        | 0.077                                            |
| F000                   | 424.0                                                        | 422.0                                            |
| F000'                  | 424.16                                                       |                                                  |
| h,k,lmax               | 12,13,15                                                     | 12,12,15                                         |
| Nref                   | 4885                                                         | 4849                                             |
| Tmin,Tmax              | 0.984,0.985                                                  | 0.691,0.746                                      |
| Tmin'                  | 0.984                                                        |                                                  |

Correction method= # Reported T Limits: T=0.691 T<sub>max</sub>=0.746

AbsCorr = NONE

Data completeness= 0.993

Theta(max)= 27.562

R(reflections)= 0.0638( 2928)

wR<sub>2</sub>(reflections)=0.1888( 4849)

S = 1.031

Npar= 282

## 10. Photophysical properties

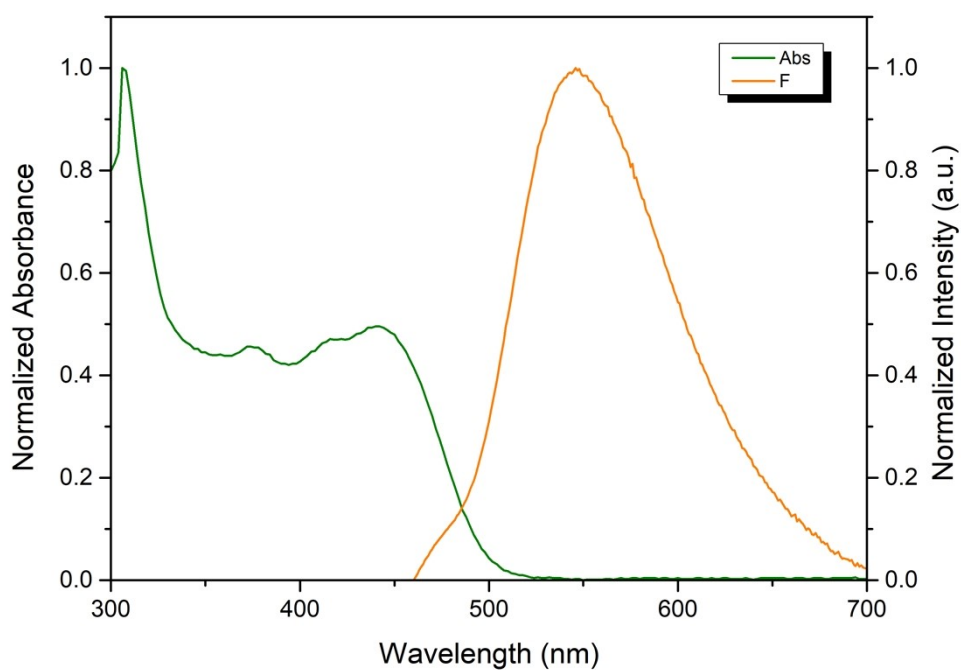

**Figure S3.** Normalized absorption (left) and emission (right) spectra of **3ma** recorded in DCM, excited at 450 nm, QY=19.0%.

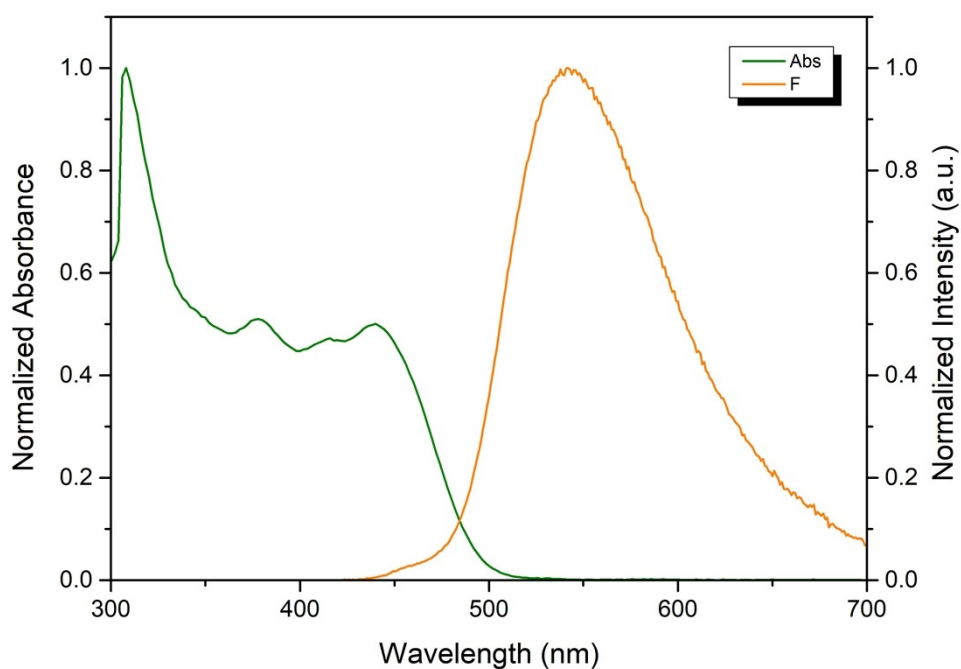

**Figure S4.** Normalized absorption (left) and emission (right) spectra of **3am** recorded in DCM, excited at 450 nm, QY=10.6%.



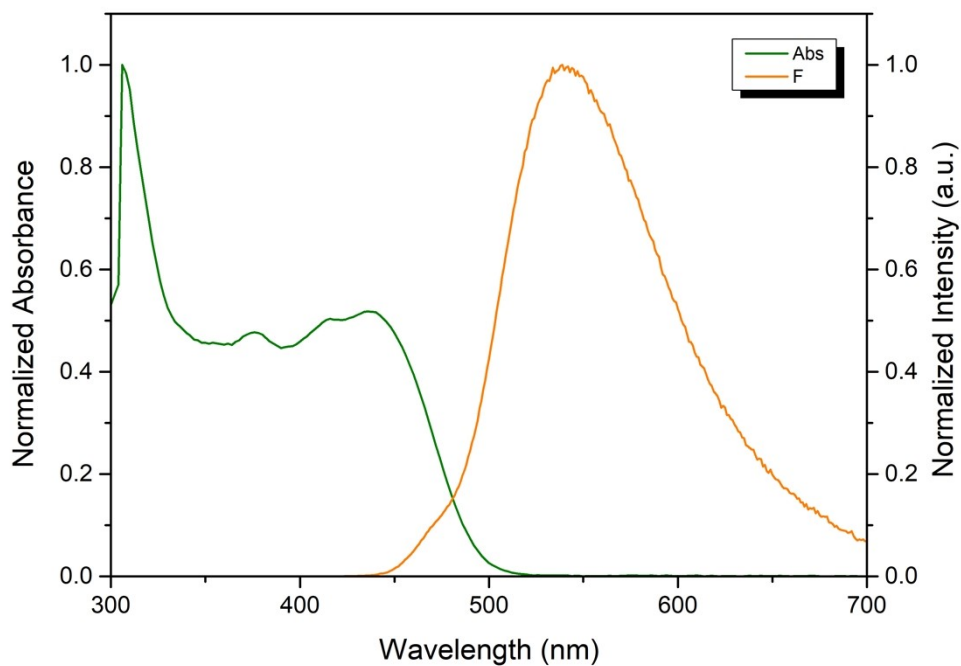

**Figure S5.** Normalized absorption (left) and emission (right) spectra of **3ac** recorded in DCM, excited at 450 nm, QY=15.1%.

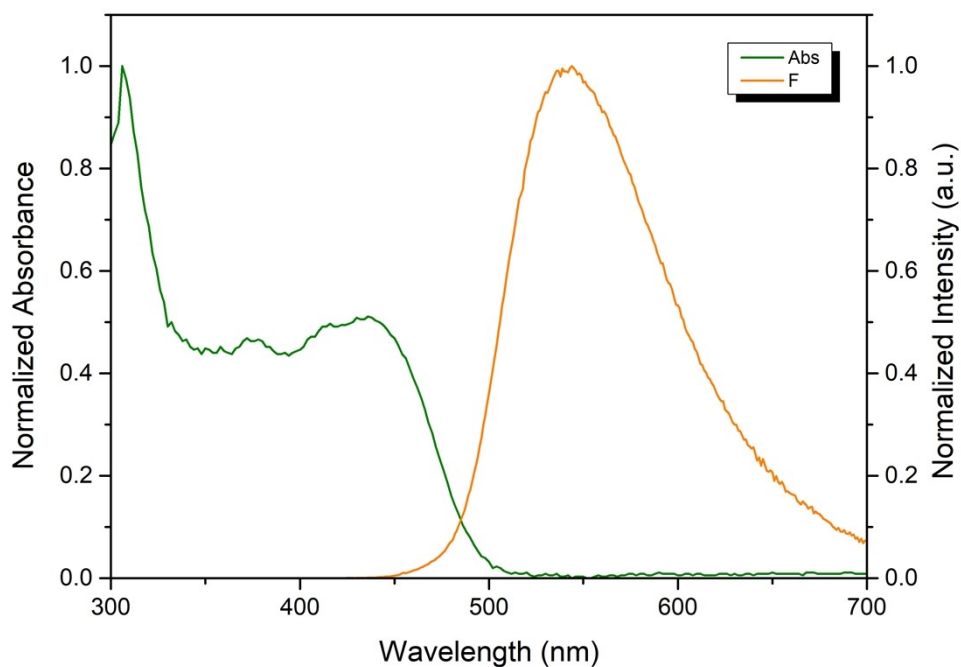

**Figure S6.** Normalized absorption (left) and emission (right) spectra of **3ag** recorded in DCM, excited at 450 nm, QY=13.3%.

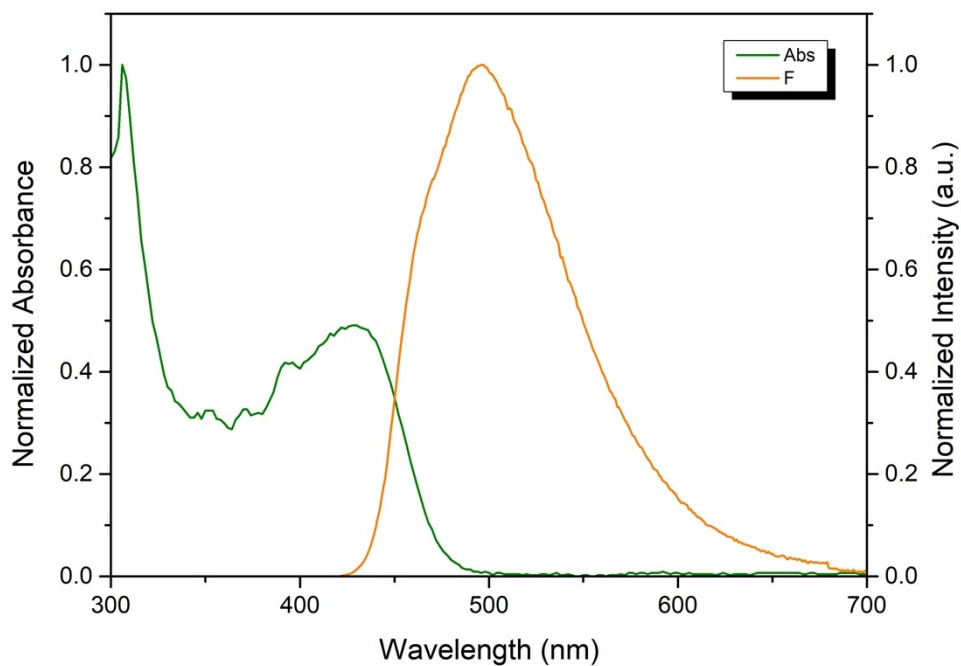

**Figure S7.** Normalized absorption (left) and emission (right) spectra of **3al** recorded in DCM, excited at 450 nm, QY=25.8%.

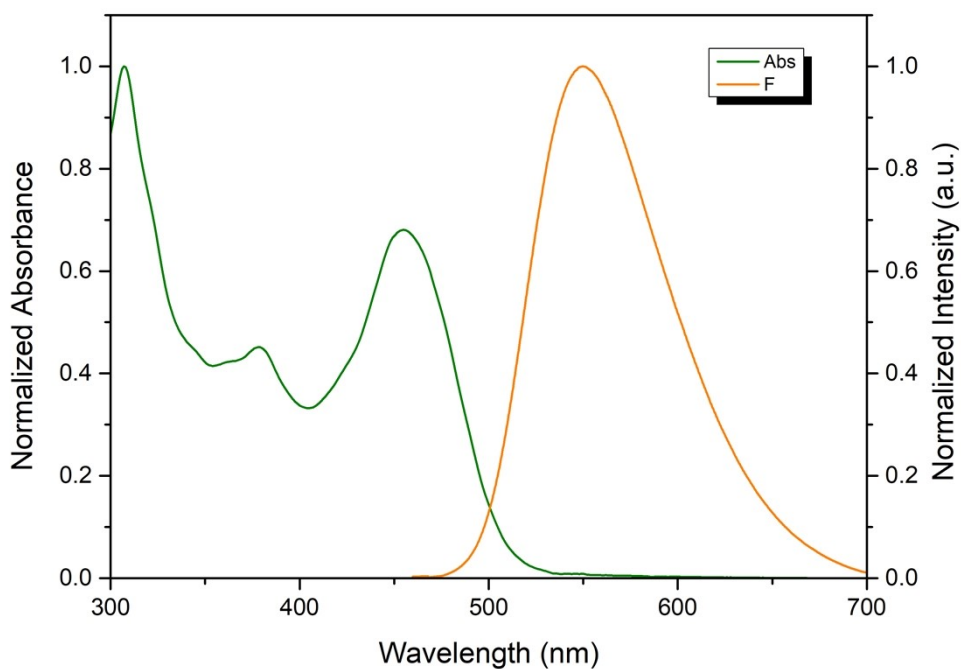

**Figure S8.** Normalized absorption (left) and emission (right) spectra of **3af** recorded in DCM, excited at 450 nm, QY=7.4%.

## 11. Copies of NMR spectroscopy

### <sup>1</sup>H NMR of **3aa** (400 MHz, CDCl<sub>3</sub>)

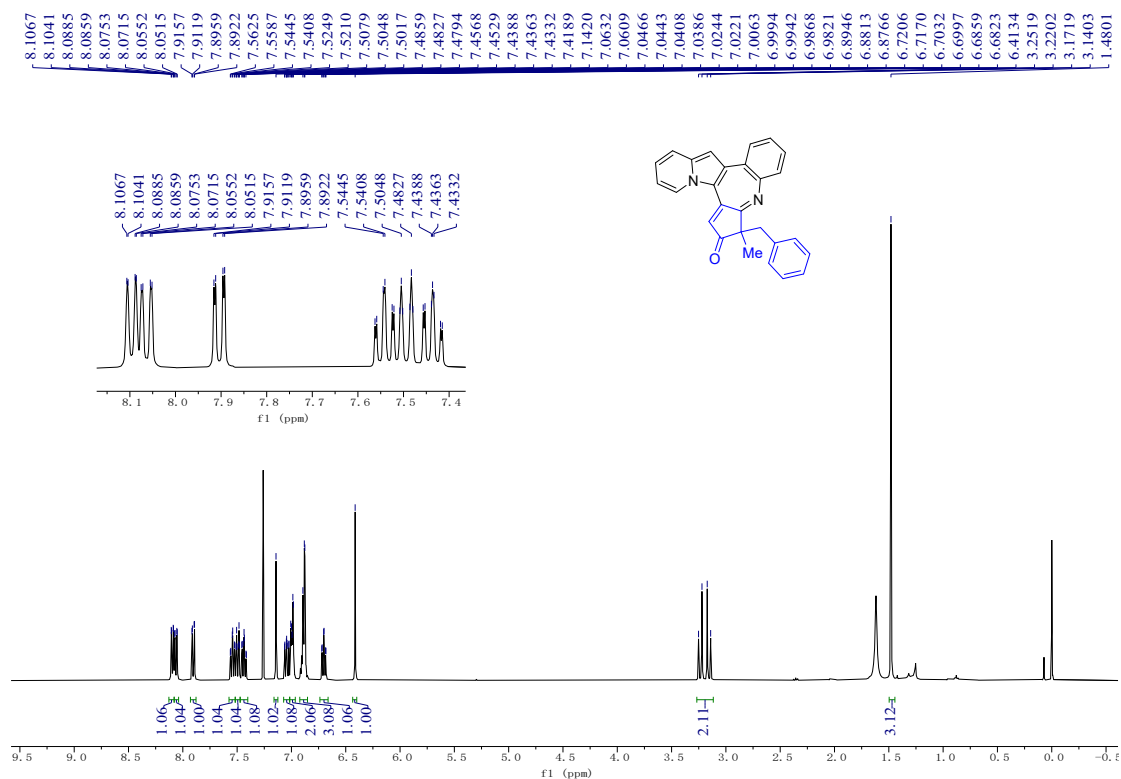

### <sup>13</sup>C NMR of **3aa** (101 MHz, CDCl<sub>3</sub>)

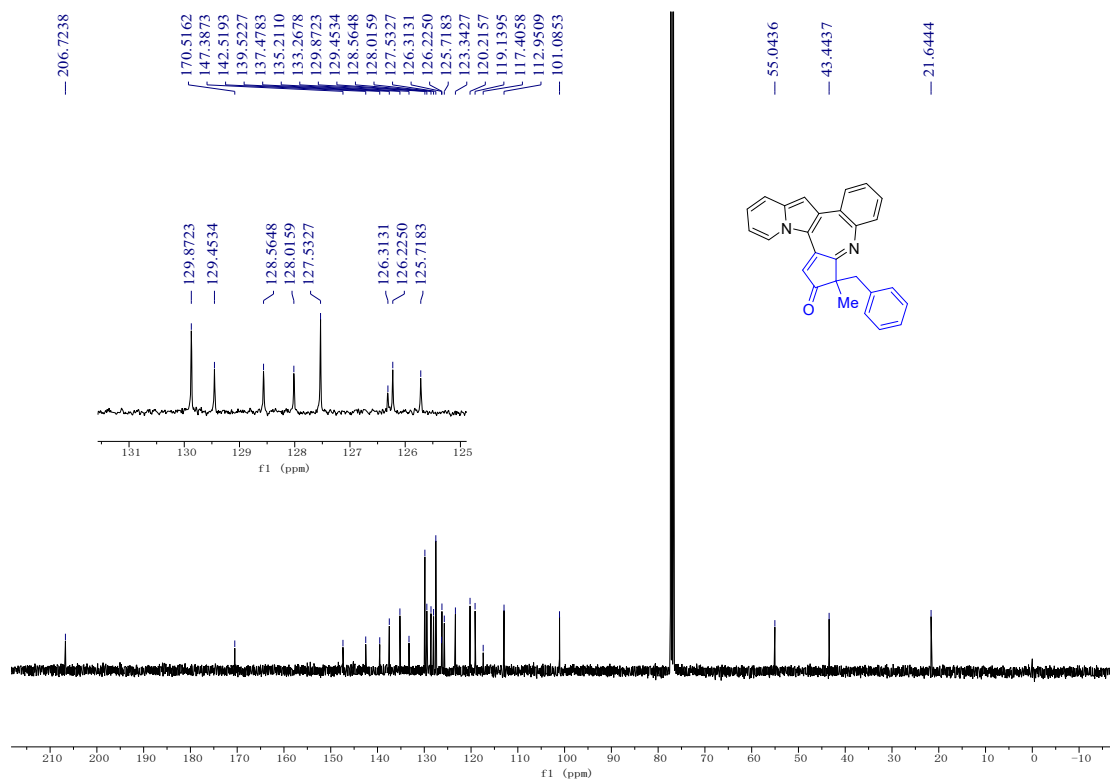

### $^1\text{H}$ NMR of **3ba** (400 MHz, $\text{CDCl}_3$ )

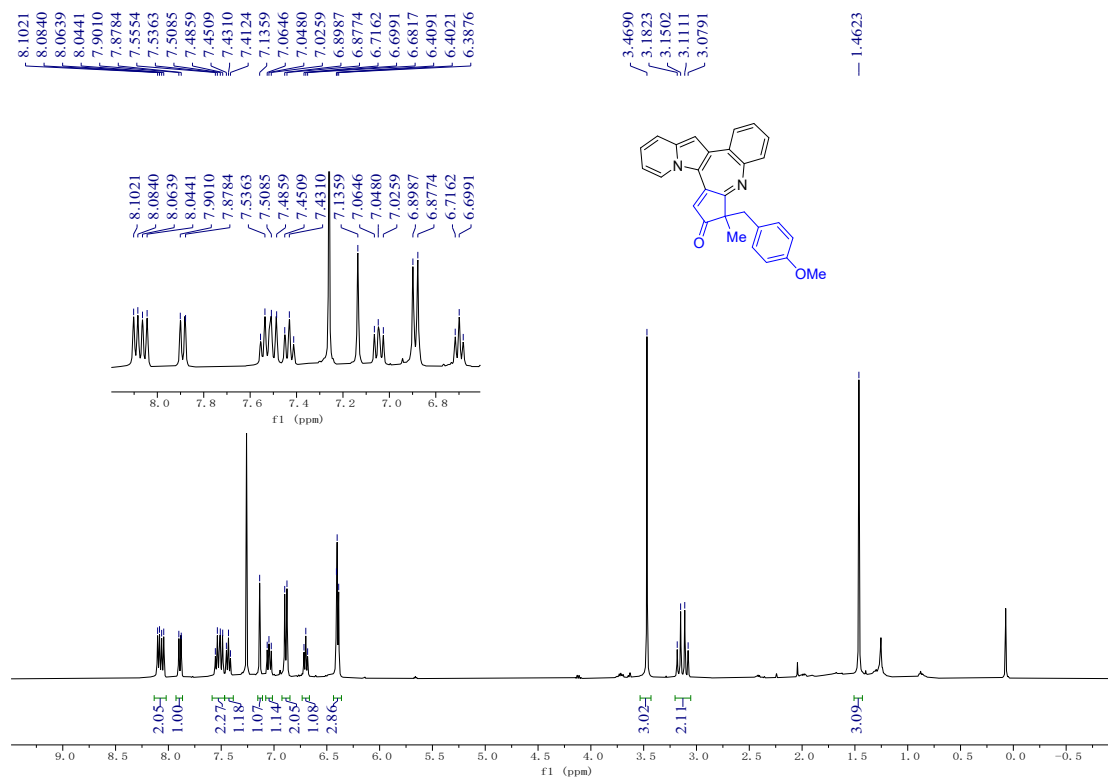

### $^{13}\text{C}$ NMR of **3ba** (101 MHz, $\text{CDCl}_3$ )

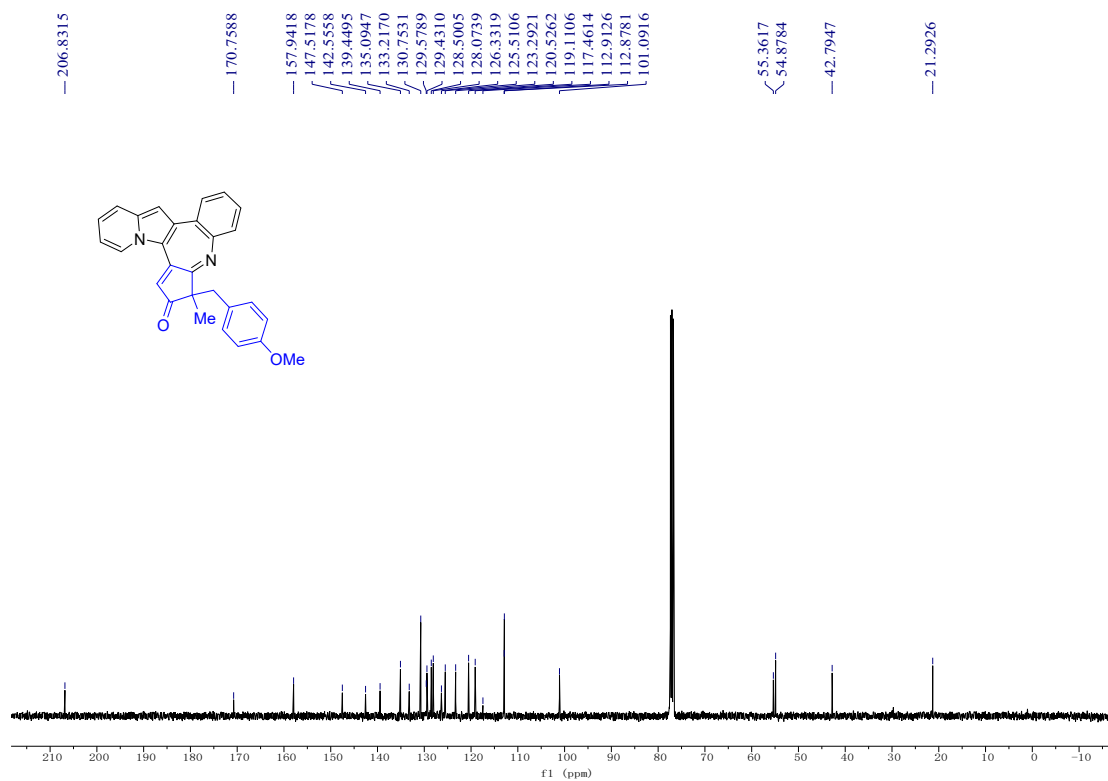

### <sup>1</sup>H NMR of **3ca** (400 MHz, CDCl<sub>3</sub>)

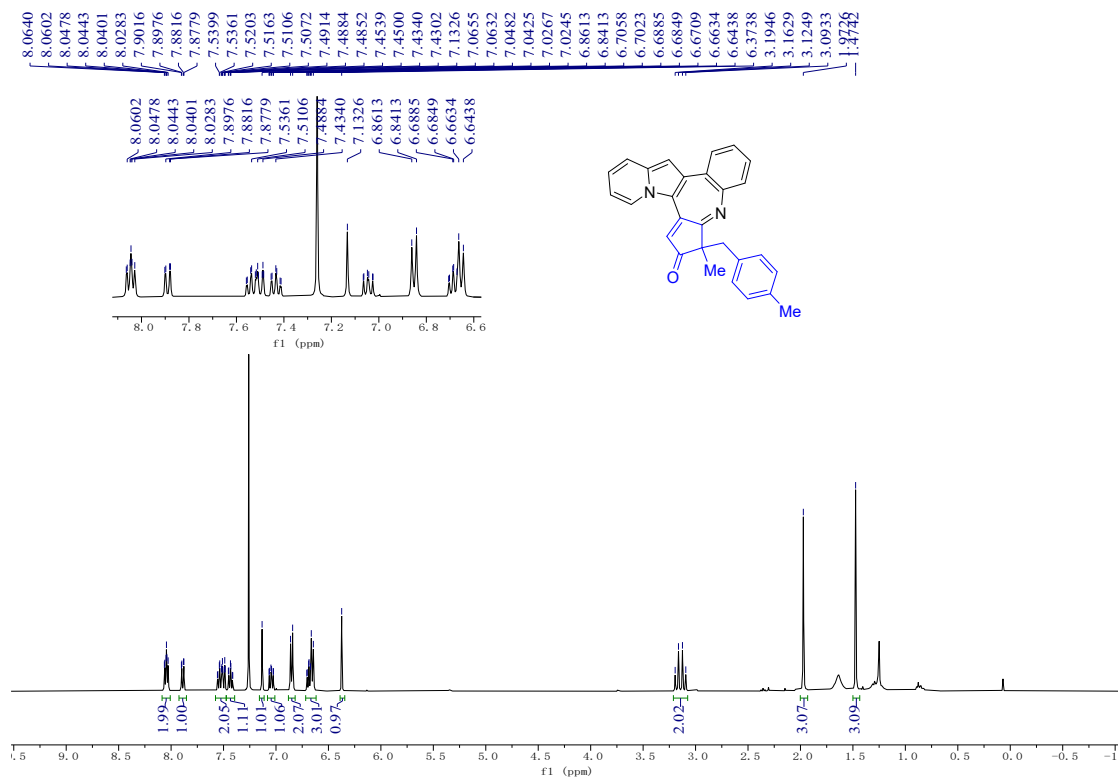

### <sup>13</sup>C NMR of **3ca** (101 MHz, CDCl<sub>3</sub>)

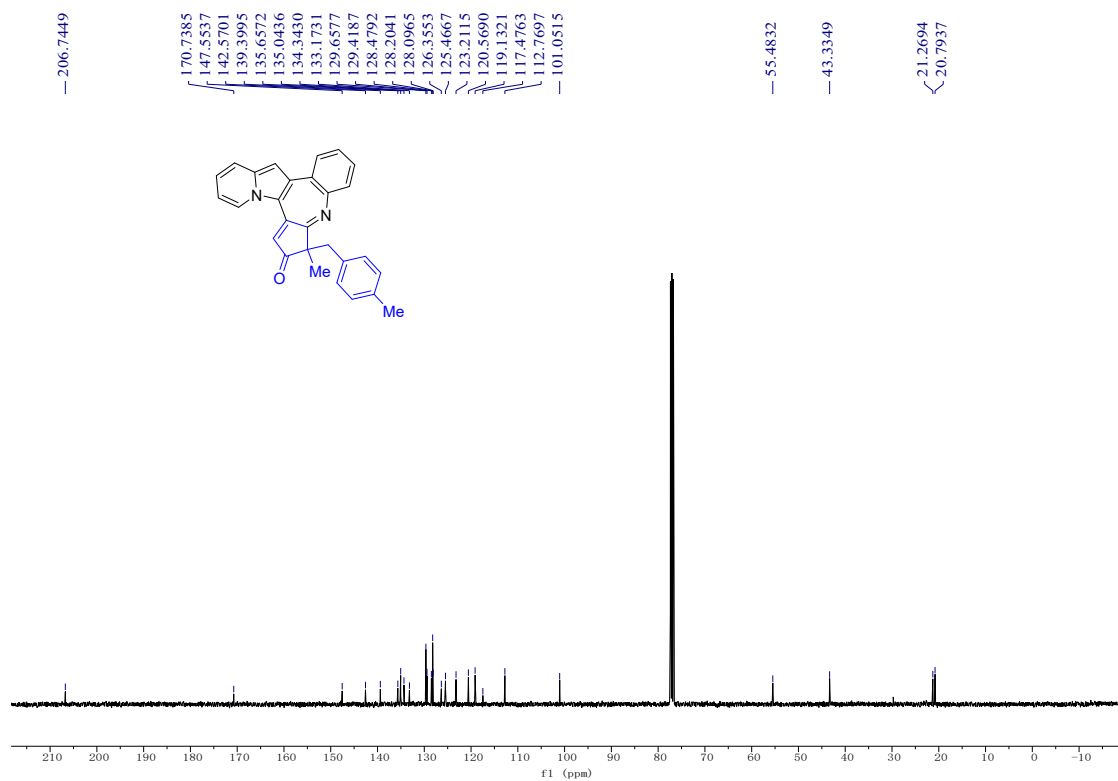

<sup>1</sup>H NMR of **3da** (500 MHz, CDCl<sub>3</sub>)

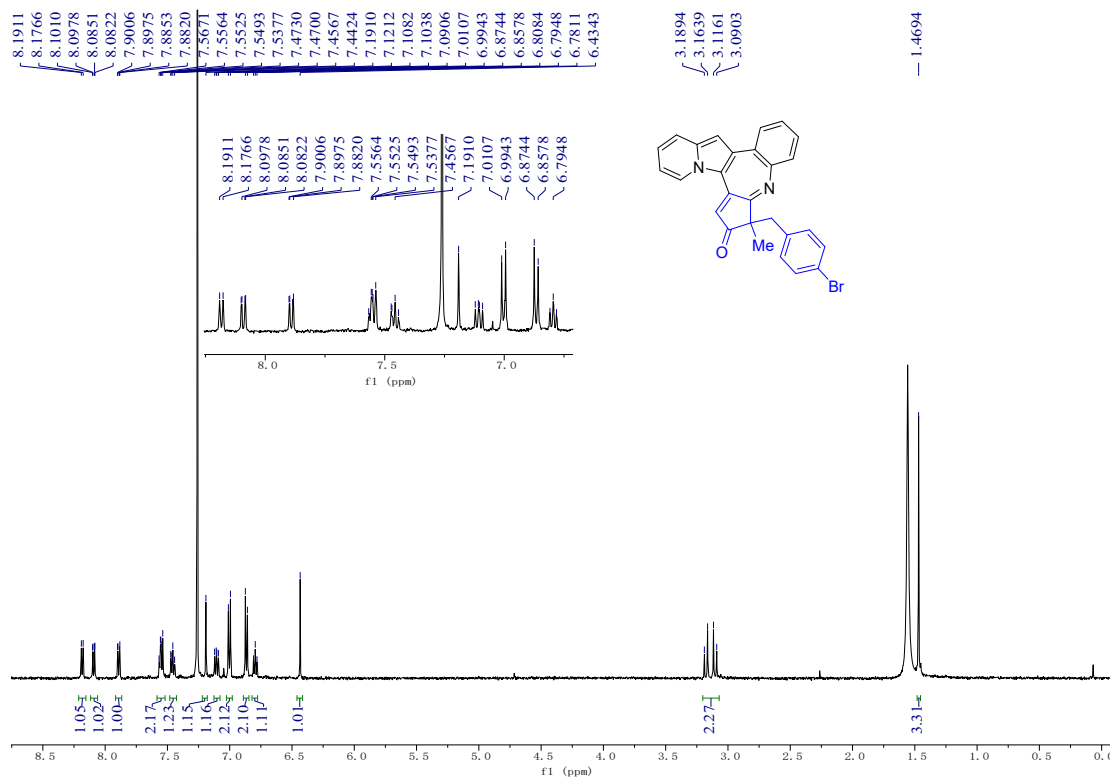

<sup>13</sup>C NMR of **3da** (125 MHz, CDCl<sub>3</sub>)

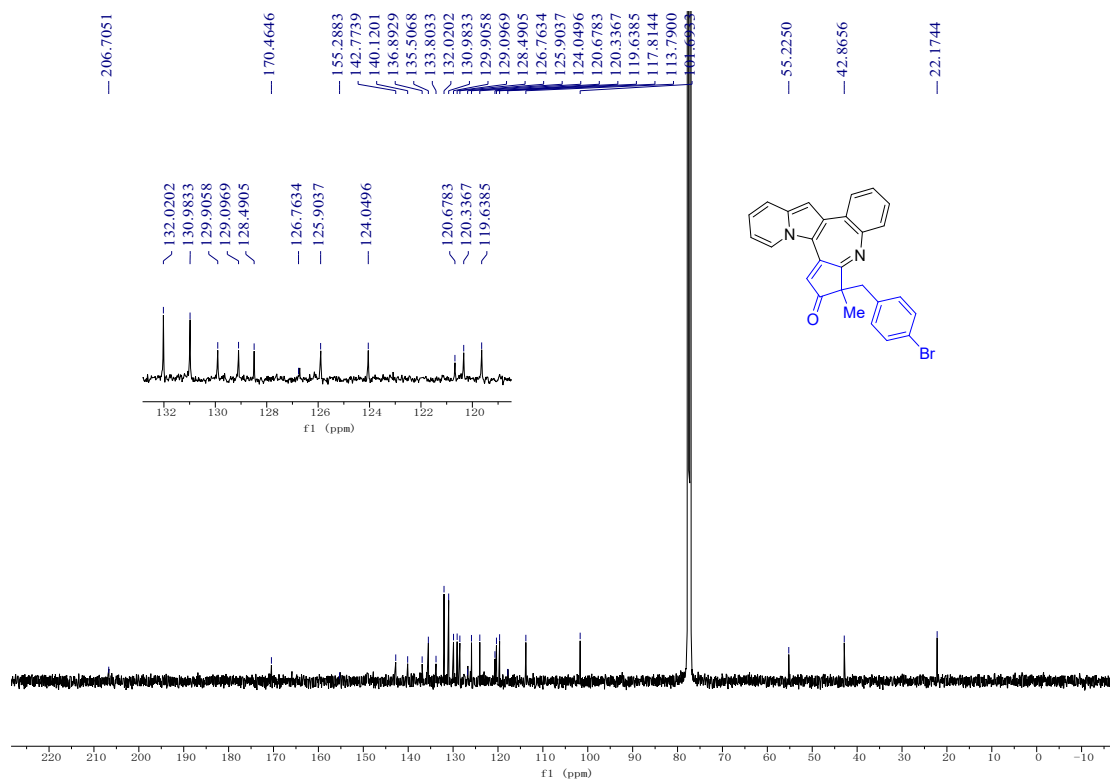

<sup>1</sup>H NMR of **3ea** (400 MHz, CDCl<sub>3</sub>)

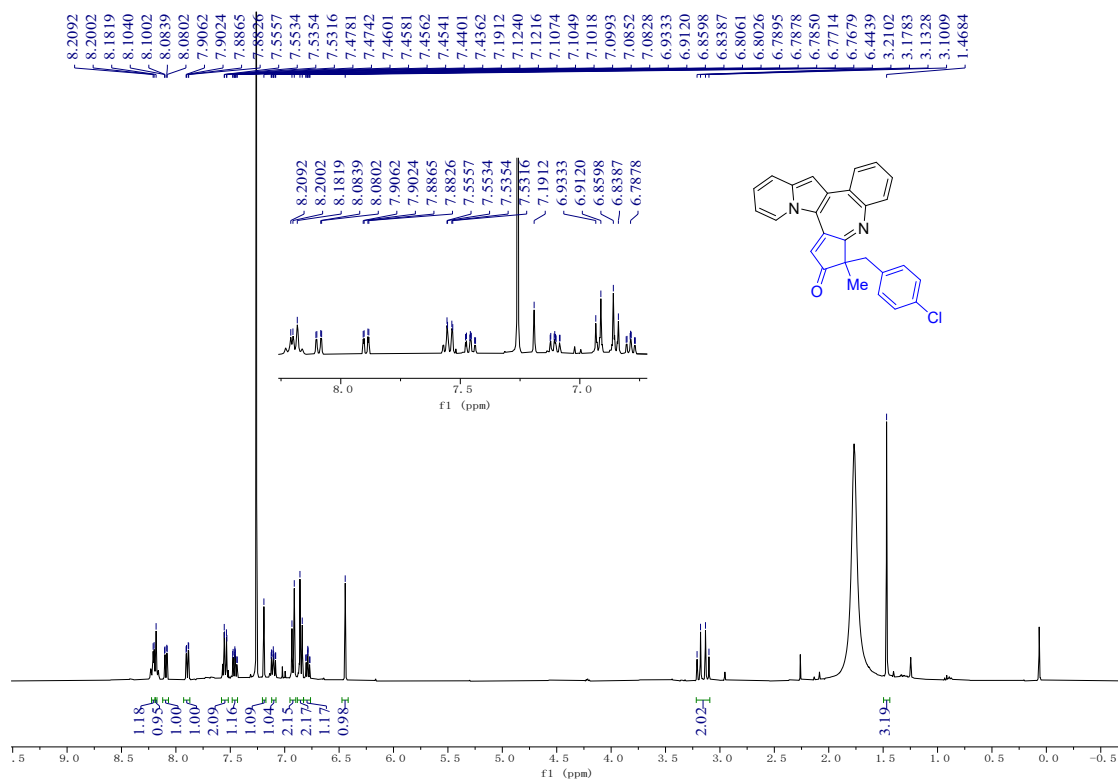

<sup>13</sup>C NMR of **3ea** (101 MHz, CDCl<sub>3</sub>)

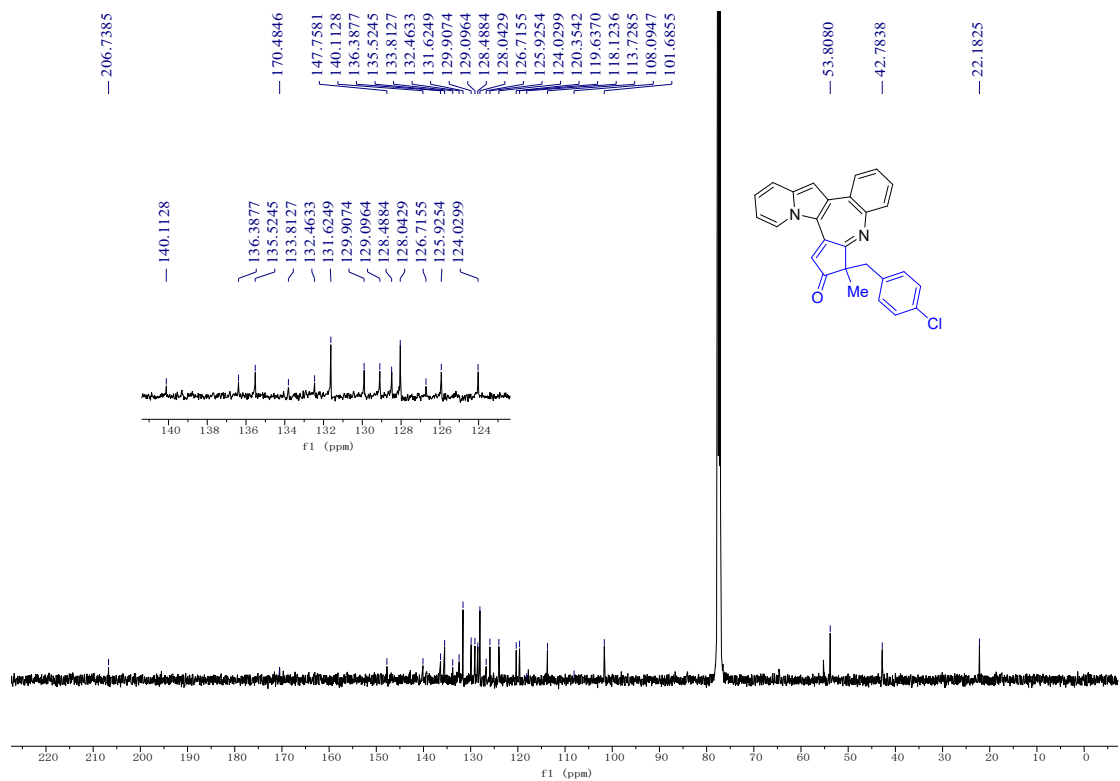

### $^1\text{H}$ NMR of **3fa** (400 MHz, $\text{CDCl}_3$ )

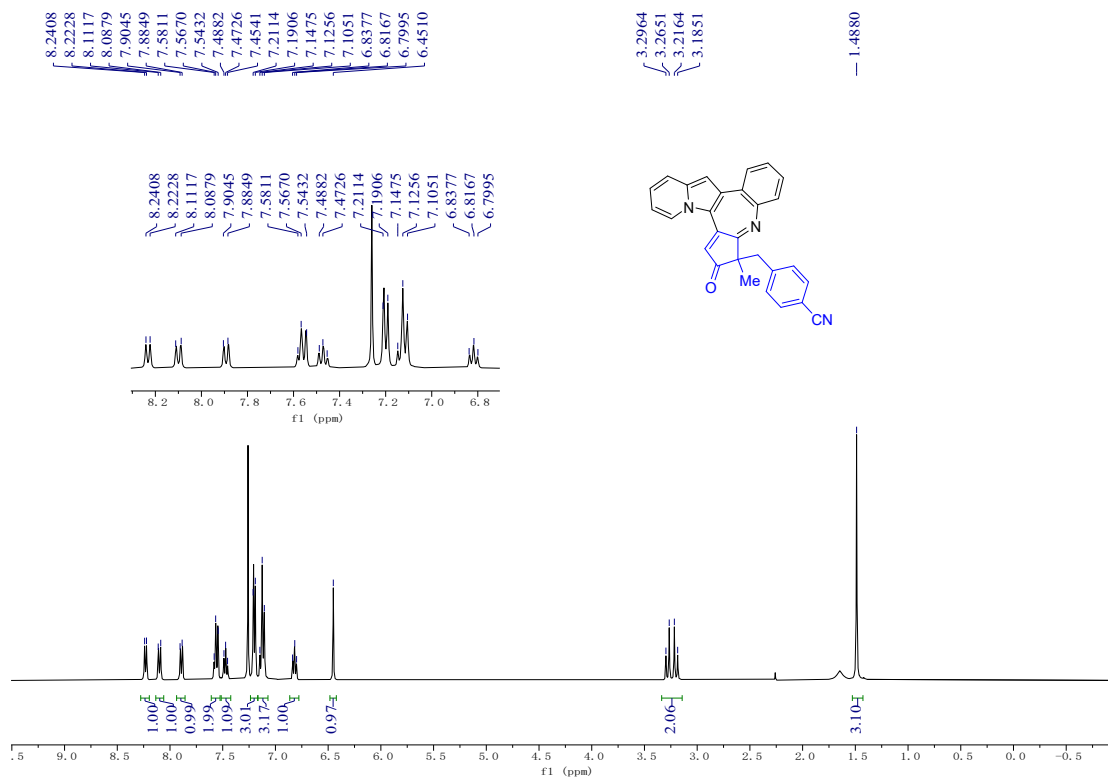

### $^{13}\text{C}$ NMR of **3fa** (101 MHz, $\text{CDCl}_3$ )

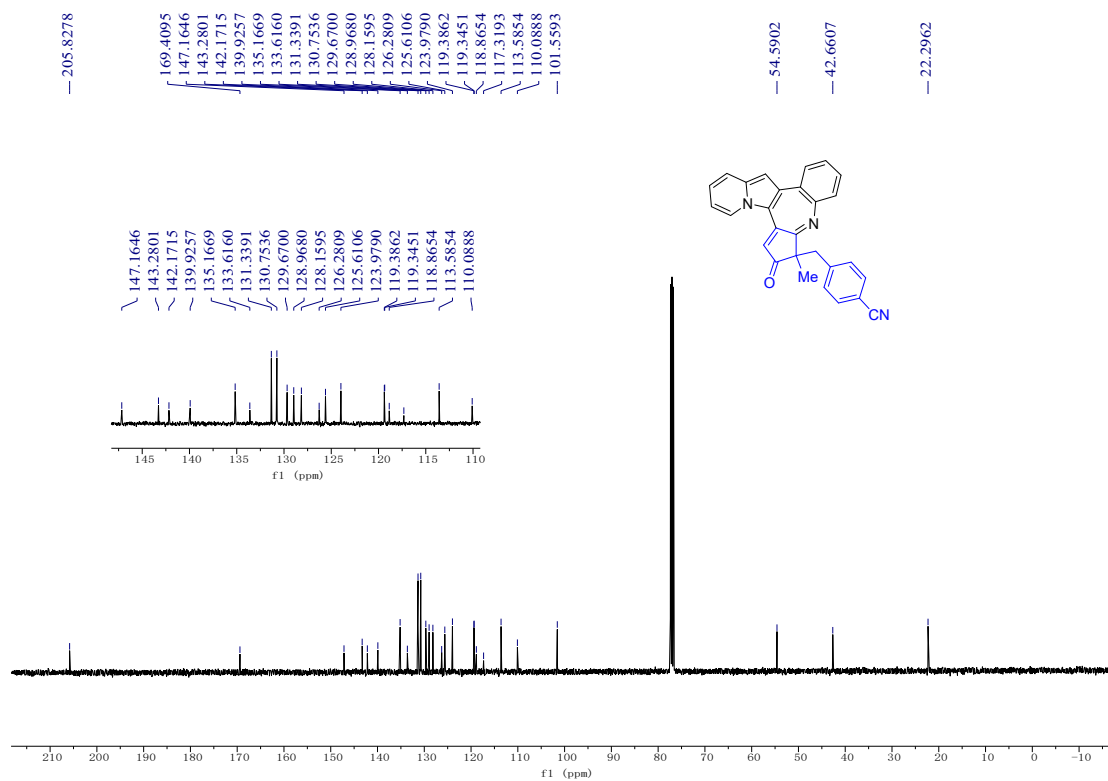



<sup>1</sup>H NMR of **3ga** (400 MHz, CDCl<sub>3</sub>)

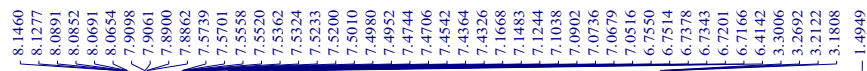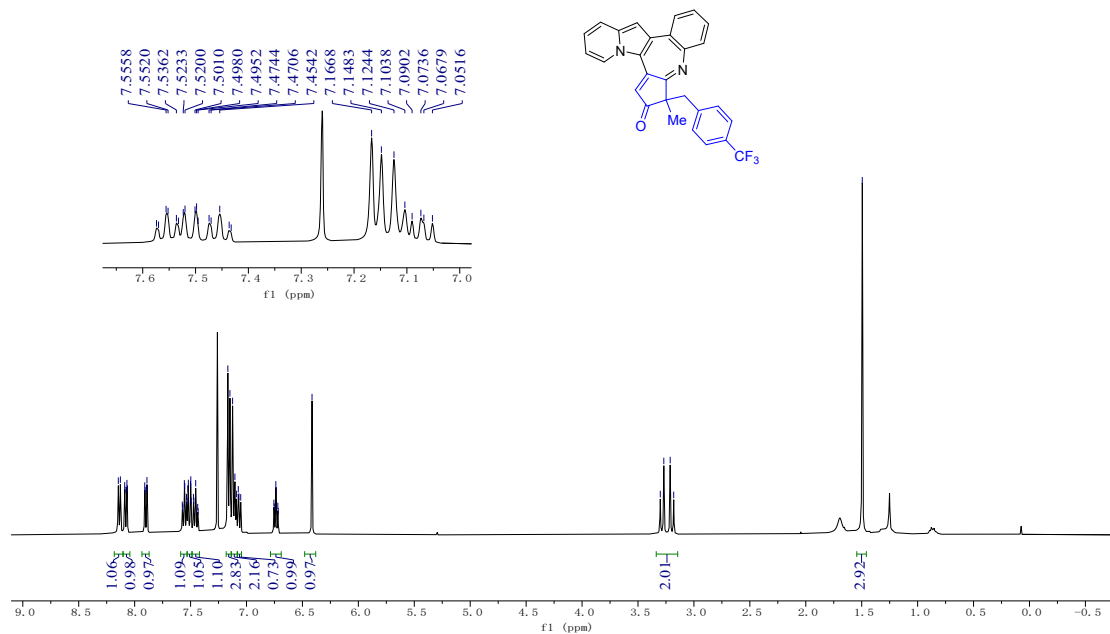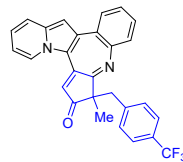

<sup>13</sup>C NMR of **3ga** (101 MHz, CDCl<sub>3</sub>)

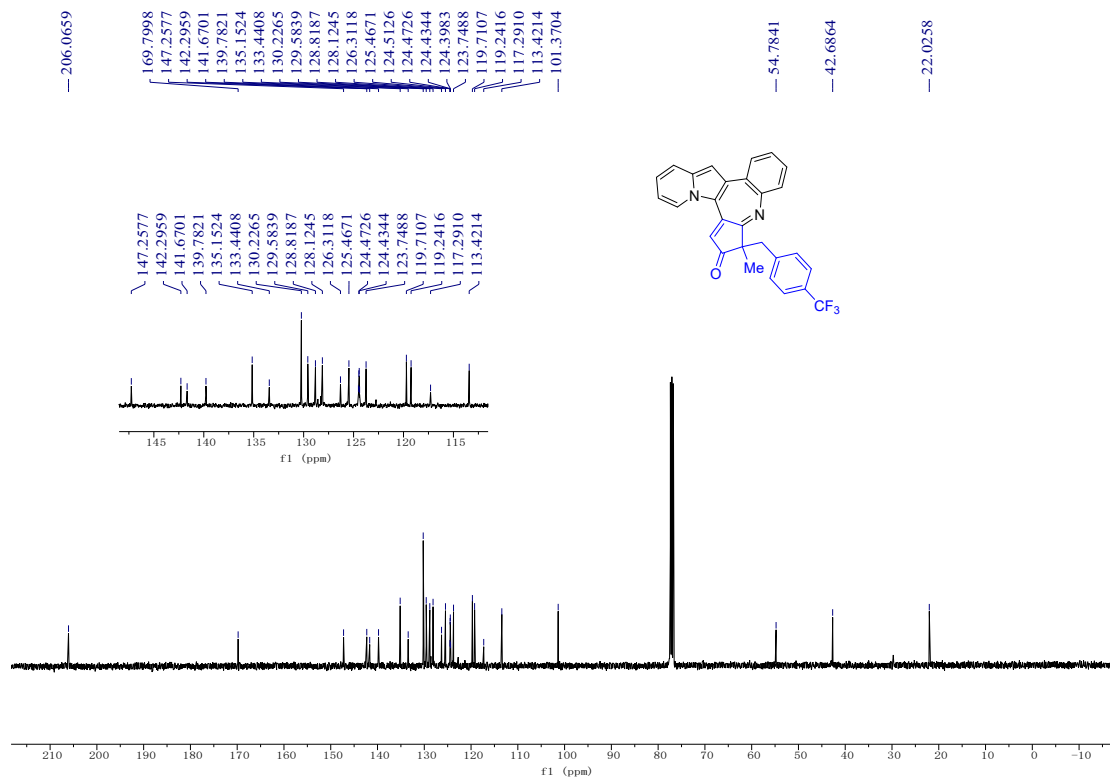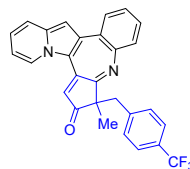

$^{19}\text{F}$  NMR of **3ga** (376 MHz,  $\text{CDCl}_3$ )

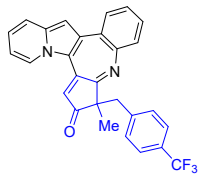

-61.9041

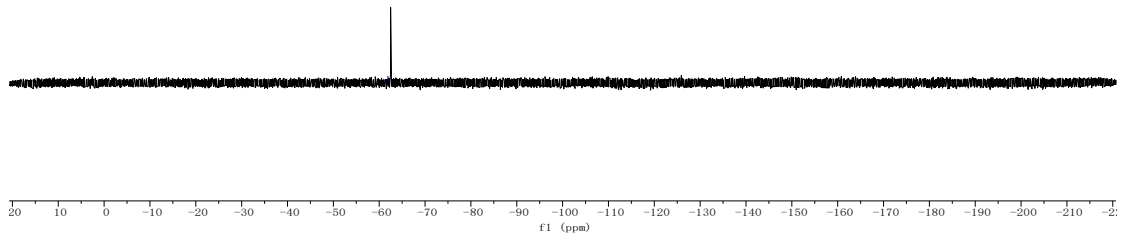

<sup>1</sup>H NMR of **3ha** (500 MHz, CDCl<sub>3</sub>)

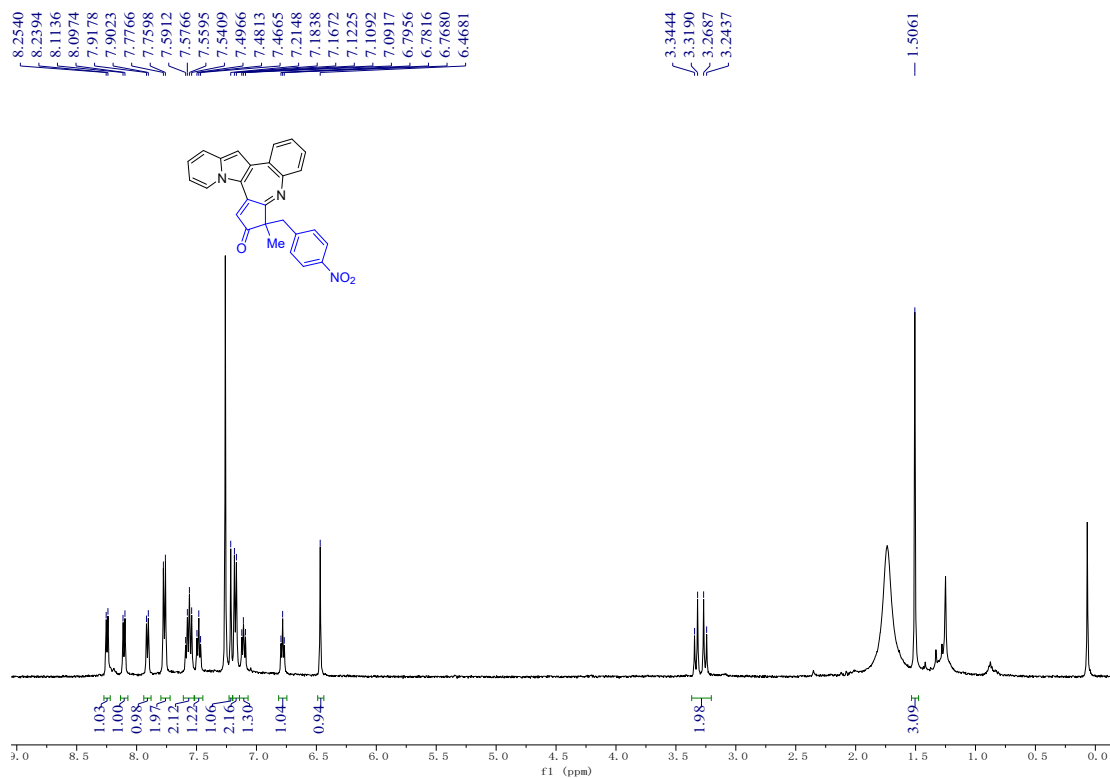

<sup>13</sup>C NMR of **3ha** (125 MHz, CDCl<sub>3</sub>)

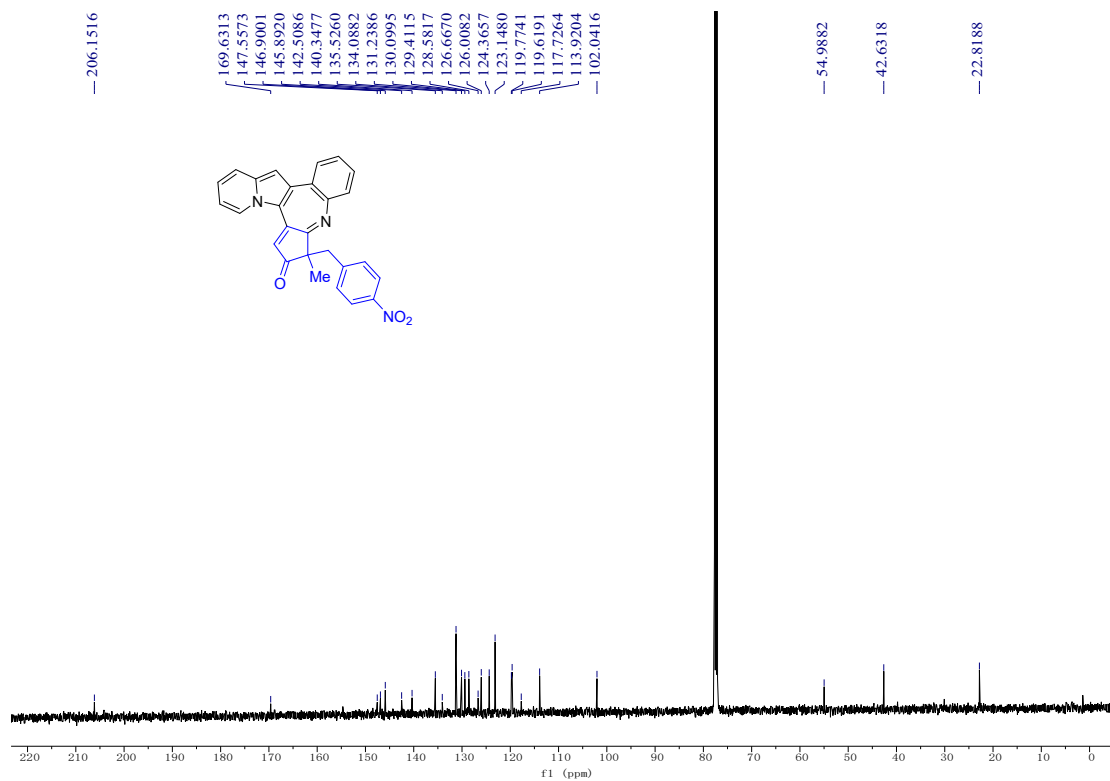

**<sup>1</sup>H NMR of 3ia (400 MHz, CDCl<sub>3</sub>)**

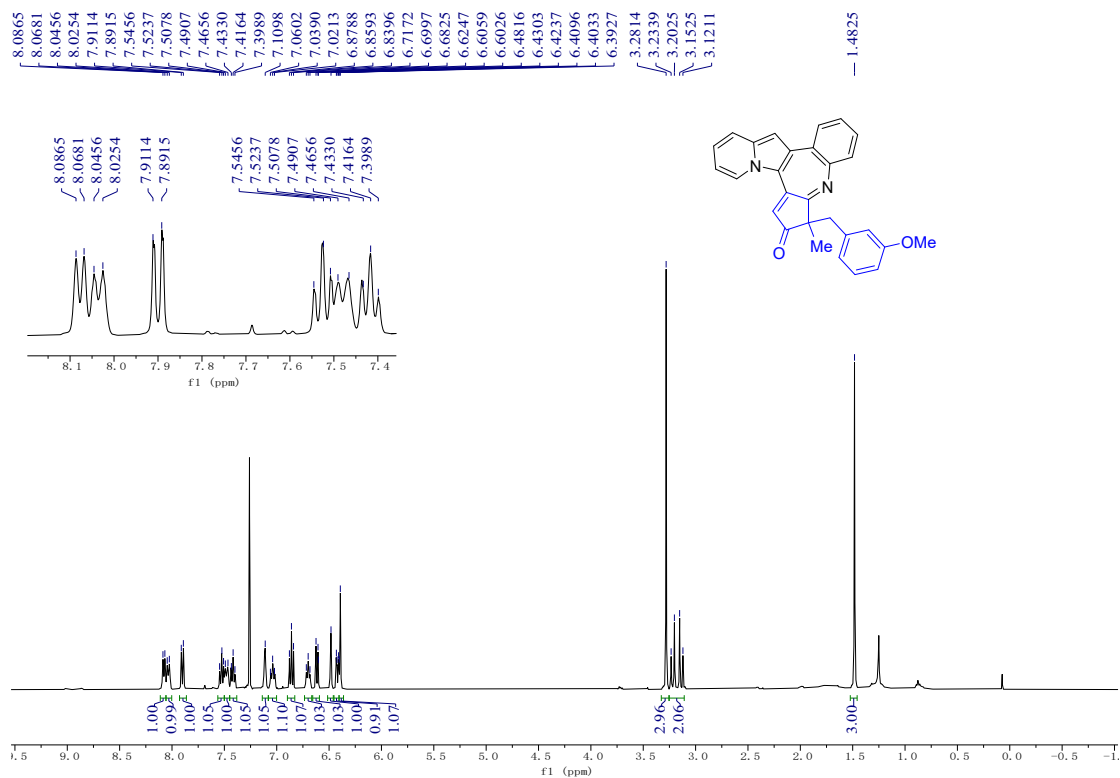

**<sup>13</sup>C NMR of 3ia (101 MHz, CDCl<sub>3</sub>)**

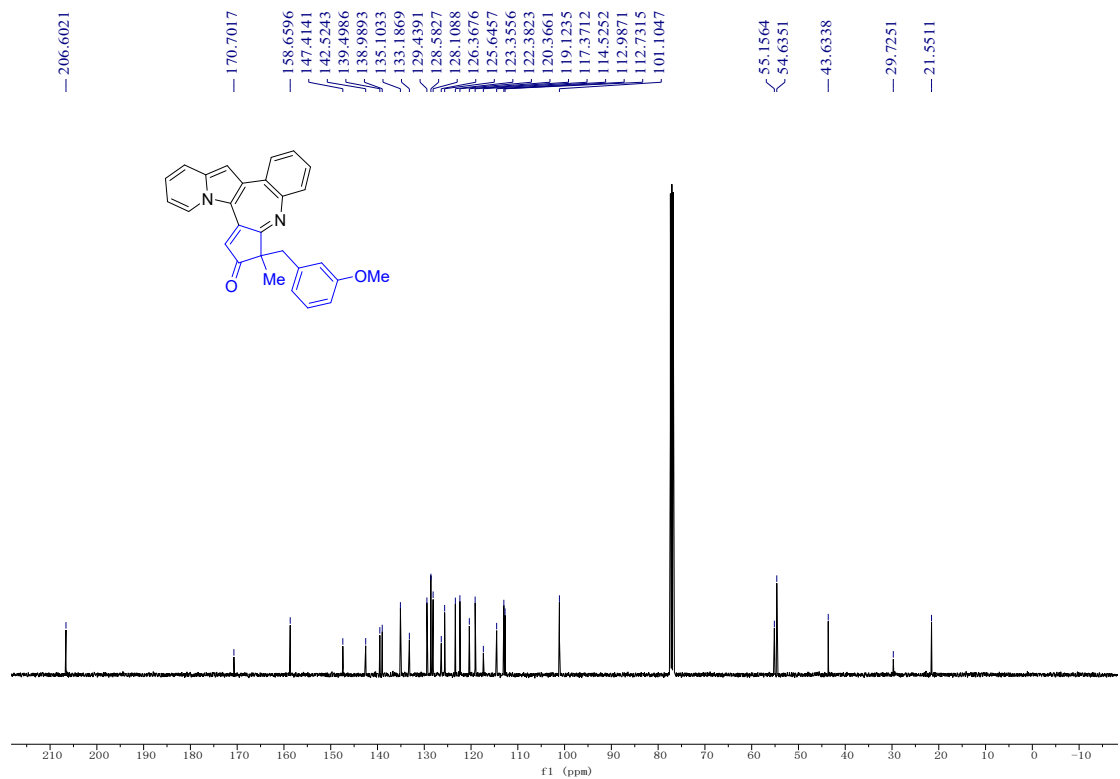

### <sup>1</sup>H NMR of **3ja** (400 MHz, CDCl<sub>3</sub>)

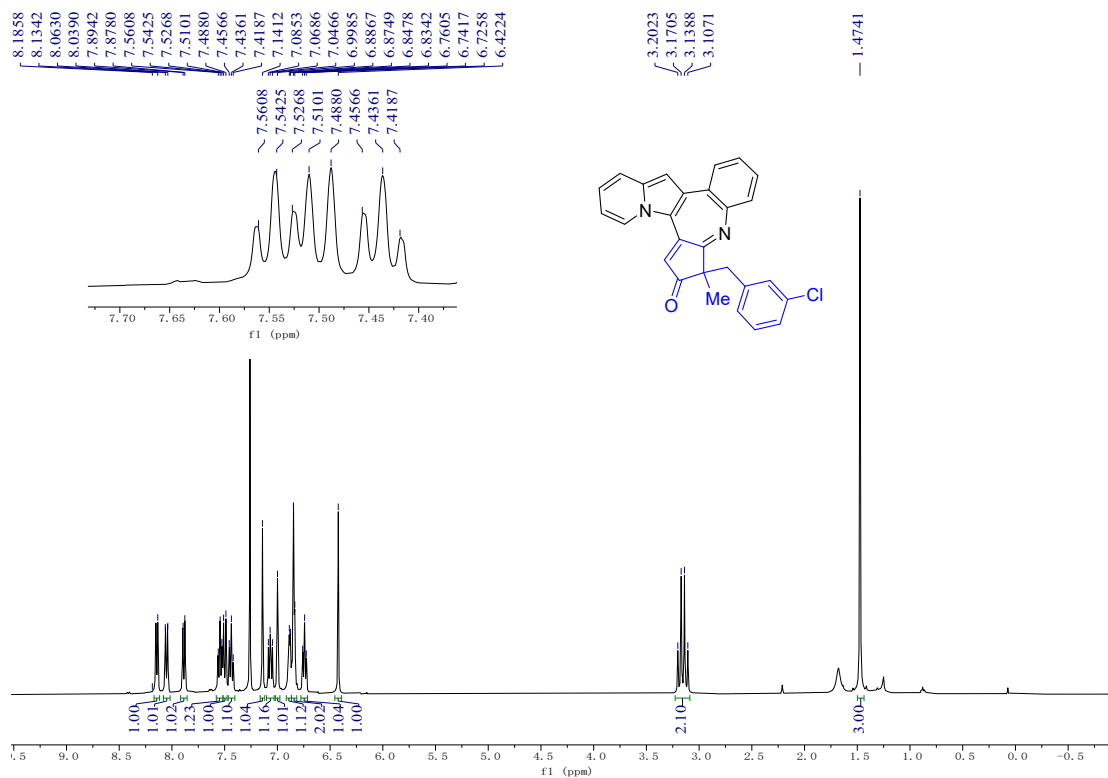

### <sup>13</sup>C NMR of **3ja** (101 MHz, CDCl<sub>3</sub>)

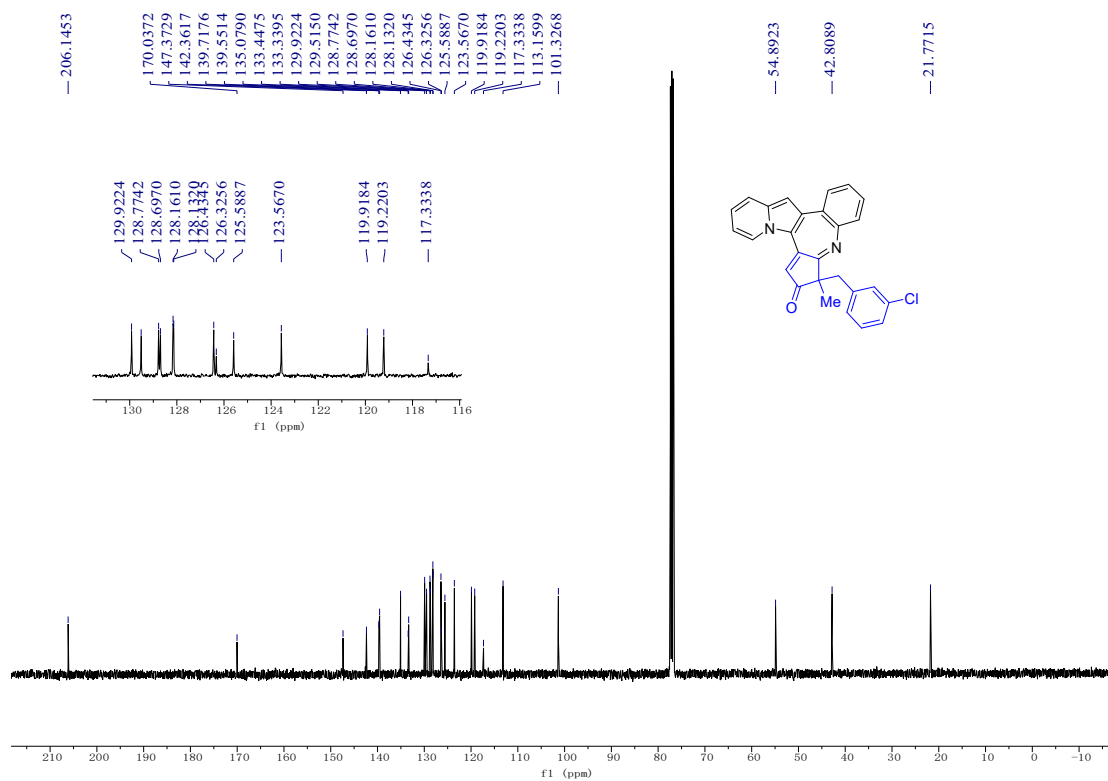

<sup>1</sup>H NMR of **3ka** (400 MHz, CDCl<sub>3</sub>)

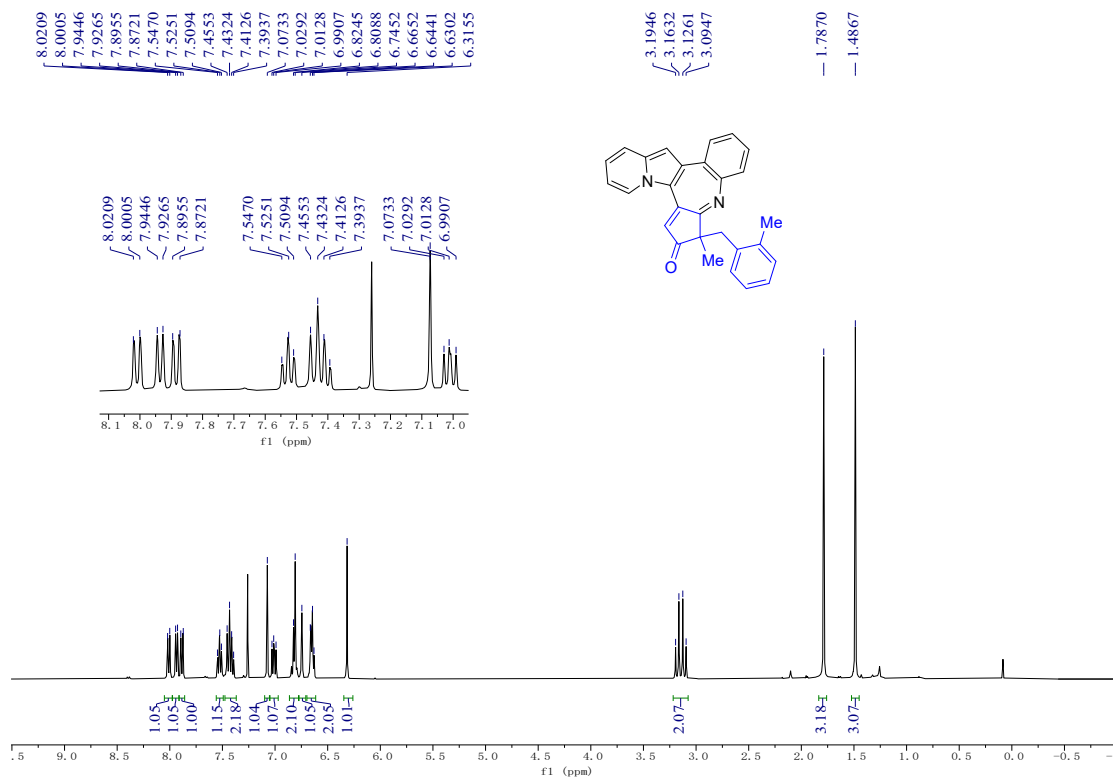

<sup>13</sup>C NMR of **3ka** (101 MHz, CDCl<sub>3</sub>)

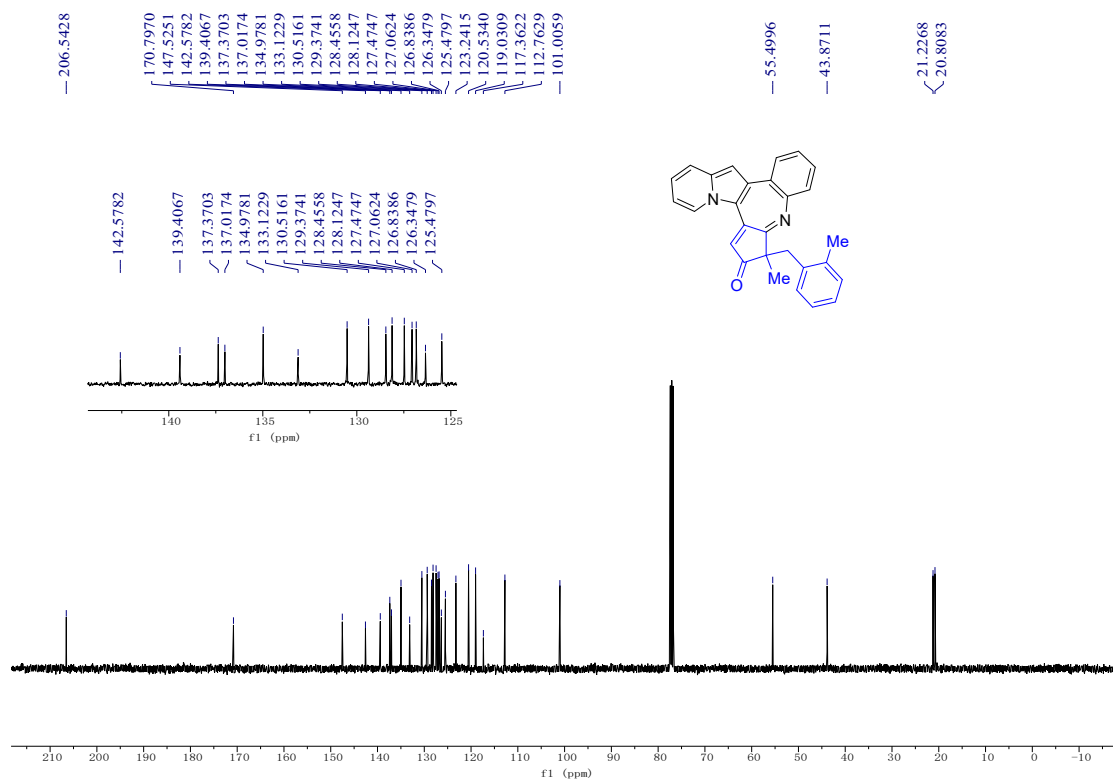

<sup>1</sup>H NMR of **3la** (400 MHz, CDCl<sub>3</sub>)

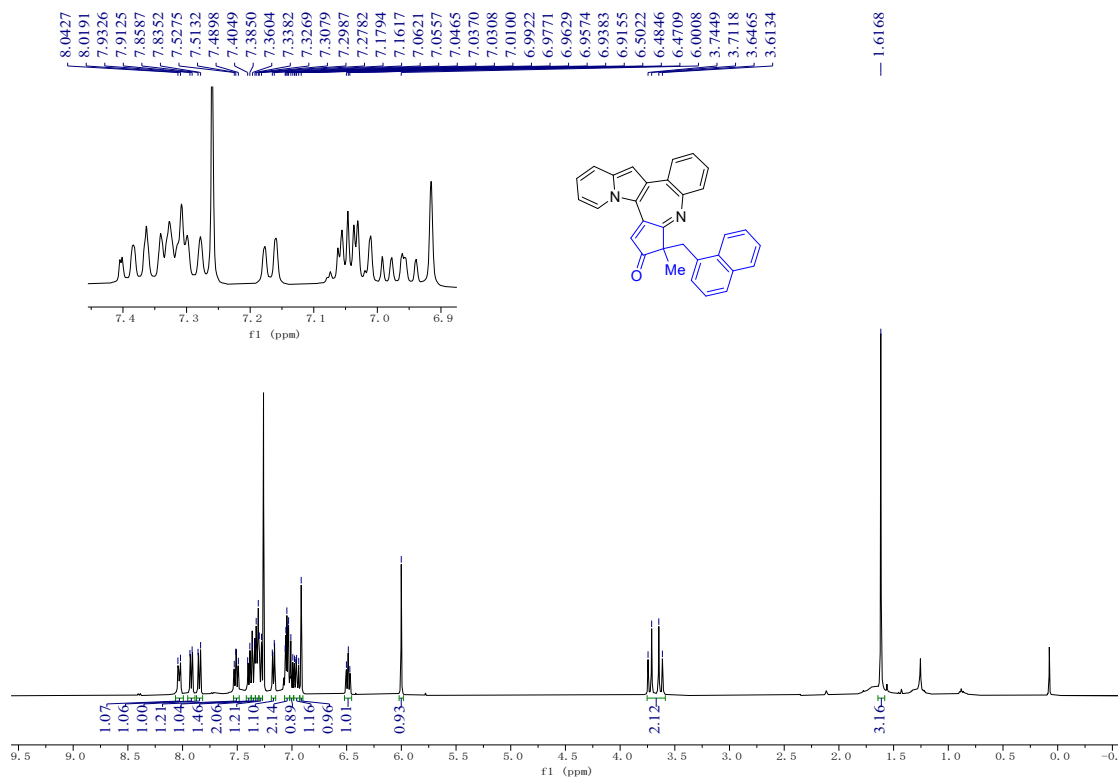

<sup>13</sup>C NMR of **3la** (101 MHz, CDCl<sub>3</sub>)

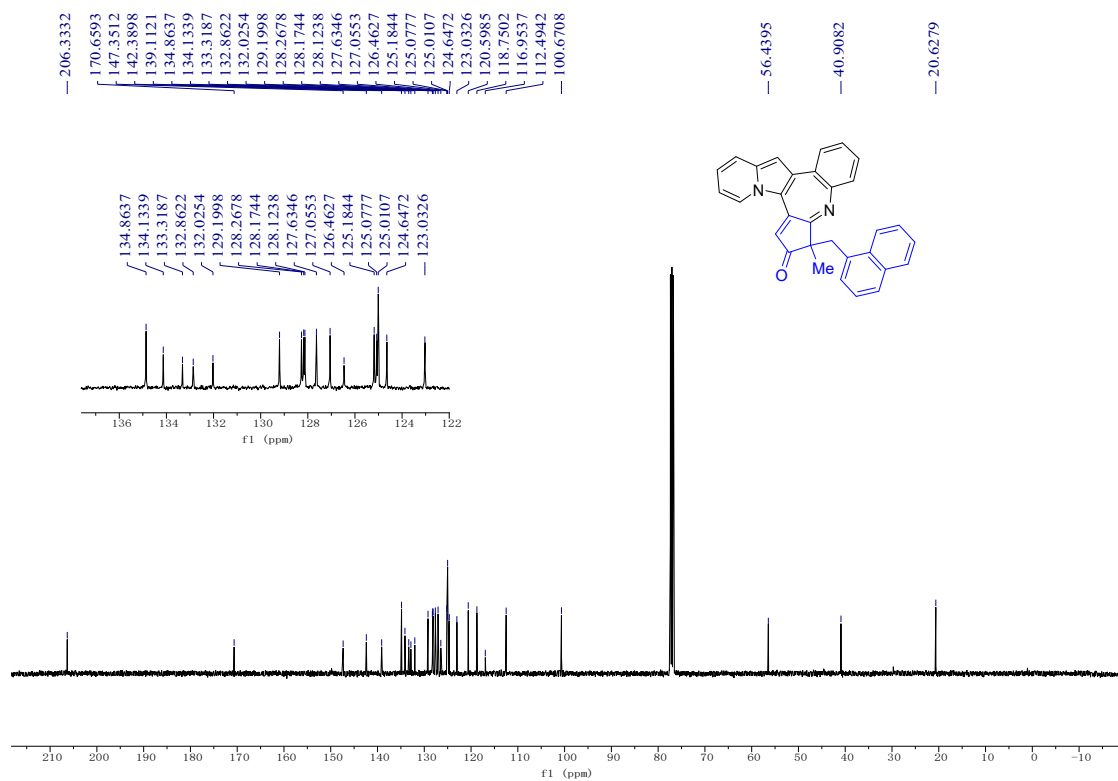

### <sup>1</sup>H NMR of **3ma** (400 MHz, CDCl<sub>3</sub>)

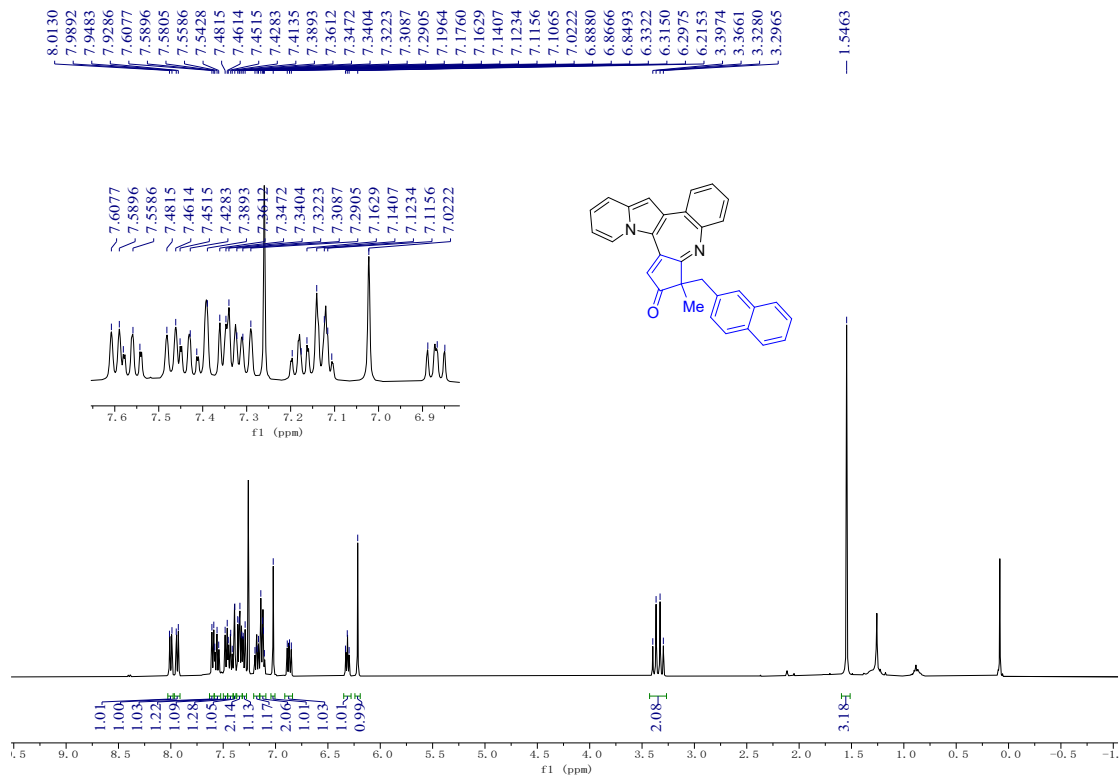

### <sup>13</sup>C NMR of **3ma** (101 MHz, CDCl<sub>3</sub>)

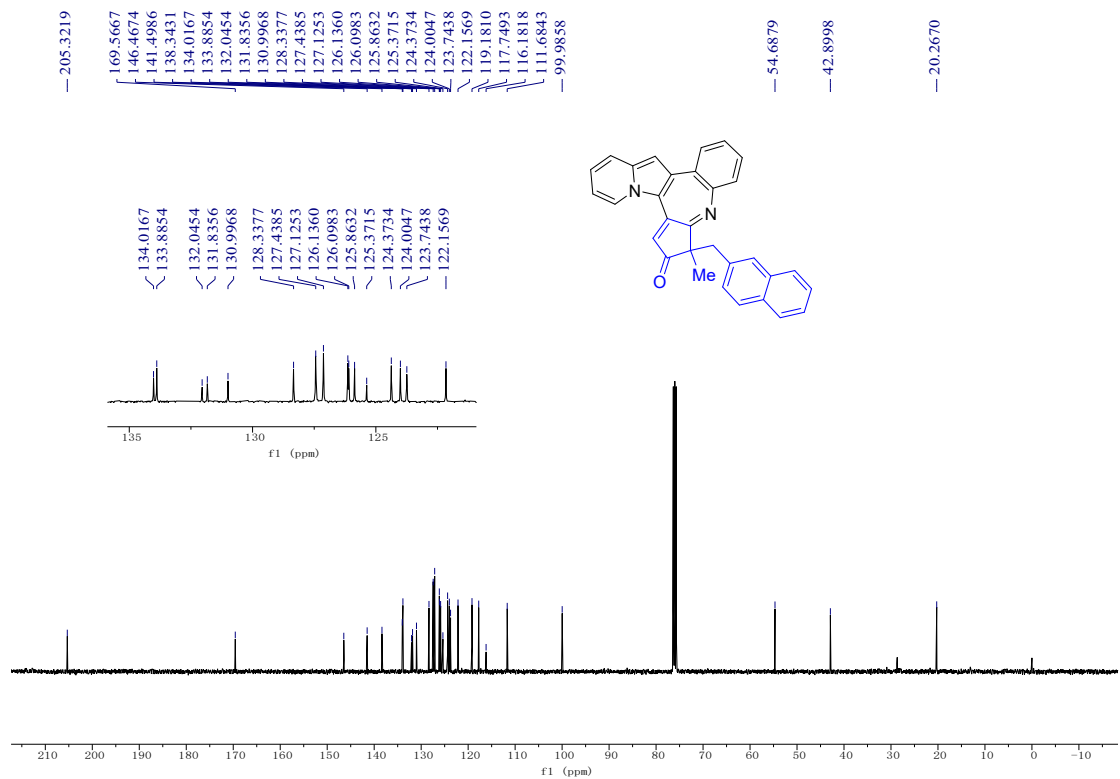



### <sup>1</sup>H NMR of **3na** (400 MHz, CDCl<sub>3</sub>)

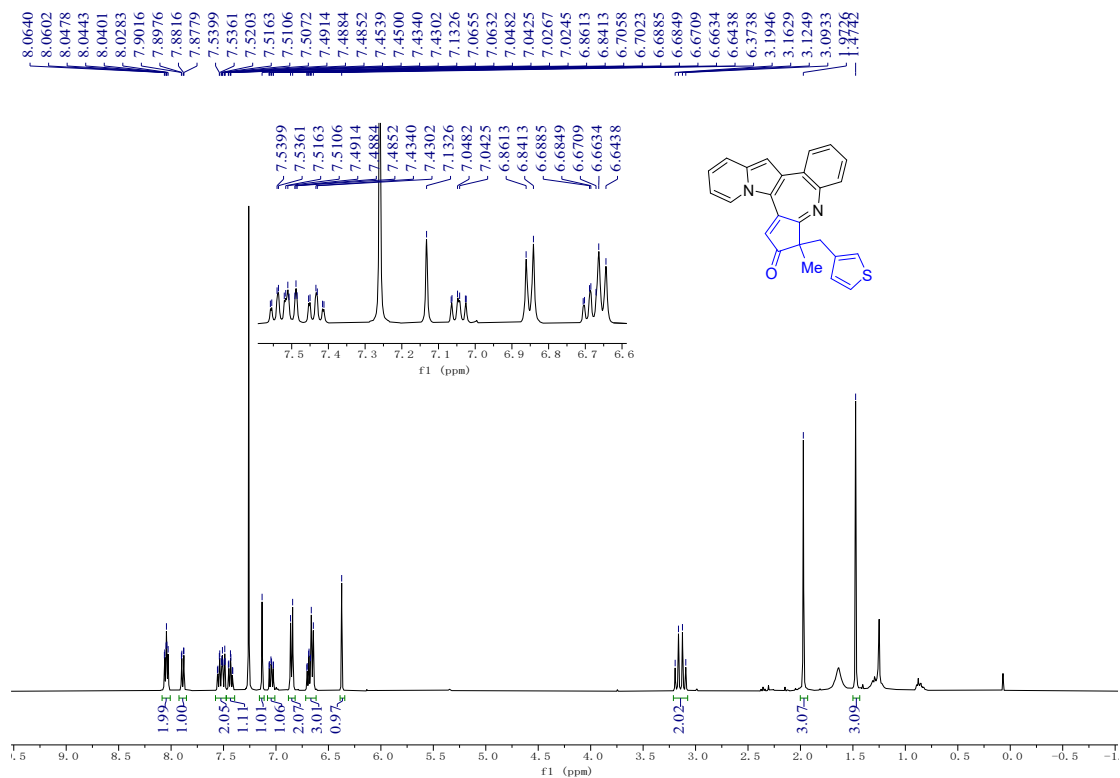

### <sup>13</sup>C NMR of **3na** (101 MHz, CDCl<sub>3</sub>)

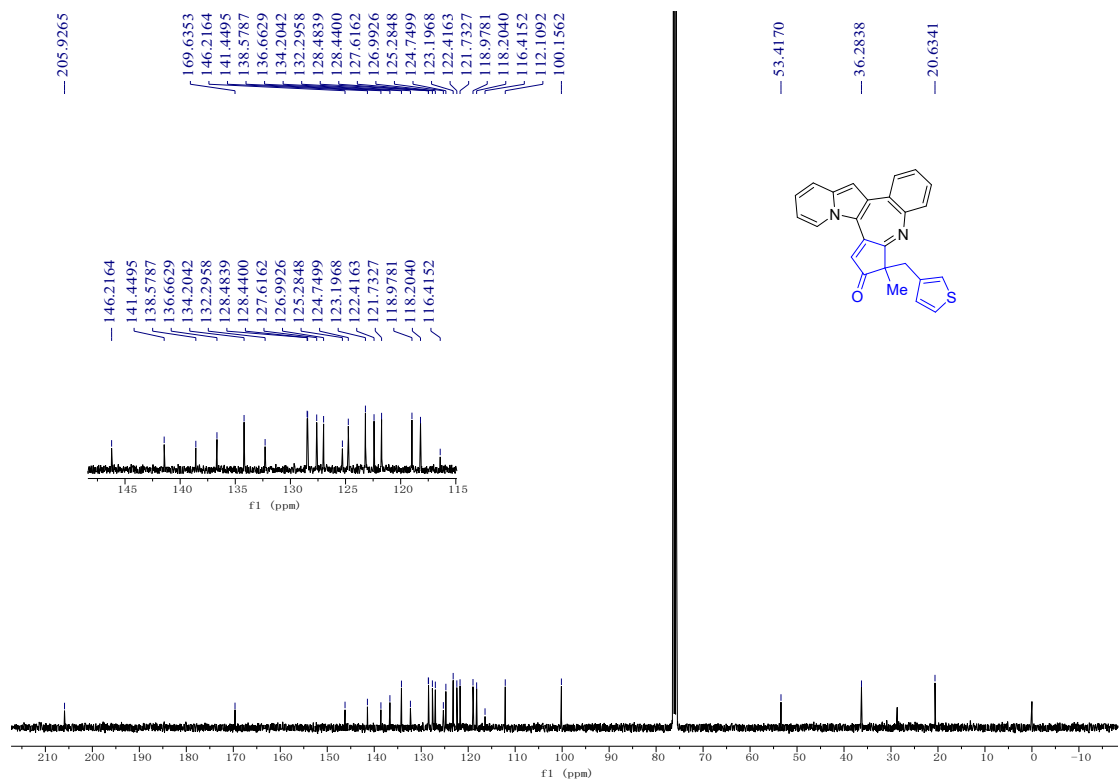

<sup>1</sup>H NMR of **30a** (400 MHz, CDCl<sub>3</sub>)

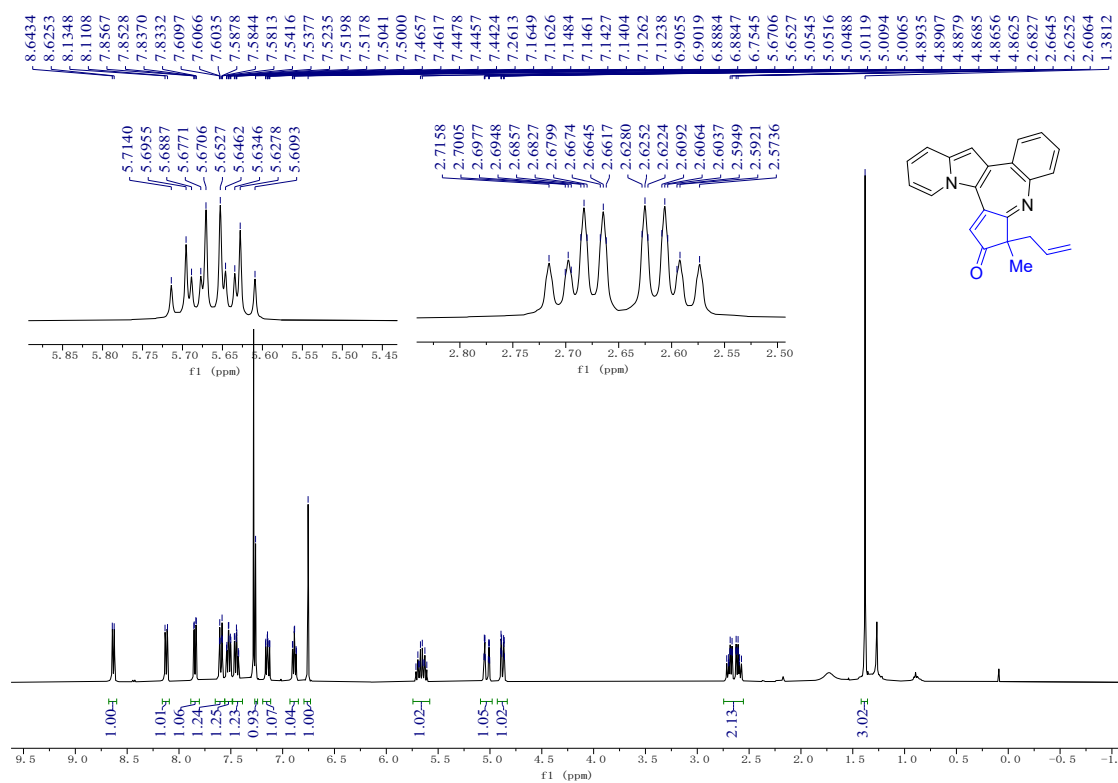

<sup>13</sup>C NMR of **30a** (101 MHz, CDCl<sub>3</sub>)

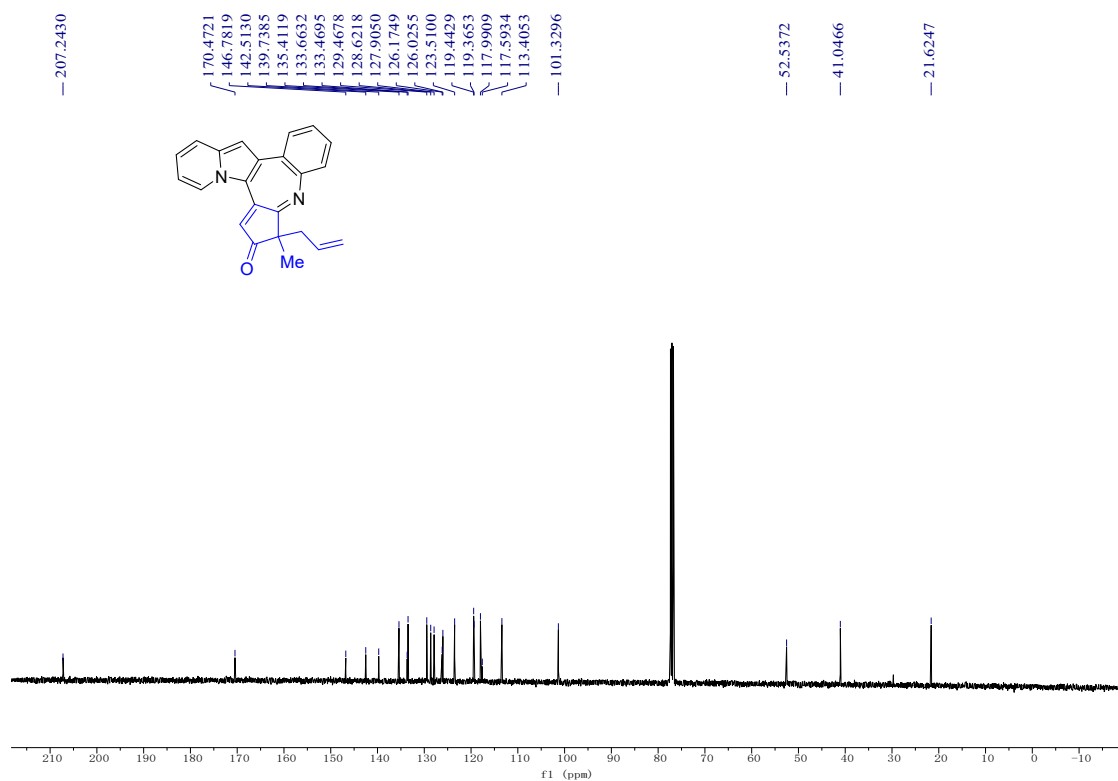

### $^1\text{H}$ NMR of **3pa** (400 MHz, $\text{CDCl}_3$ )

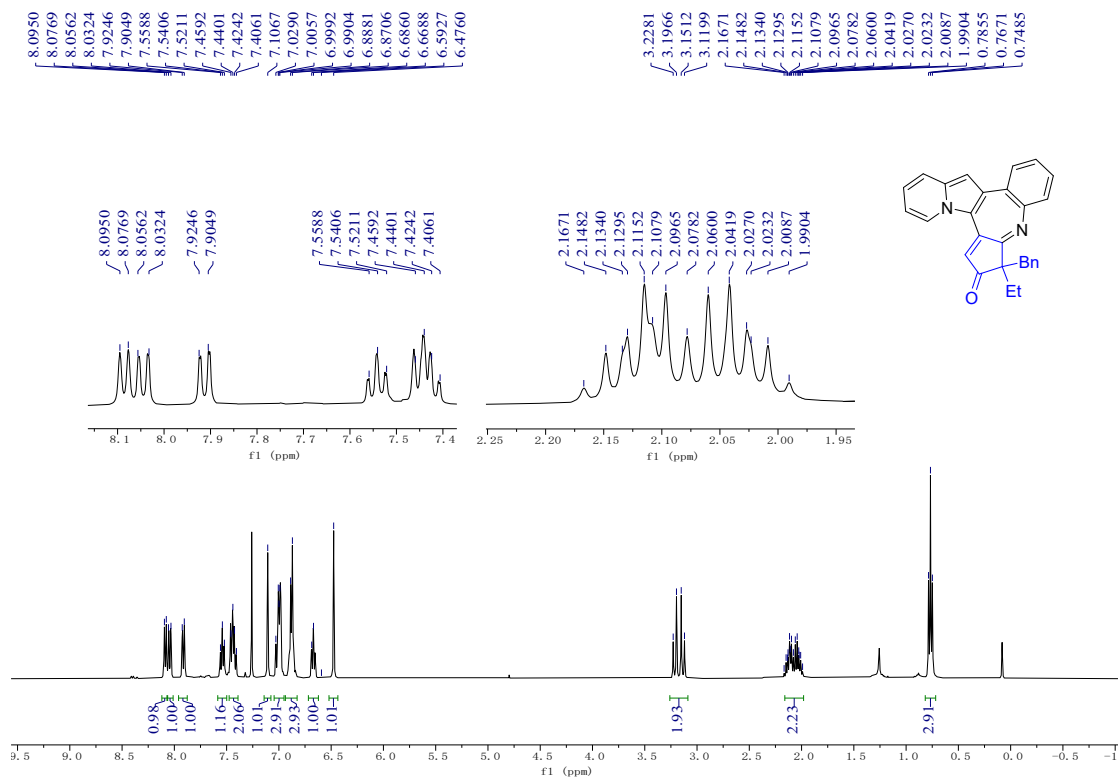

### $^{13}\text{C}$ NMR of **3pa** (101 MHz, $\text{CDCl}_3$ )

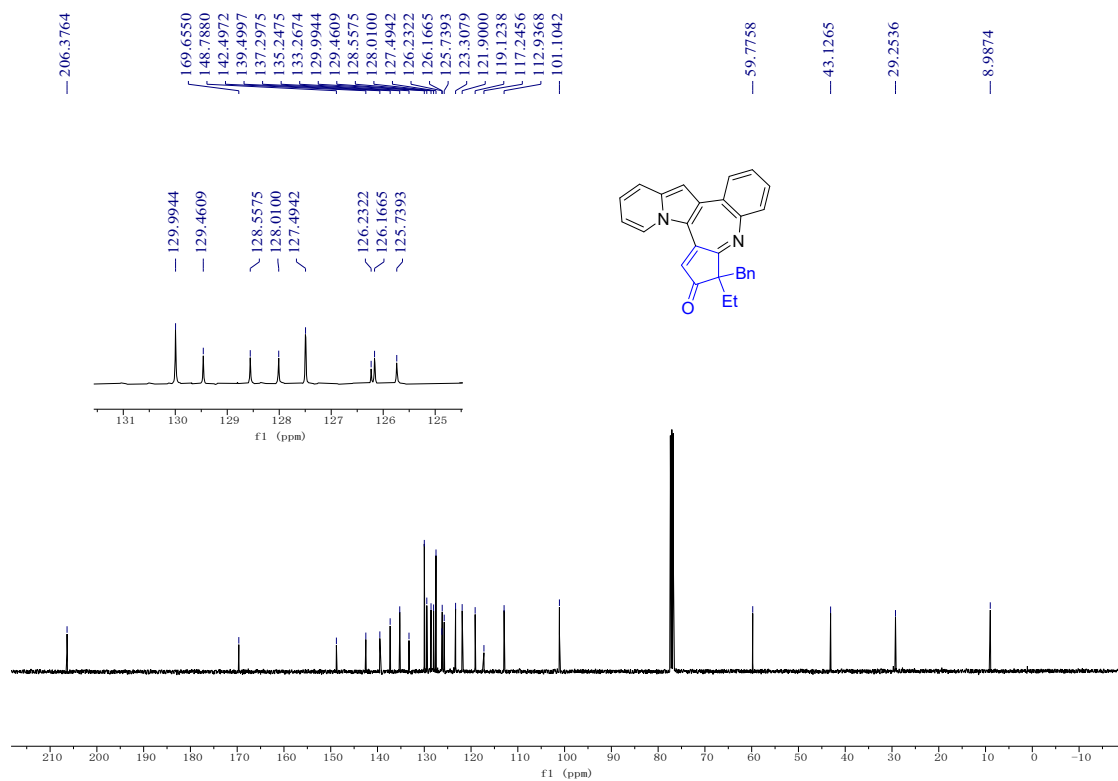

<sup>1</sup>H NMR of **3qa** (400 MHz, CDCl<sub>3</sub>)

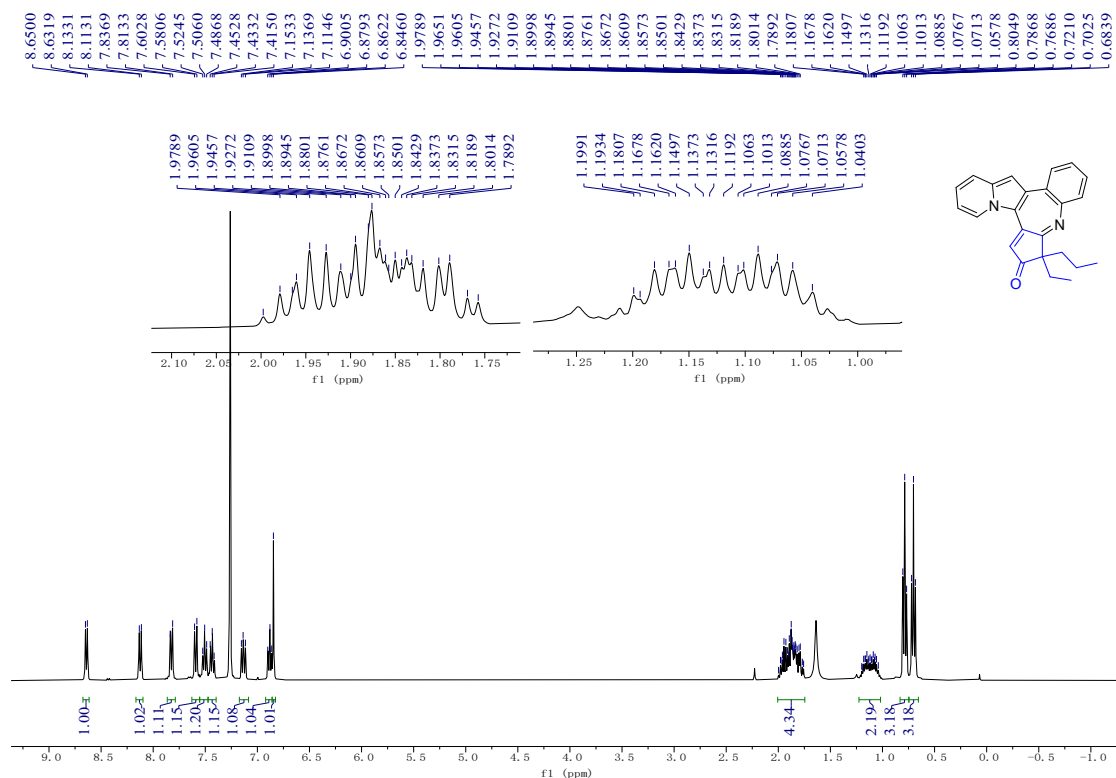

<sup>13</sup>C NMR of **3qa** (101 MHz, CDCl<sub>3</sub>)

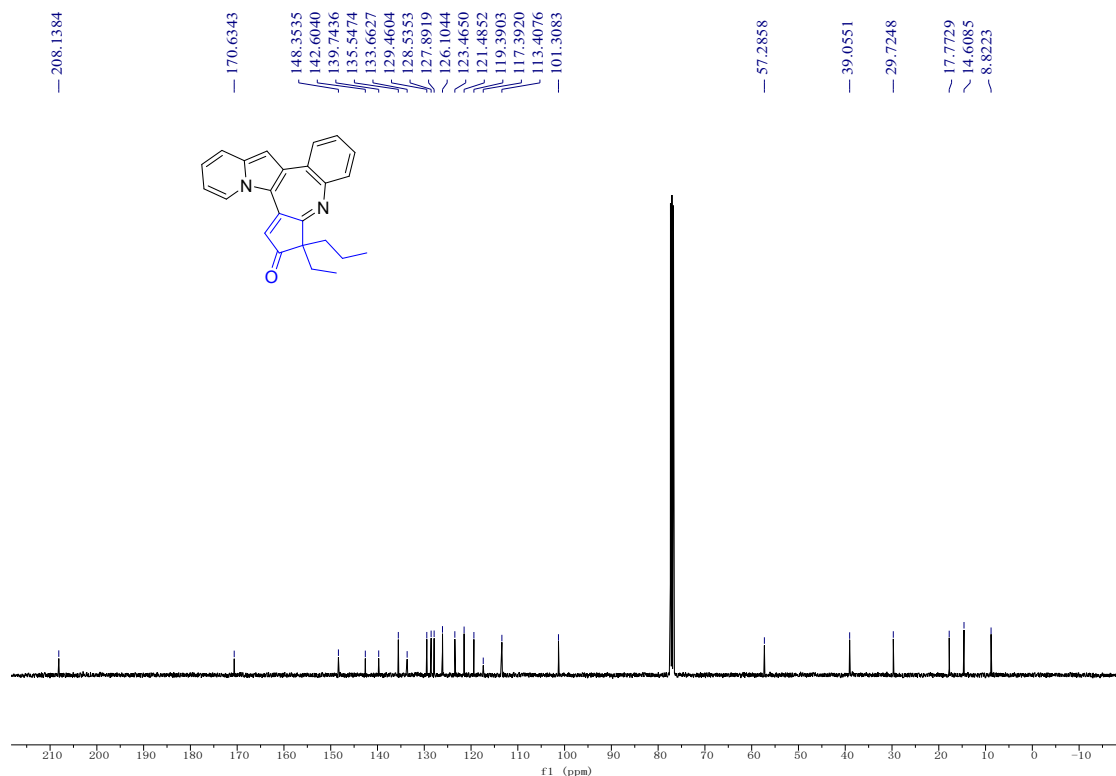

### $^1\text{H}$ NMR of **3ab** (400 MHz, $\text{CDCl}_3$ )

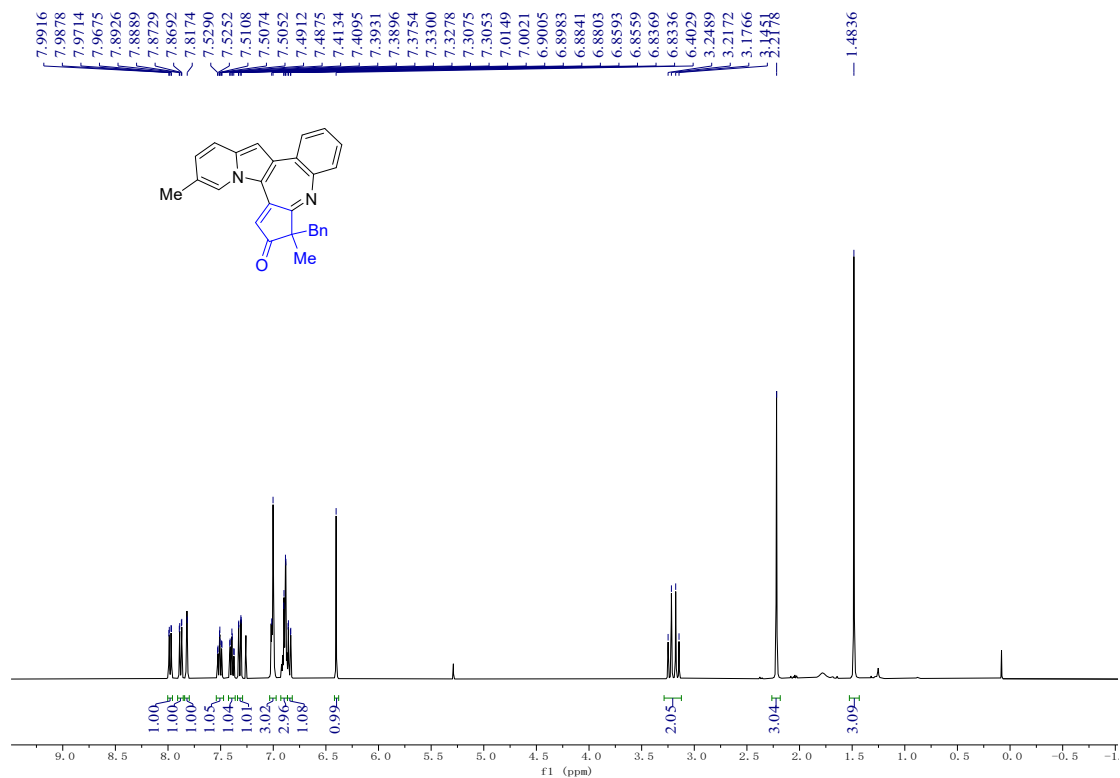

### $^{13}\text{C}$ NMR of **3ab** (101 MHz, $\text{CDCl}_3$ )

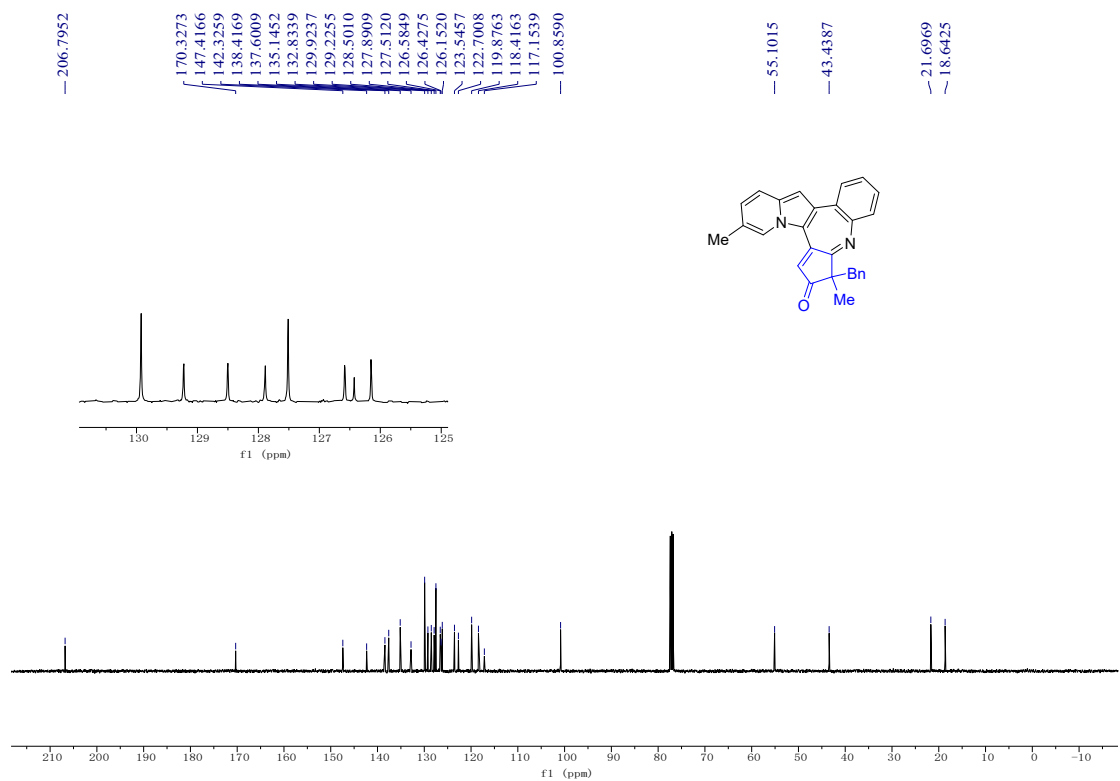

**<sup>1</sup>H NMR of 3ac (400 MHz, CDCl<sub>3</sub>)**

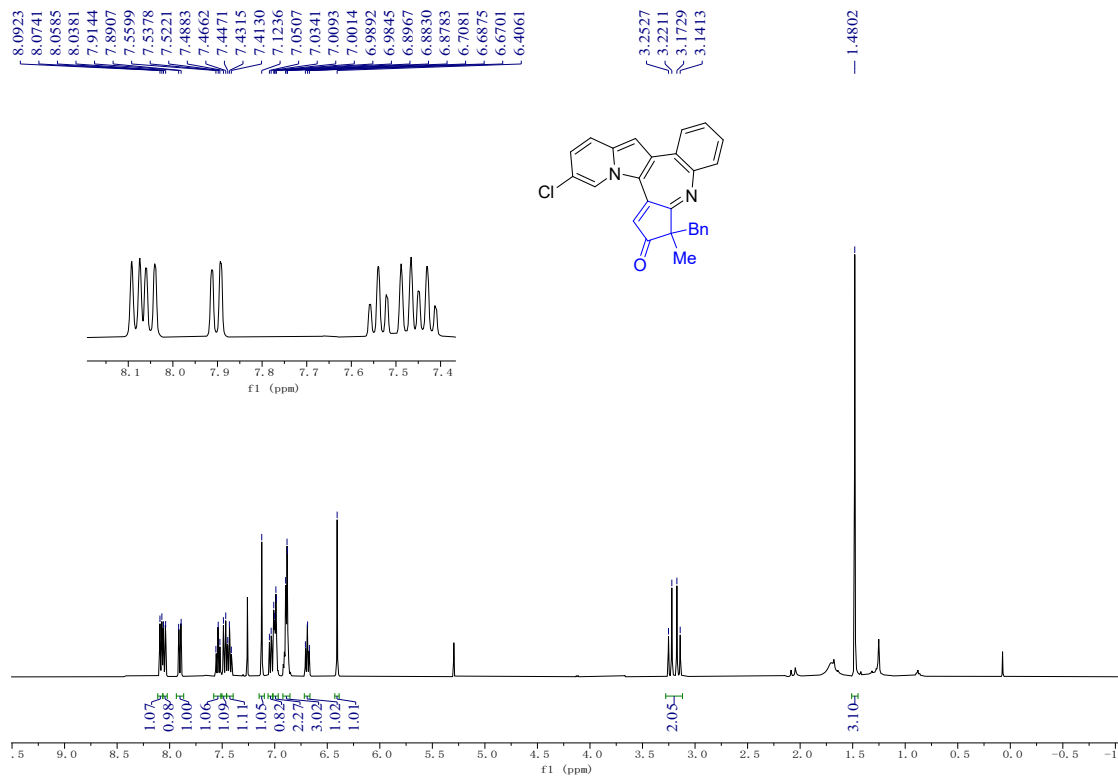

**<sup>13</sup>C NMR of 3ac (101 MHz, CDCl<sub>3</sub>)**

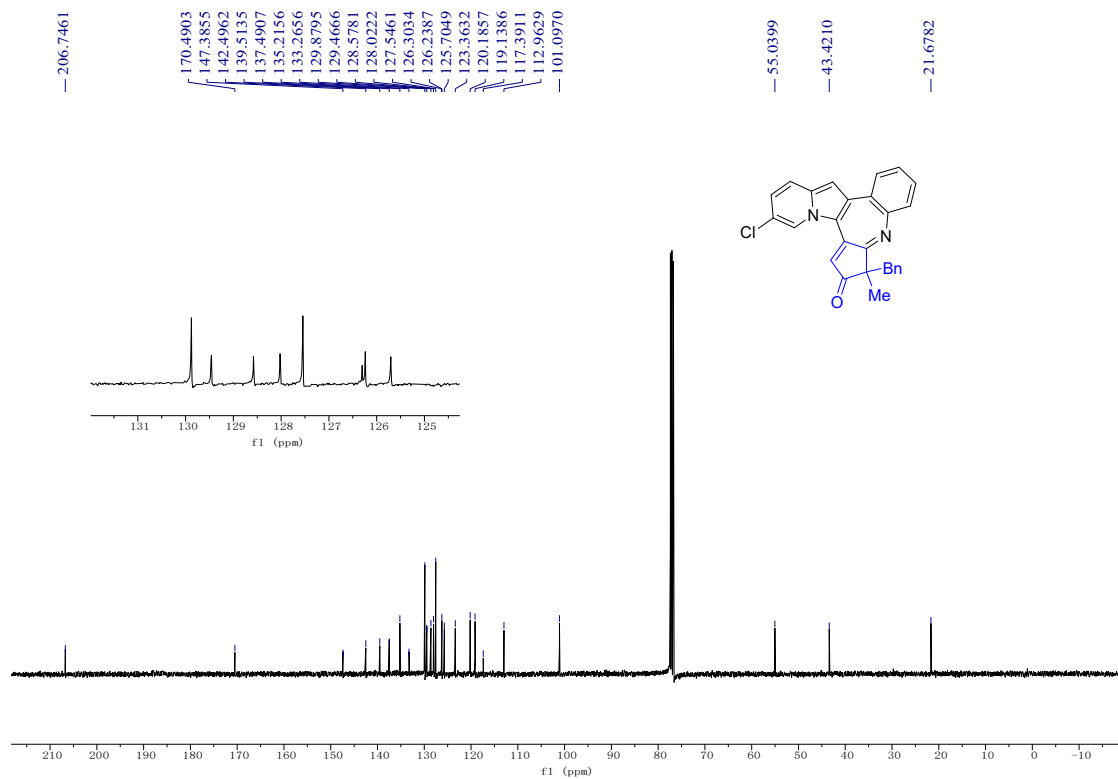

### $^1\text{H}$ NMR of **3ad** (400 MHz, $\text{CDCl}_3$ )

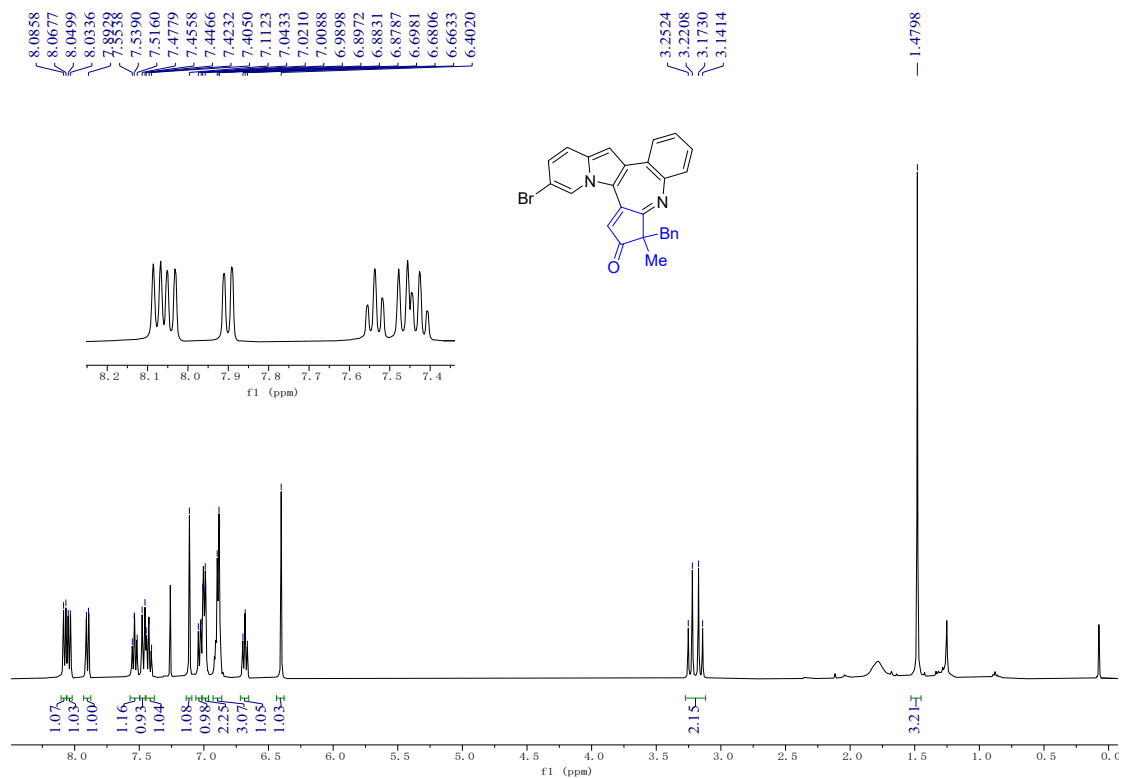

### $^{13}\text{C}$ NMR of **3ad** (101 MHz, $\text{CDCl}_3$ )

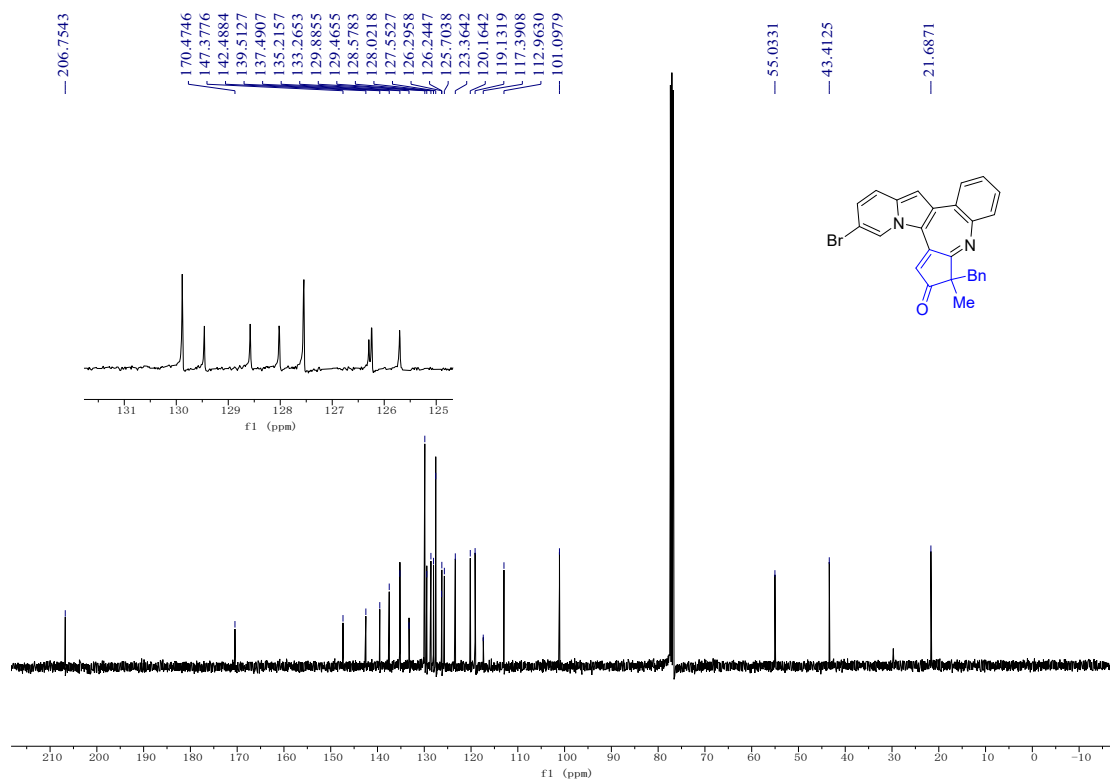

<sup>1</sup>H NMR of **3ae** (400 MHz, CDCl<sub>3</sub>)

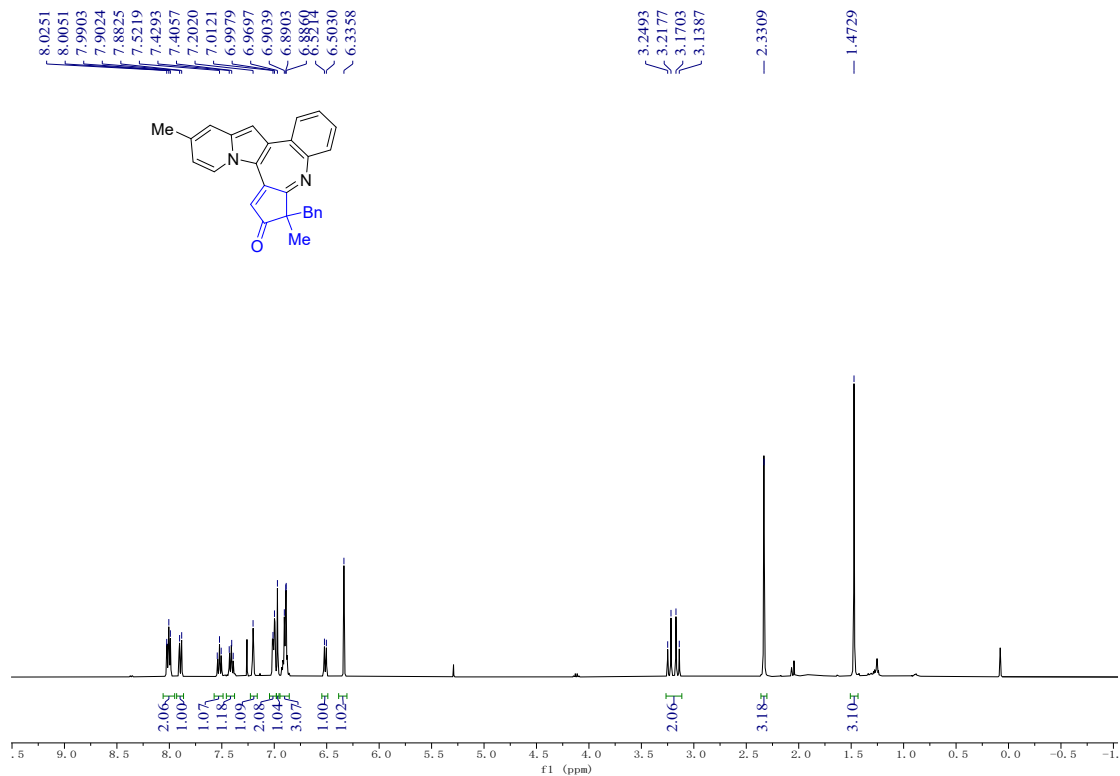

<sup>13</sup>C NMR of **3ae** (101 MHz, CDCl<sub>3</sub>)

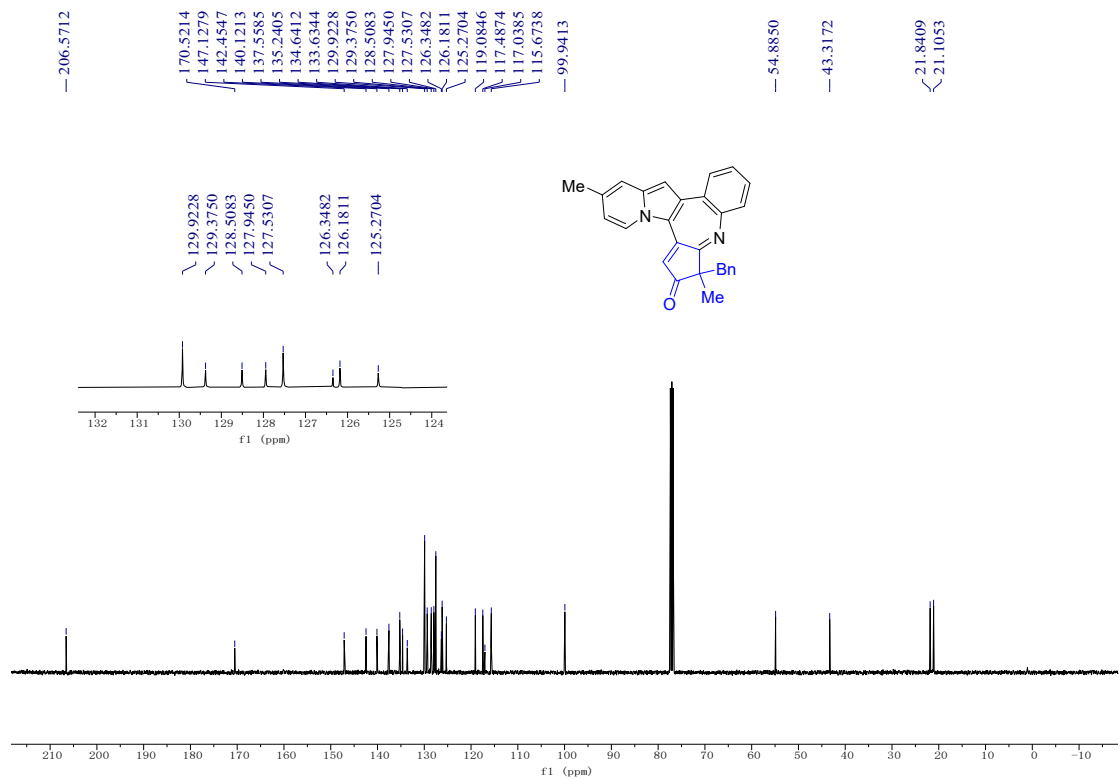



<sup>1</sup>H NMR of **3af** (400 MHz, CDCl<sub>3</sub>)

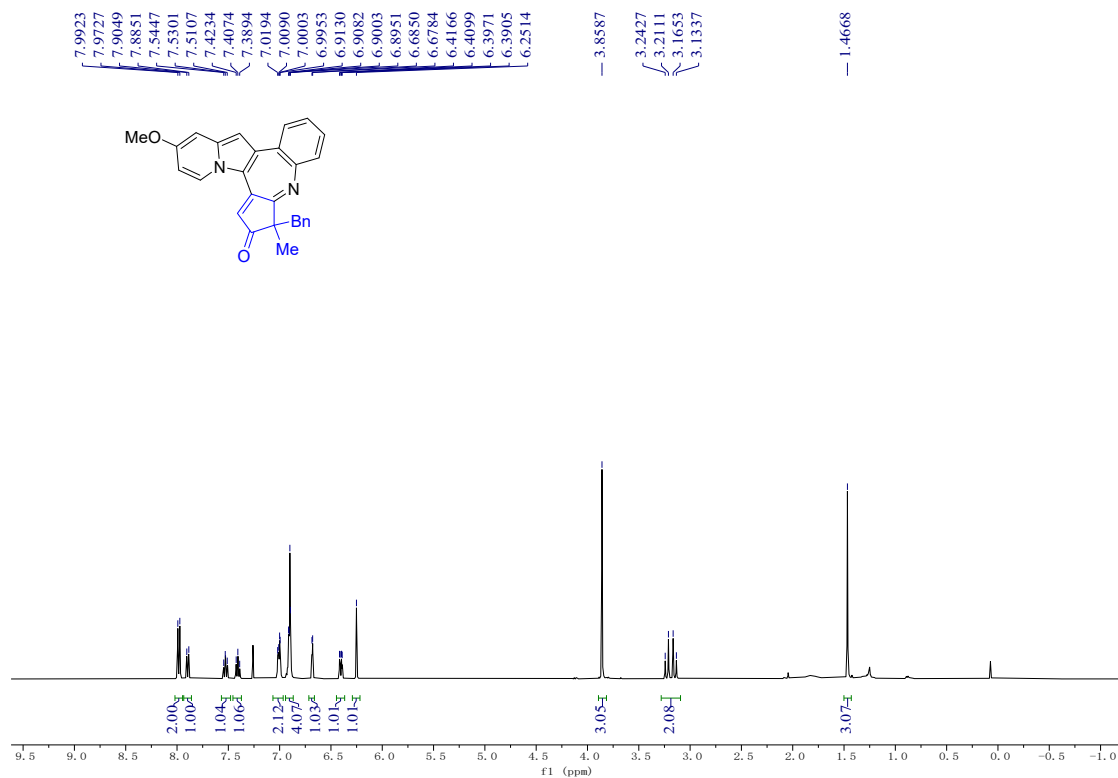

<sup>13</sup>C NMR of **3af** (101 MHz, CDCl<sub>3</sub>)

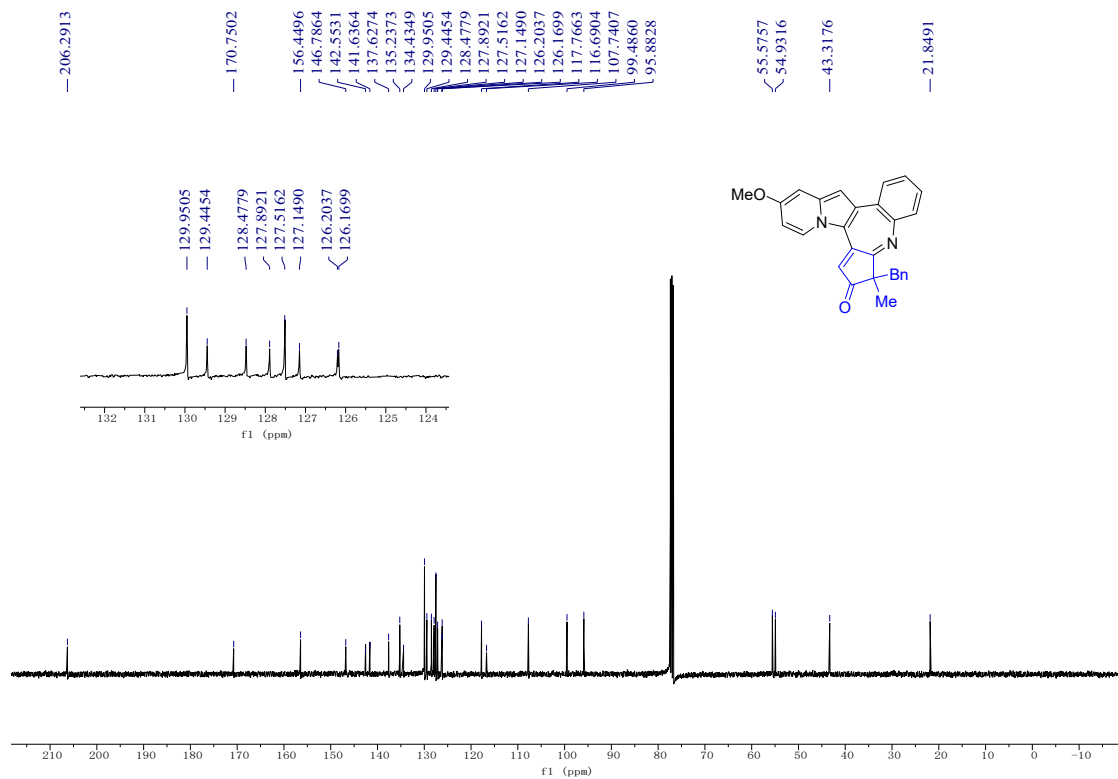

### $^1\text{H}$ NMR of **3ag** (400 MHz, $\text{CDCl}_3$ )

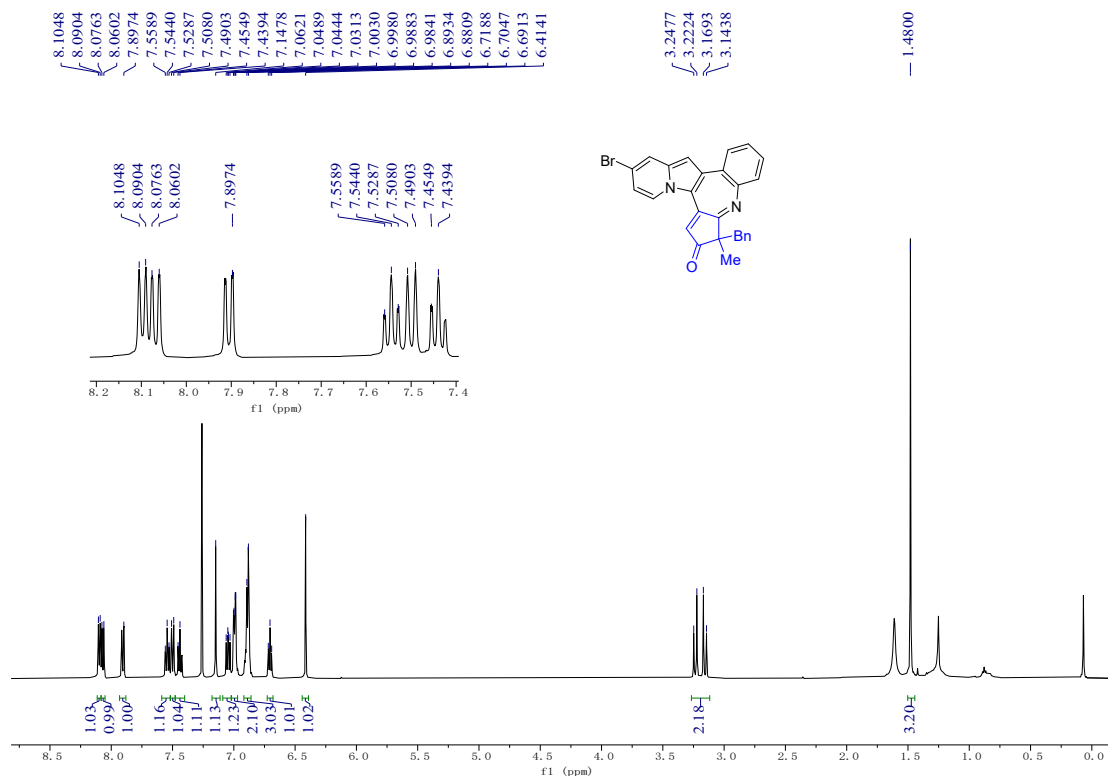

### $^{13}\text{C}$ NMR of **3ag** (101 MHz, $\text{CDCl}_3$ )

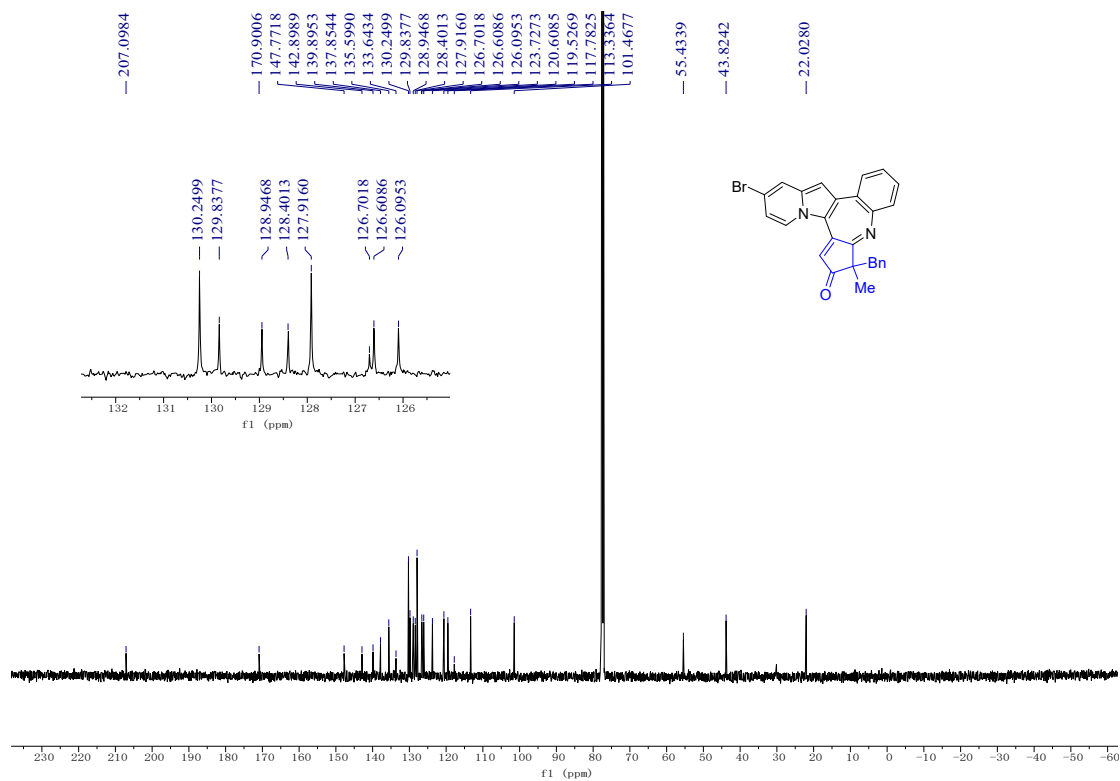

<sup>1</sup>H NMR of **3ah** (400 MHz, CDCl<sub>3</sub>)

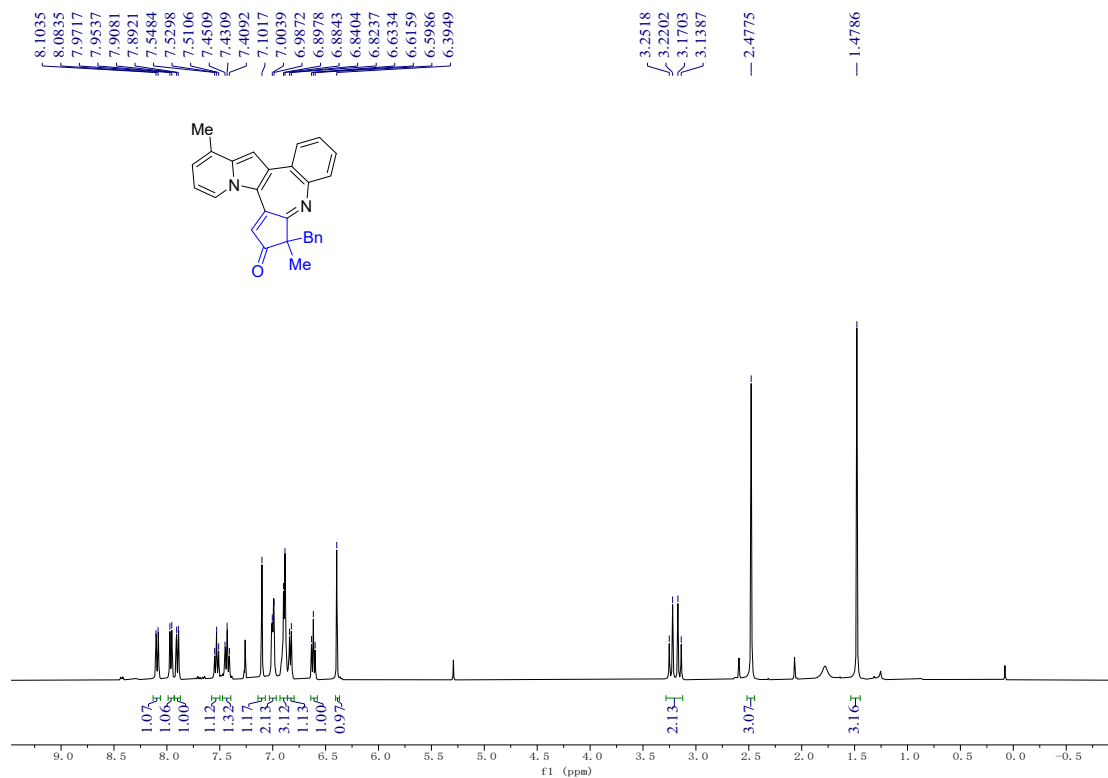

<sup>13</sup>C NMR of **3ah** (101 MHz, CDCl<sub>3</sub>)

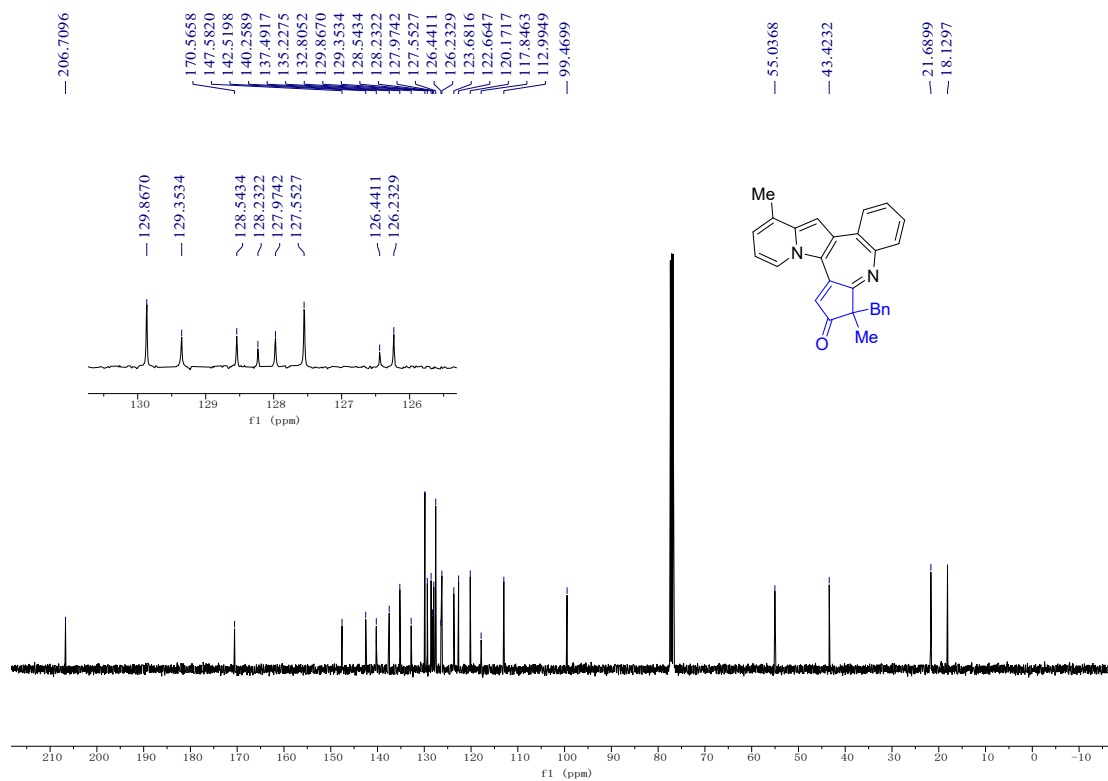

### $^1\text{H}$ NMR of **3aj** (400 MHz, $\text{CDCl}_3$ )

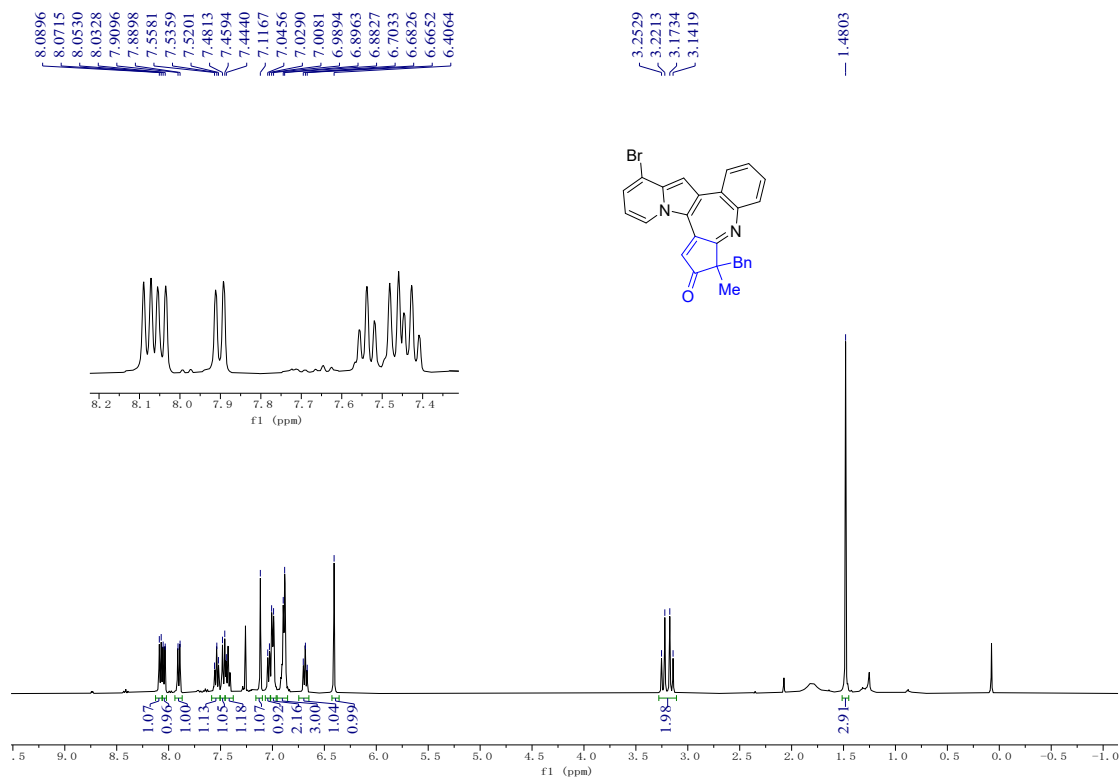

### $^{13}\text{C}$ NMR of **3aj** (101 MHz, $\text{CDCl}_3$ )

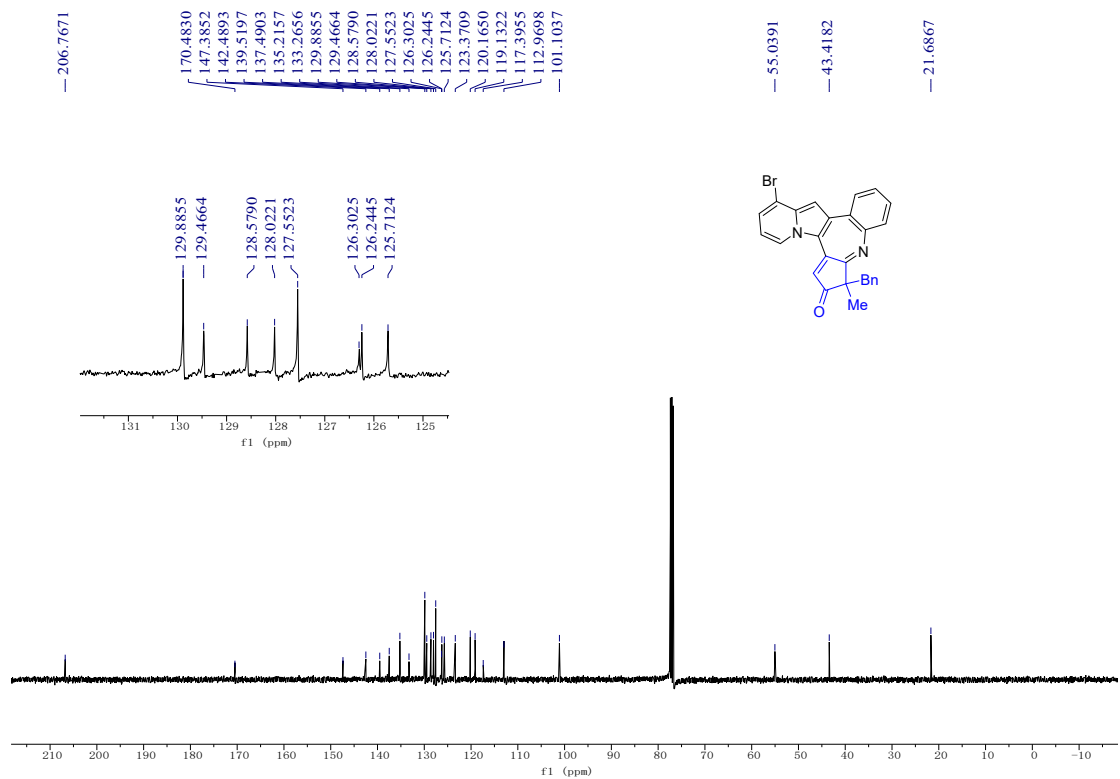

### $^1\text{H}$ NMR of **3ak** (400 MHz, $\text{CDCl}_3$ )

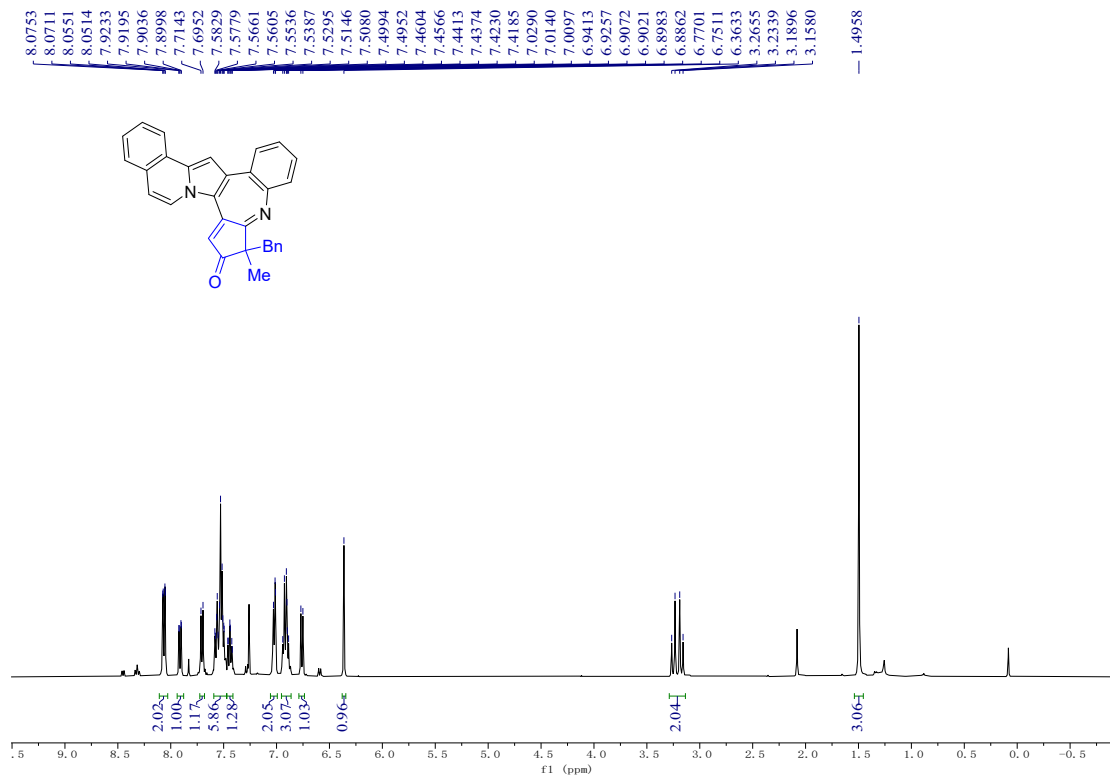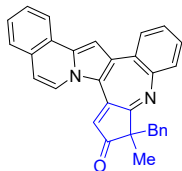

### $^{13}\text{C}$ NMR of **3ak** (101 MHz, $\text{CDCl}_3$ )

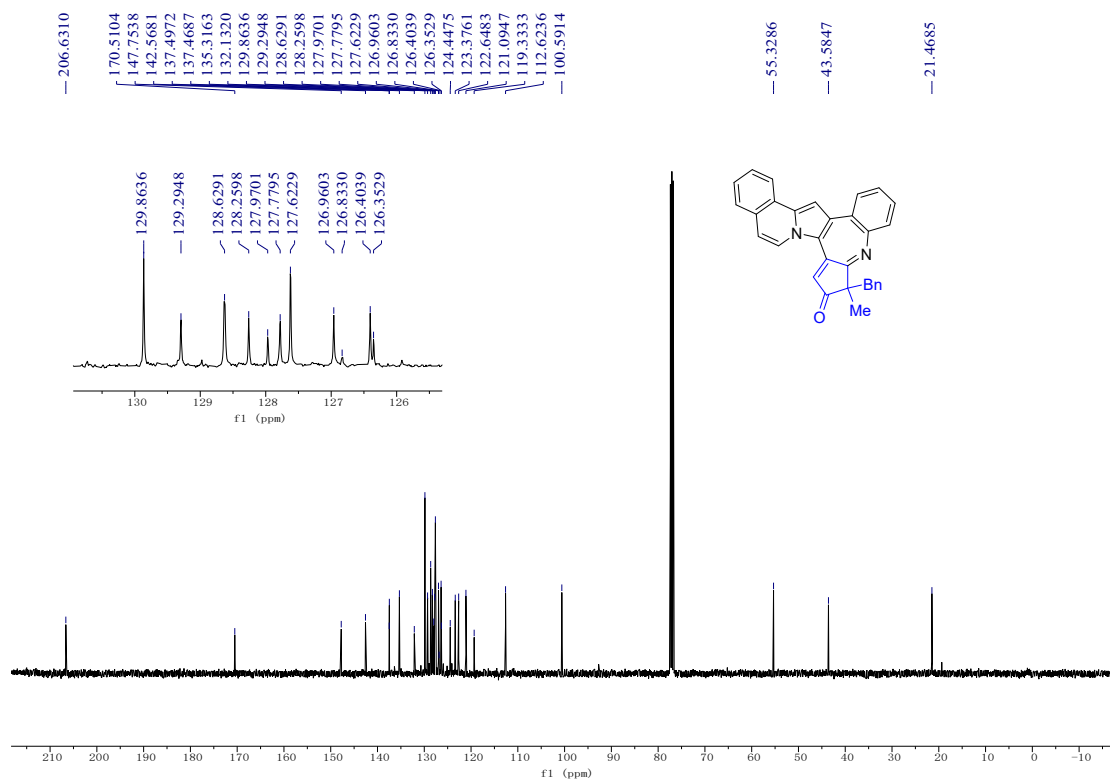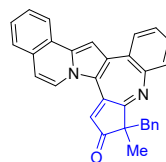

### $^1\text{H}$ NMR of **3aI** (400 MHz, $\text{CDCl}_3$ )

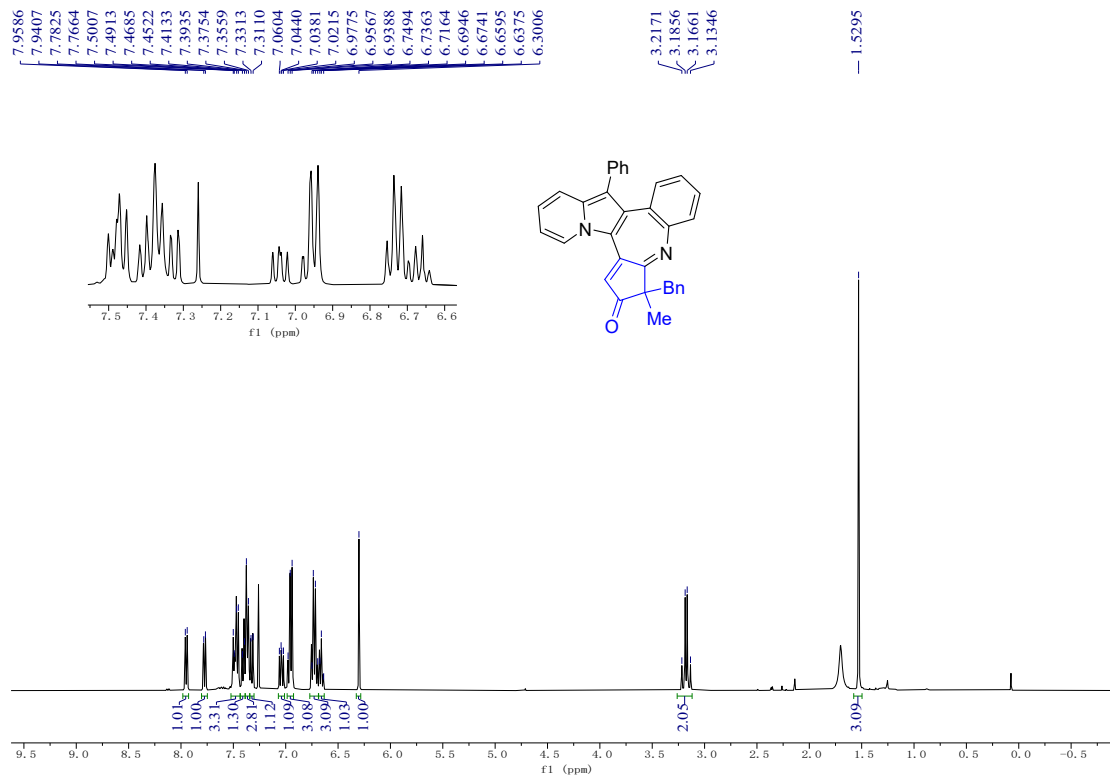

### $^{13}\text{C}$ NMR of **3aI** (101 MHz, $\text{CDCl}_3$ )

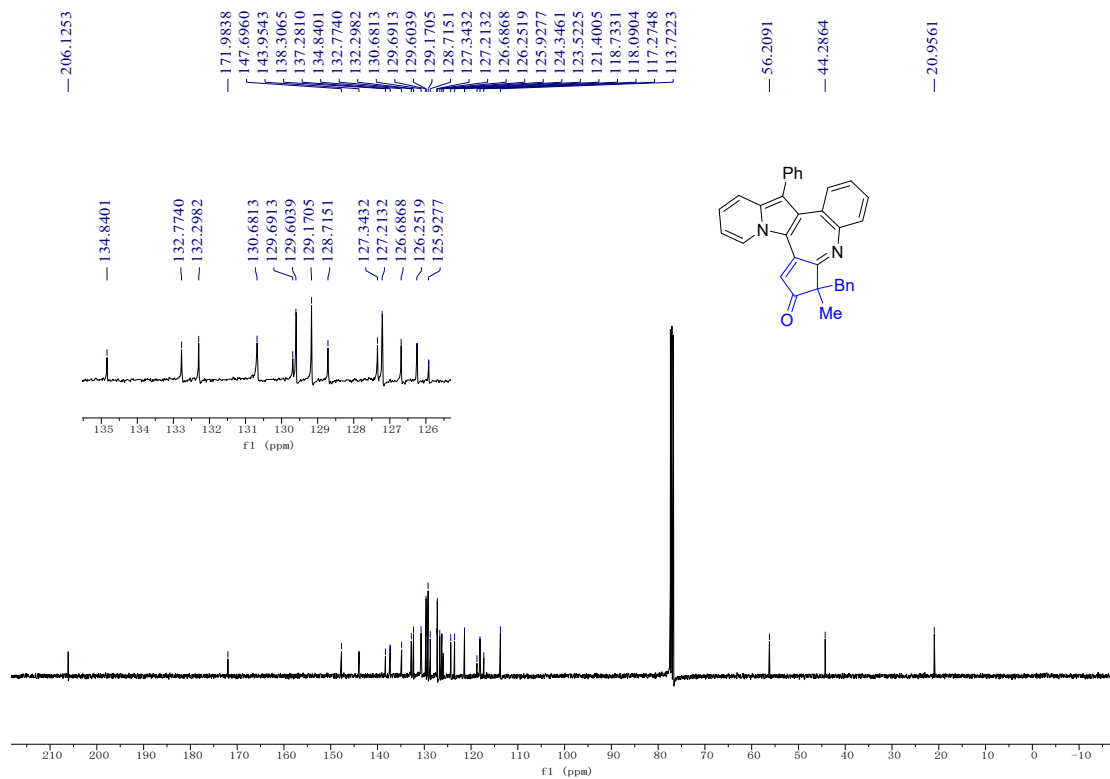

<sup>1</sup>H NMR of **3am** (400 MHz, CDCl<sub>3</sub>)

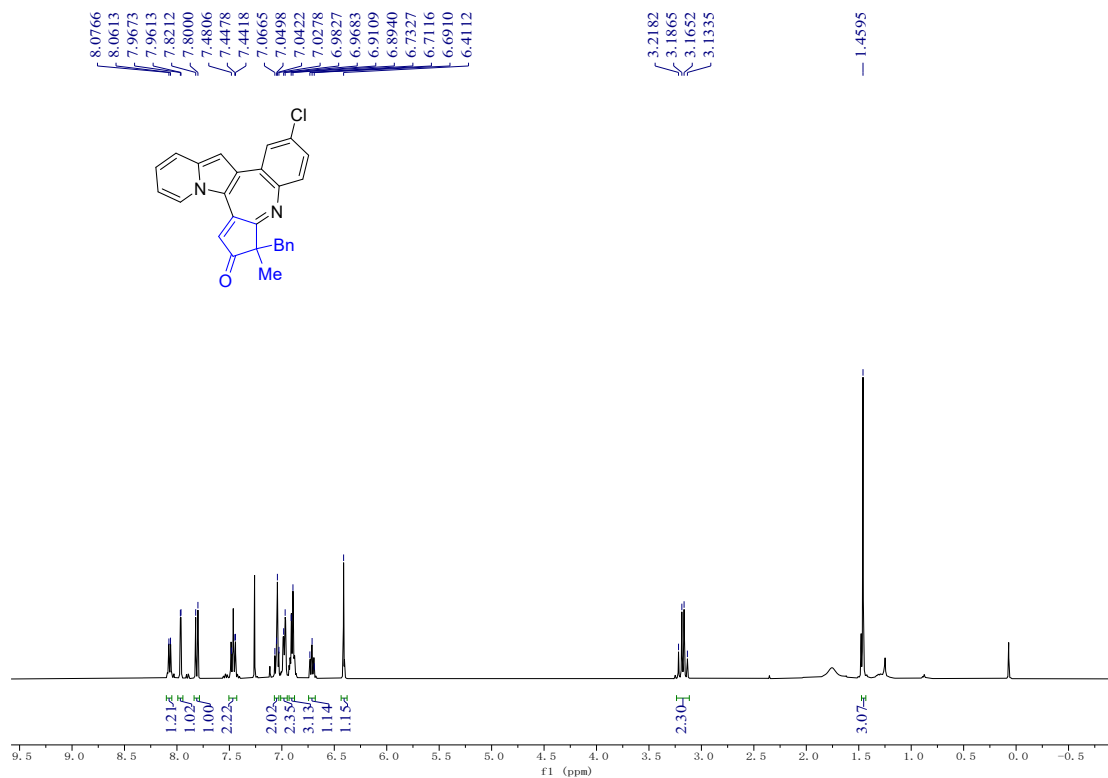

<sup>13</sup>C NMR of **3am** (101 MHz, CDCl<sub>3</sub>)

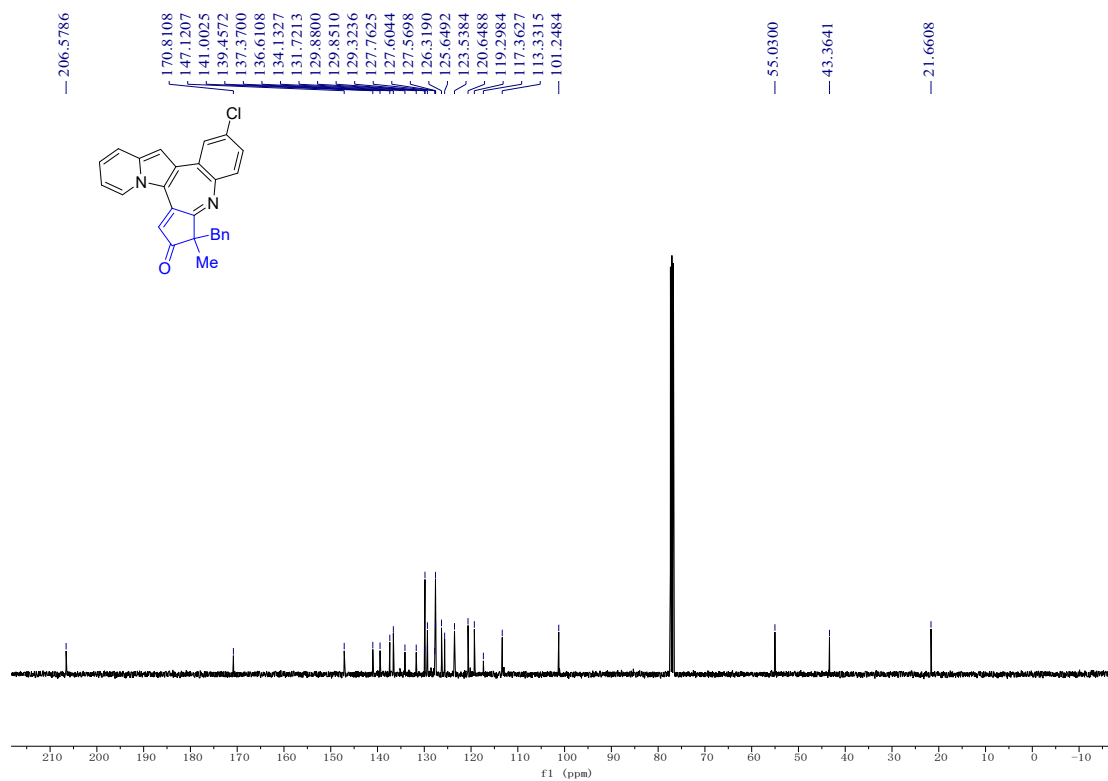

### $^1\text{H}$ NMR of **4** (400 MHz, $\text{CDCl}_3$ )

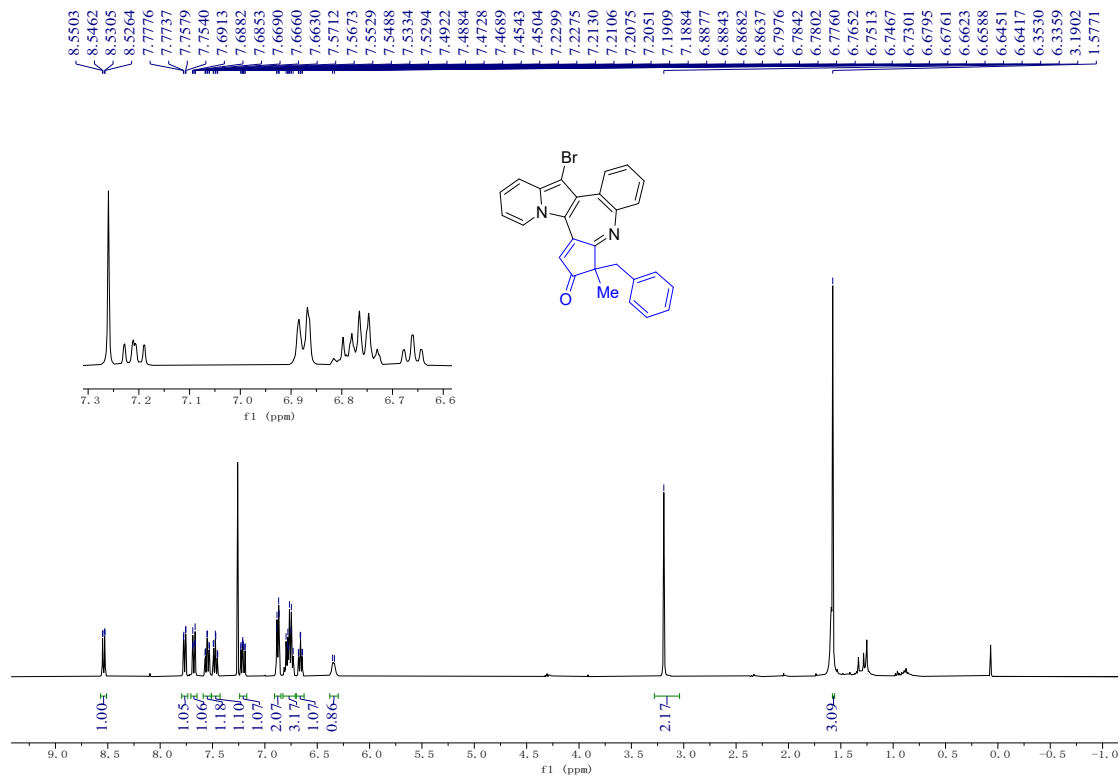

### $^{13}\text{C}$ NMR of **4** (101 MHz, $\text{CDCl}_3$ )

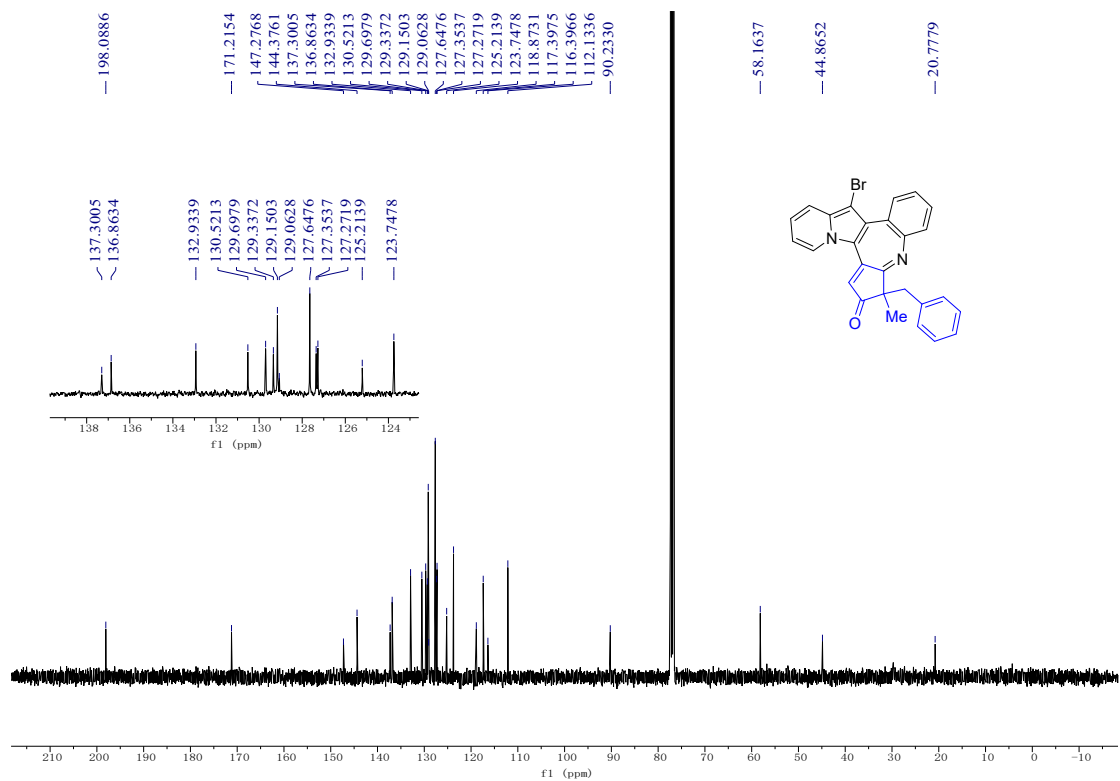



<sup>1</sup>H NMR of 5 (400 MHz, CDCl<sub>3</sub>)

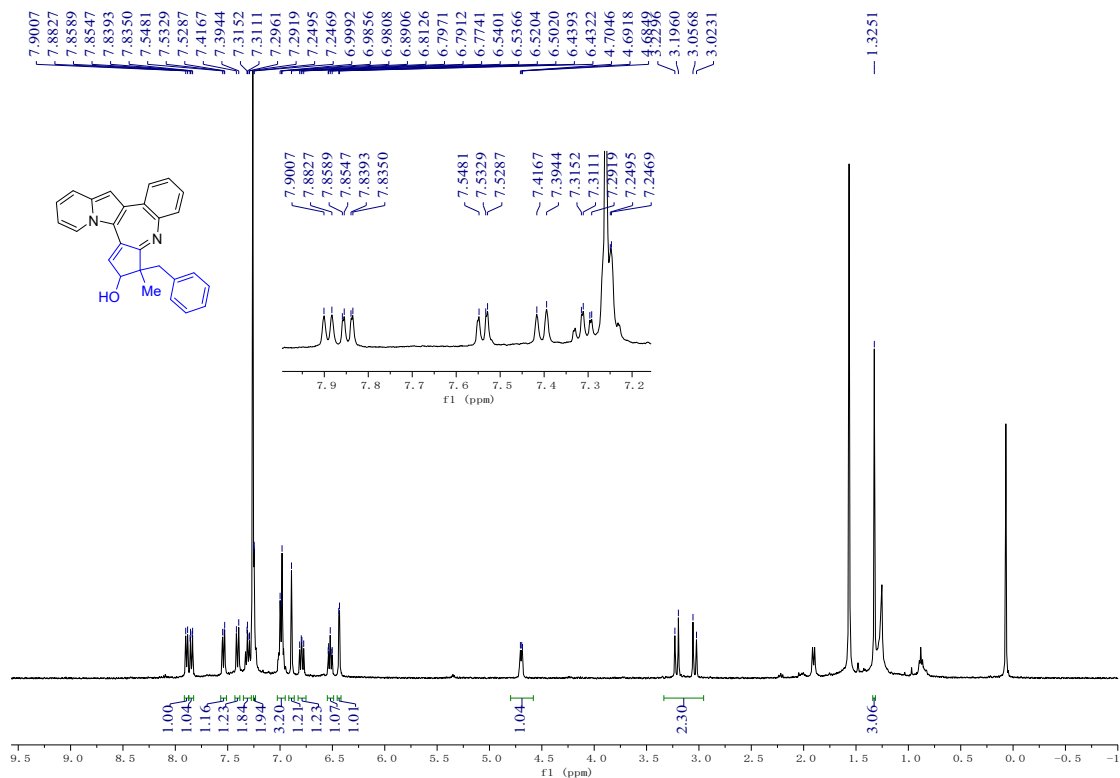

<sup>13</sup>C NMR of 5 (101 MHz, CDCl<sub>3</sub>)

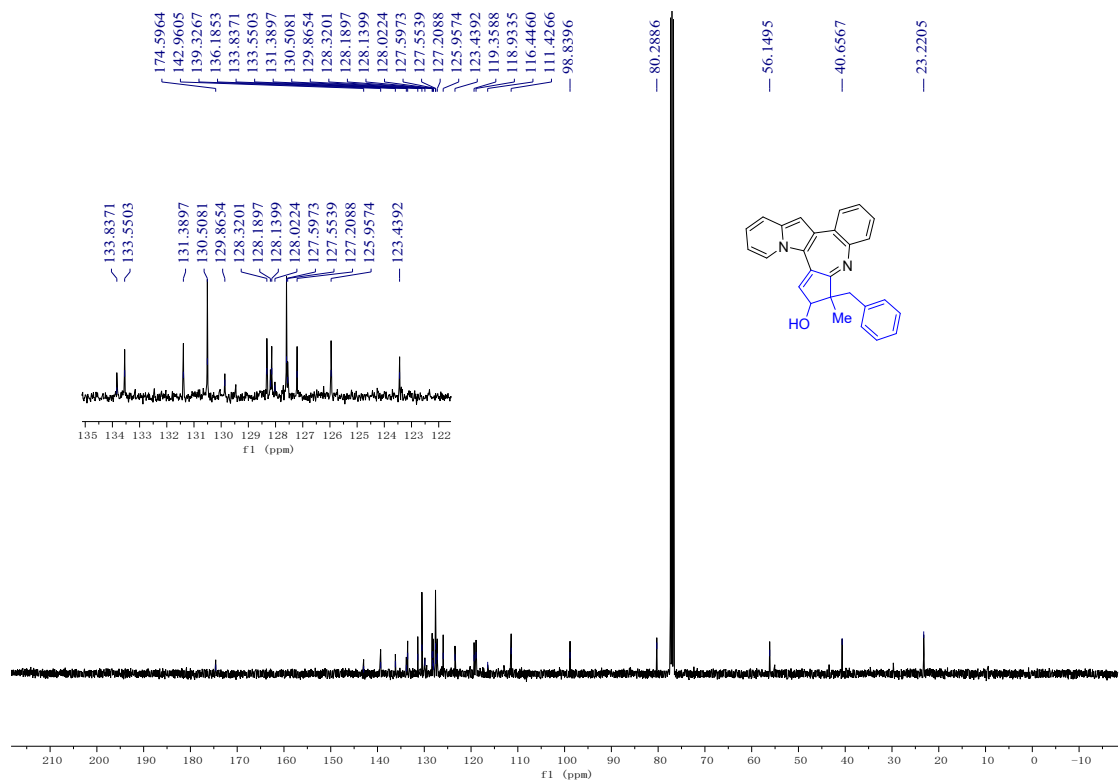

<sup>1</sup>H NMR of **6** (400 MHz, CDCl<sub>3</sub>)

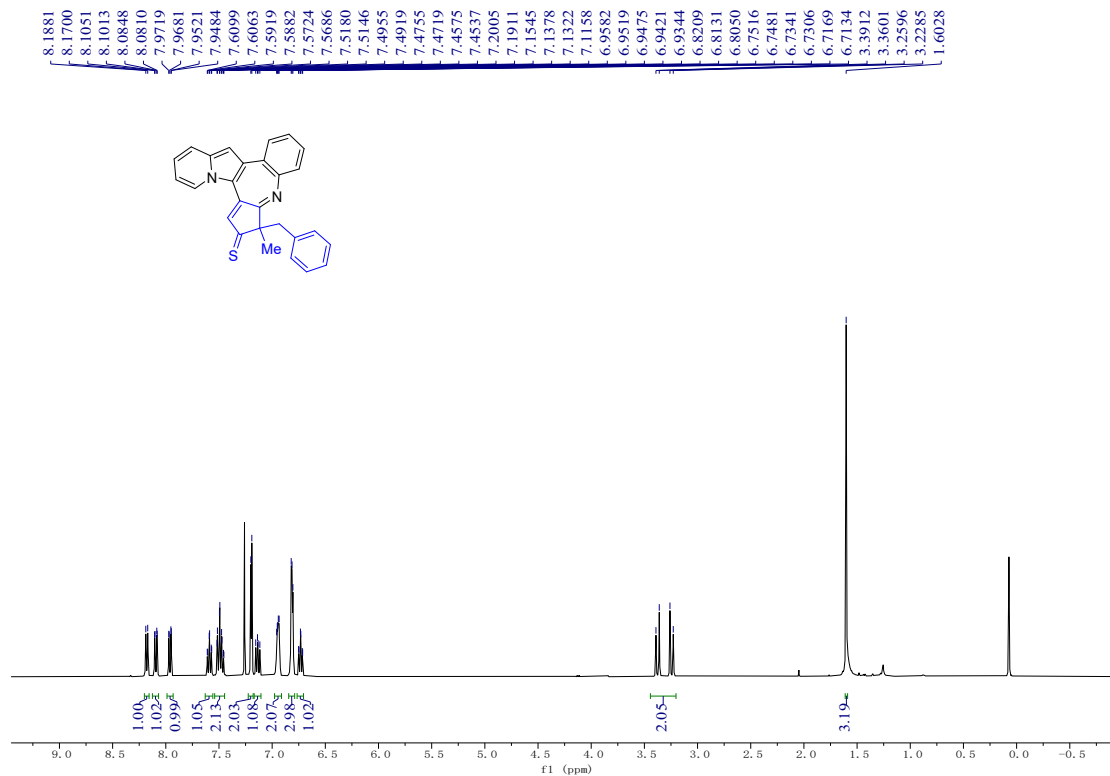

<sup>13</sup>C NMR of **6** (101 MHz, CDCl<sub>3</sub>)

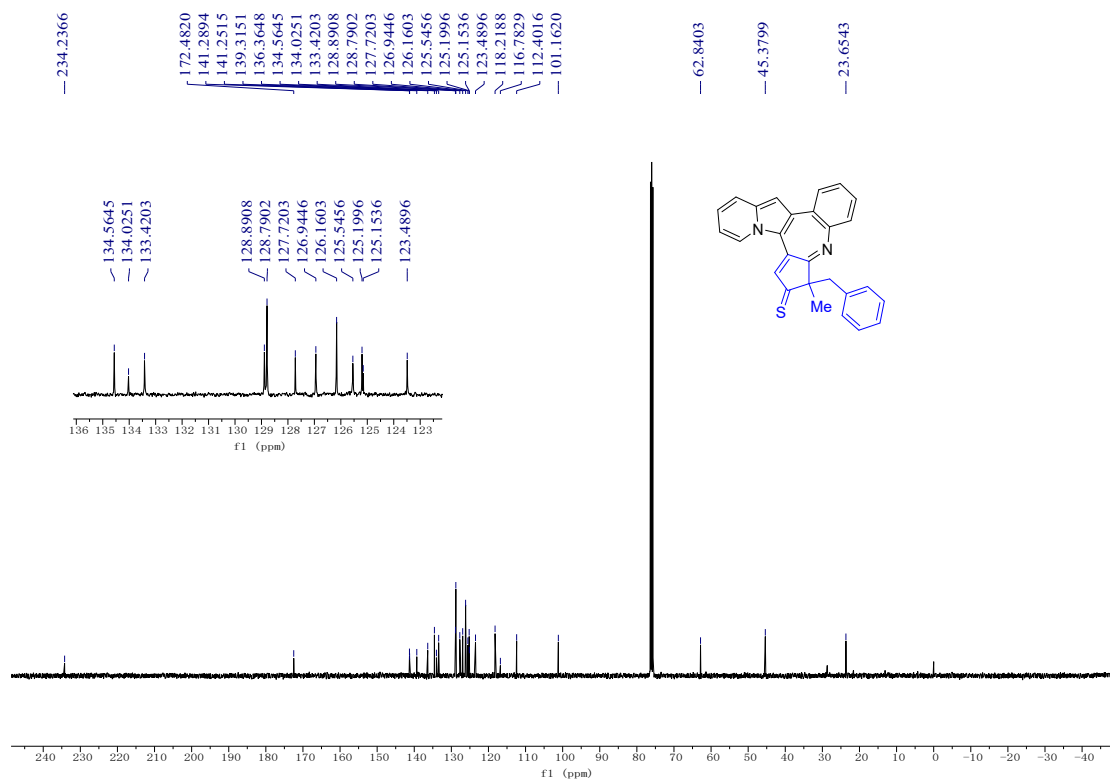

Supplement: d3qo00266g1.pdf [file d3qo00266g1.pdf]
